# Supplementary material
Source: PubMed Central journal article supplement (PMC7722144)

## Table of contents

| <b>Subject</b>                                                      | <b>Page No.</b> |
|---------------------------------------------------------------------|-----------------|
| Figure S1                                                           | S2              |
| Figure S2                                                           | S3              |
| Figure S3                                                           | S3              |
| 1D and 2D NMR spectra of compounds <b>1-4, 9, 12, 13, 14, 16-32</b> | S4-S45          |

**Figure S1:** ESI-TOF LC-MS of Q $\beta$ -glycan conjugate **1** with peaks from Q $\beta$  coat protein monomer and the respective Q $\beta$ -glycan conjugates marked. Assuming Q $\beta$  monomer and Q $\beta$ -glycan conjugates have the same ionizing efficiencies, the ion intensities of the peaks were used to estimate the relative quantities of each species. On average, there were 1.61 glycan **1** per Q $\beta$  monomer, which corresponds to 290 copies of glycan **1** per Q $\beta$  particle.

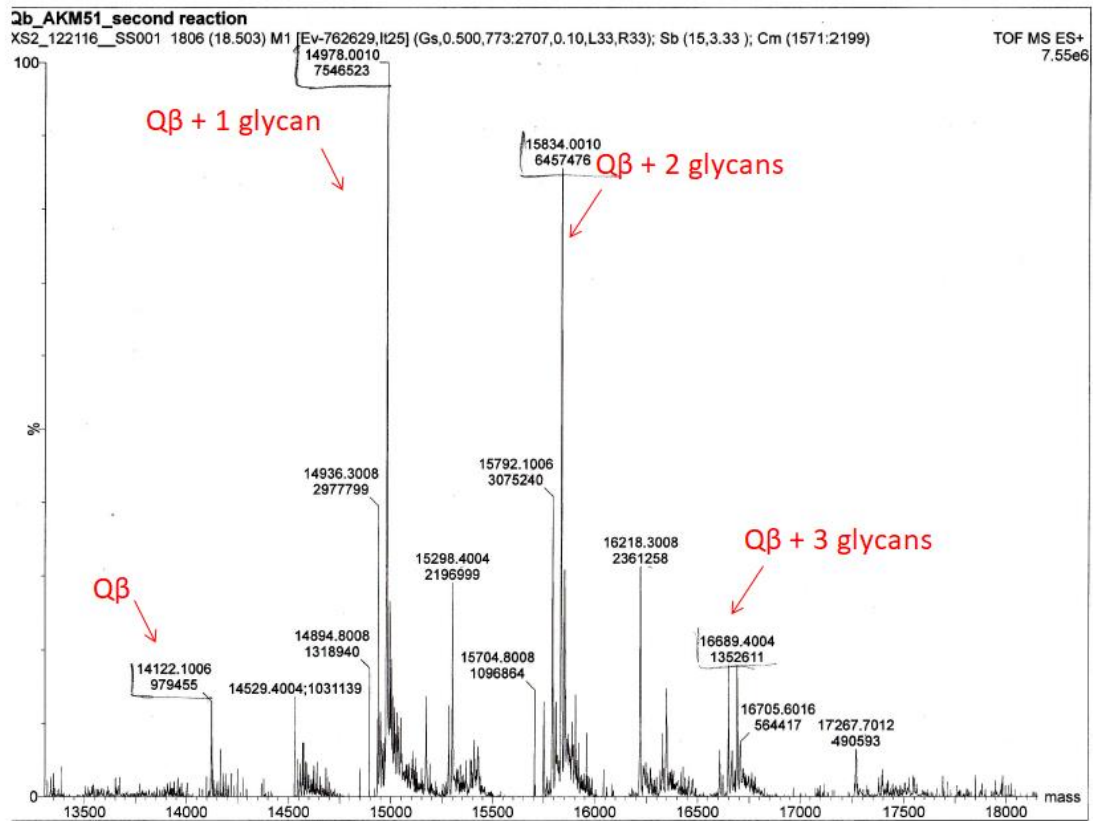

**Figure S2:** MALDI-TOF MS of BSA-glycan **1** conjugate. Based on the molecular weight difference between the BSA-glycan **1** conjugate and unmodified BSA, the number of glycan **1** per BSA was calculated to be 15.

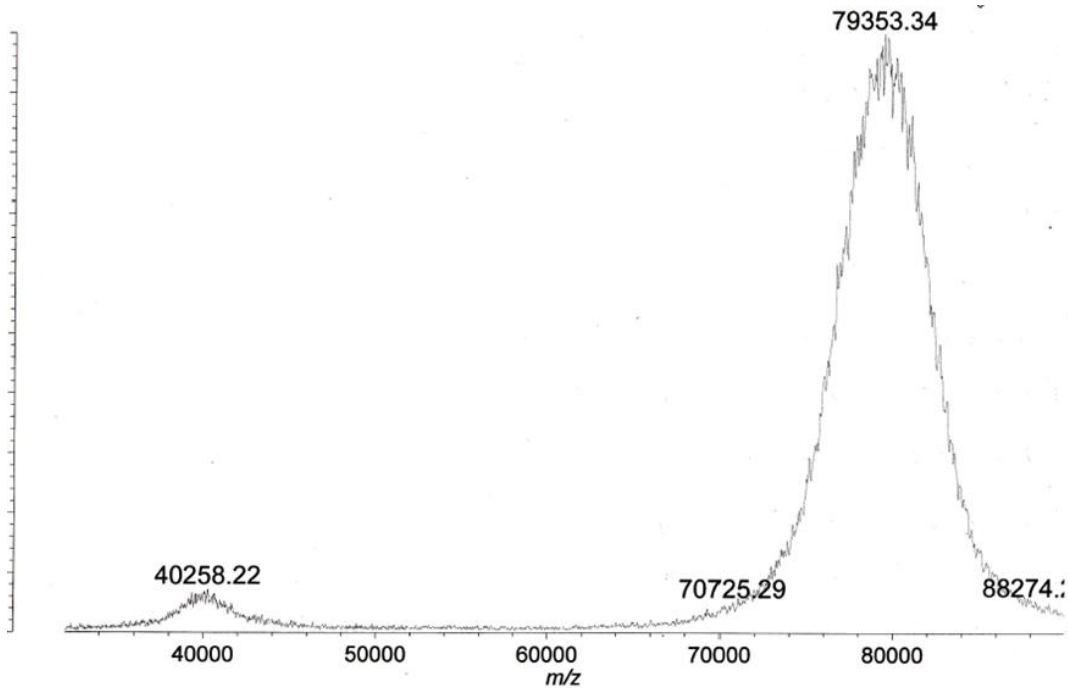

**Figure S3.** The titers of anti-glycan antibody subtypes elicited by Q $\beta$ -glycan **1** from mice (day 35, 4  $\mu$ g). ELISA titers were calculated as the highest fold of serum dilution that gave optical density of 0.1 higher than the background in ELISA assays. Each symbol represents one mouse, with the long horizontal line for each group representing the mean value of each group.

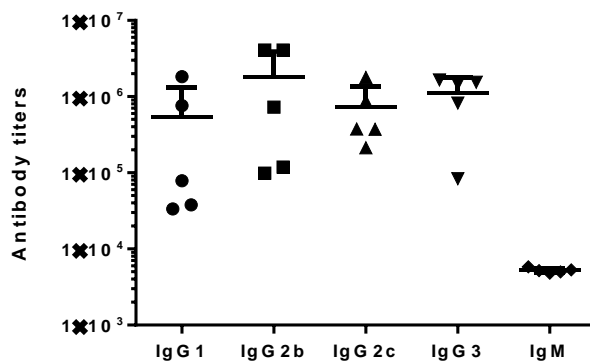

**Table S1.** a) Anti-glycan 1IgG ELISA titers from rabbits immunized with Q $\beta$ -glycan 1 conjugate. b) Anti-*S. Paratyphi A* OPS IgG ELISA titers from rabbits immunized with Q $\beta$ -glycan 1 conjugate.

| a)       | anti-glycan 1 IgG (ELISA unit) |                          |                          |                          |
|----------|--------------------------------|--------------------------|--------------------------|--------------------------|
|          | Pre-immunization               | Day 35 post immunization | Day 49 post immunization | Day 56 post immunization |
| Rabbit 1 | <2,000                         | 1.2 x 10 <sup>7</sup>    | 1.4 x 10 <sup>7</sup>    | 1.4 x 10 <sup>7</sup>    |
| Rabbit 2 | <2,000                         | 1.6 x 10 <sup>7</sup>    | 2.1 x 10 <sup>7</sup>    | 1.2 x 10 <sup>7</sup>    |

  

| b)       | anti-Paratyphi A OPS IgG (ELISA unit) |                          |
|----------|---------------------------------------|--------------------------|
|          | Pre-immunization                      | Day 56 post immunization |
| Rabbit 1 | 181                                   | 1.8 x 10 <sup>6</sup>    |
| Rabbit 2 | 84                                    | 2.4 x 10 <sup>6</sup>    |



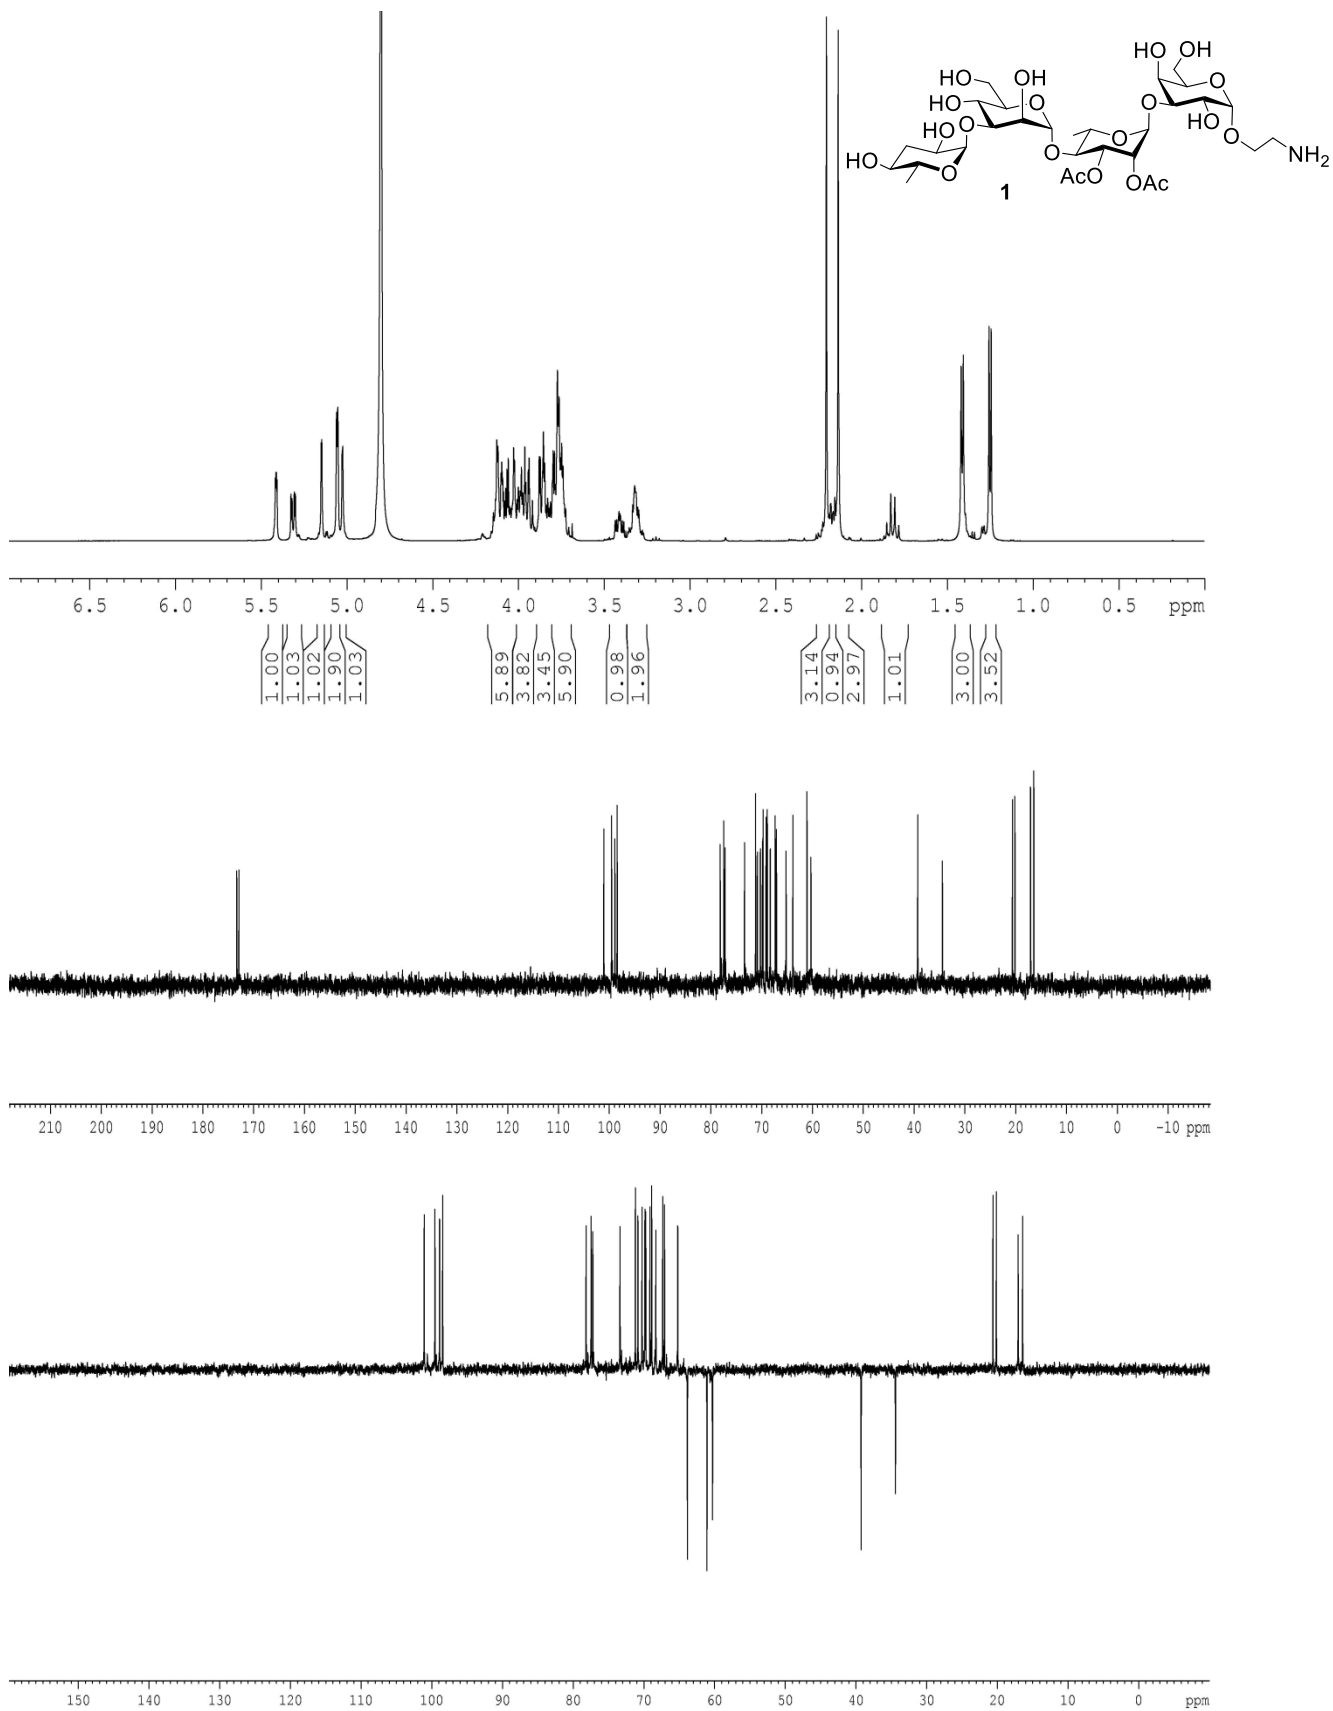

$^1\text{H}$ ,  $^{13}\text{C}$  and DEPT-135 NMR spectra of 2-aminoethyl (3,6-dideoxy- $\alpha$ -D-ribo-hexopyranosyl)-(1 $\rightarrow$ 3)-( $\alpha$ -D-mannopyranosyl)-(1 $\rightarrow$ 4)-(2,3-di-O-acetyl- $\alpha$ -L-rhamnopyranosyl)-(1 $\rightarrow$ 3)- $\alpha$ -D-galactopyranoside (**1**) (D<sub>2</sub>O, 500 MHz).

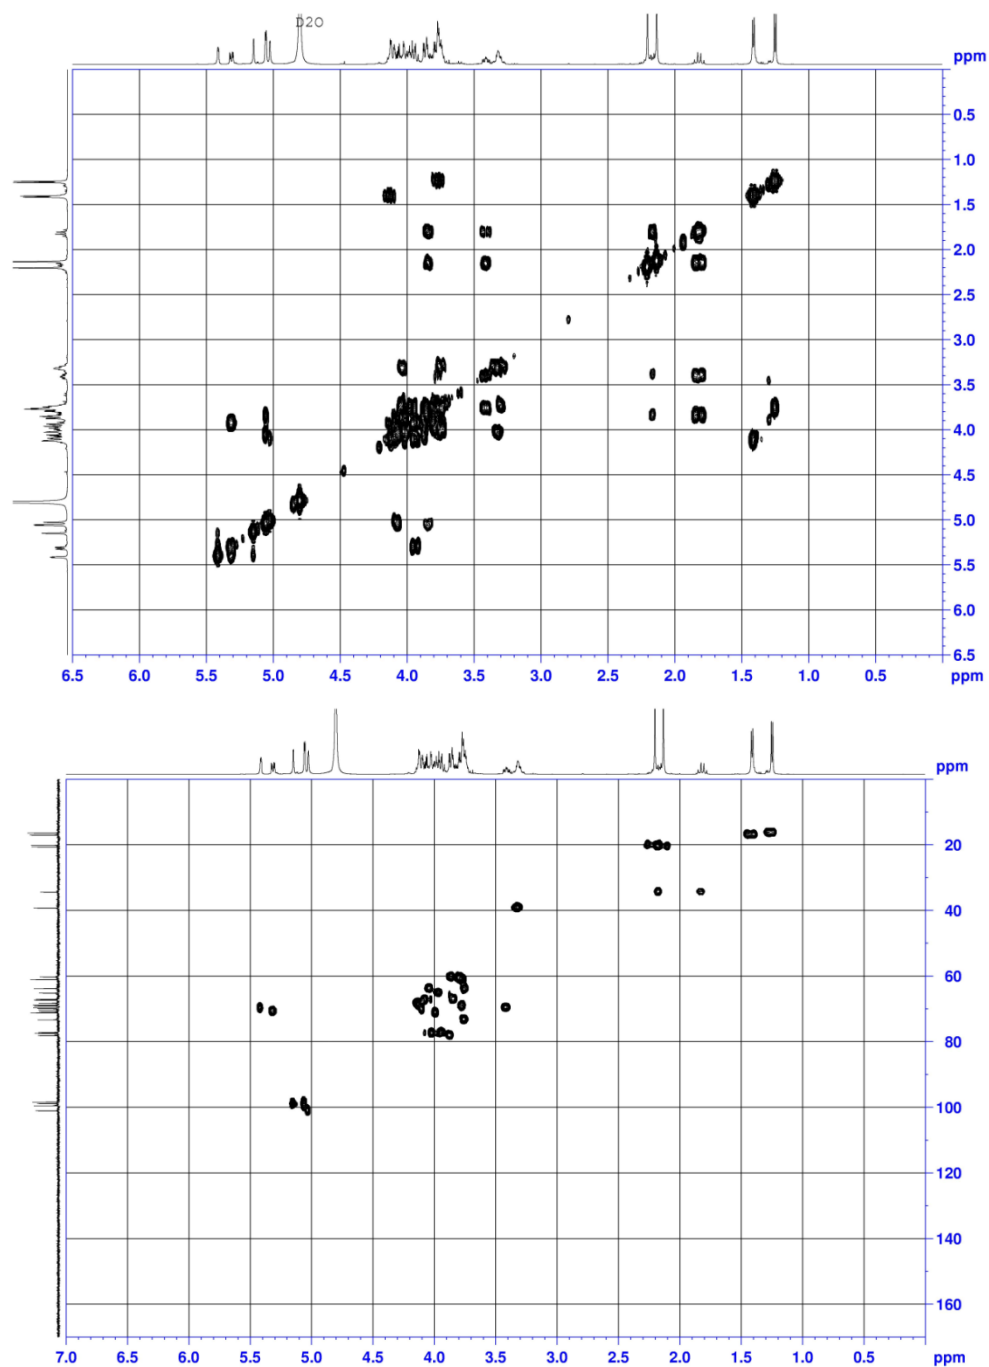

2D COSY and HSQC NMR spectra of 2-aminoethyl (3,6-dideoxy- $\alpha$ -D-ribo-hexopyranosyl)-(1 $\rightarrow$ 3)-(2,3-di-O-acetyl- $\alpha$ -D-mannopyranosyl)-(1 $\rightarrow$ 4)-( $\alpha$ -L-rhamnopyranosyl)-(1 $\rightarrow$ 3)- $\alpha$ -D-galactopyranoside (**1**) (D<sub>2</sub>O, 500 MHz).

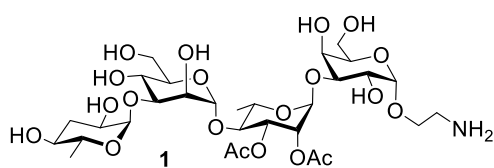

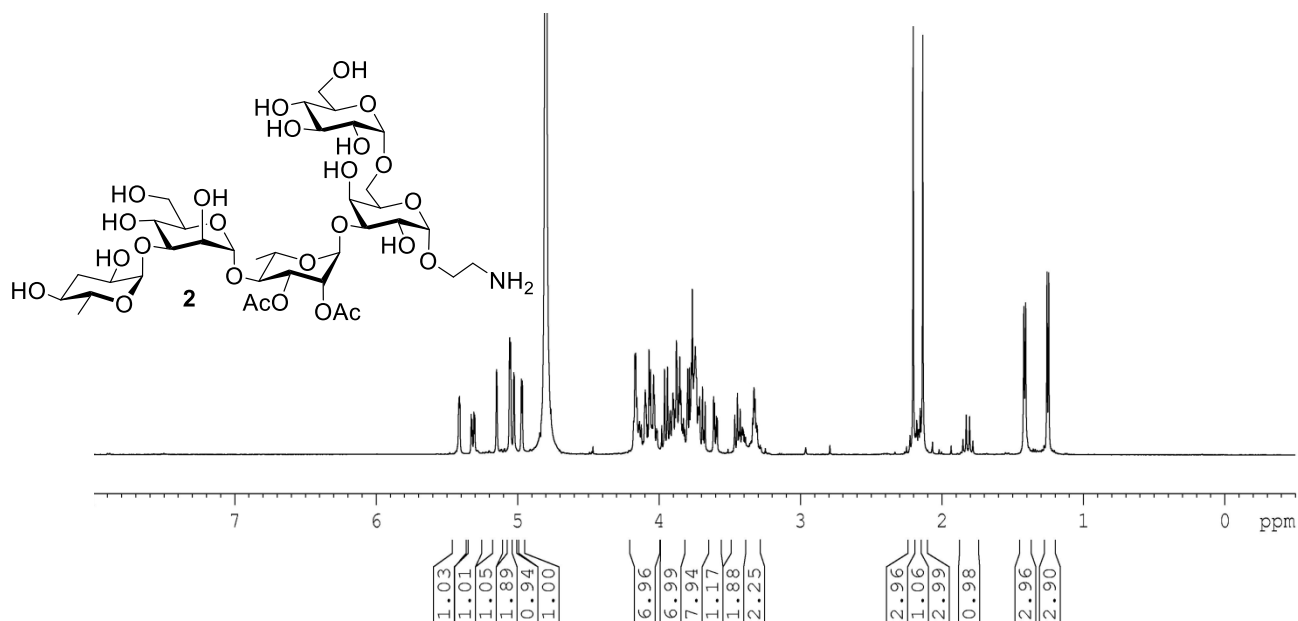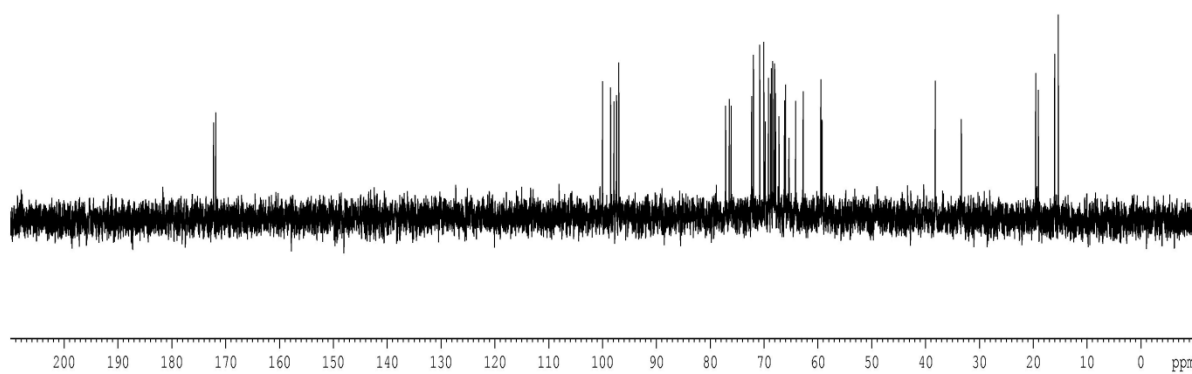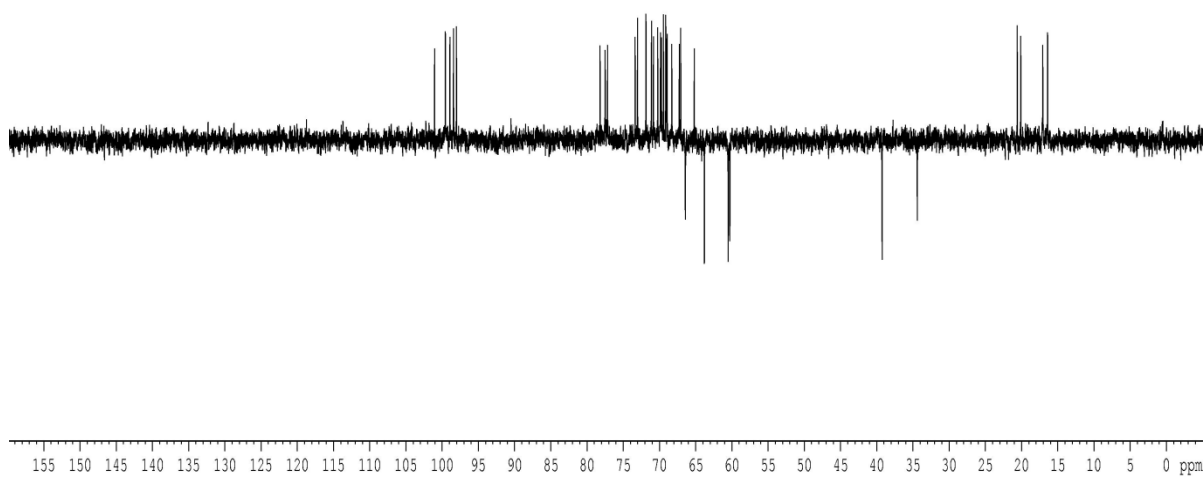

$^1\text{H}$ ,  $^{13}\text{C}$  and DEPT-135 NMR spectra of 2-azidoethyl (3,6-dideoxy- $\alpha$ -D-ribo-hexopyranosyl)-(1 $\rightarrow$ 3)-( $\alpha$ -D-mannopyranosyl)-(1 $\rightarrow$ 4)-(2,3-di-O-acetyl- $\alpha$ -L-rhamnopyranosyl)-(1 $\rightarrow$ 3)-[( $\alpha$ -D-glucopyranosyl)-(1 $\rightarrow$ 6)]- $\alpha$ -D-galactopyranoside (**2**) ( $\text{D}_2\text{O}$ , 500 MHz).

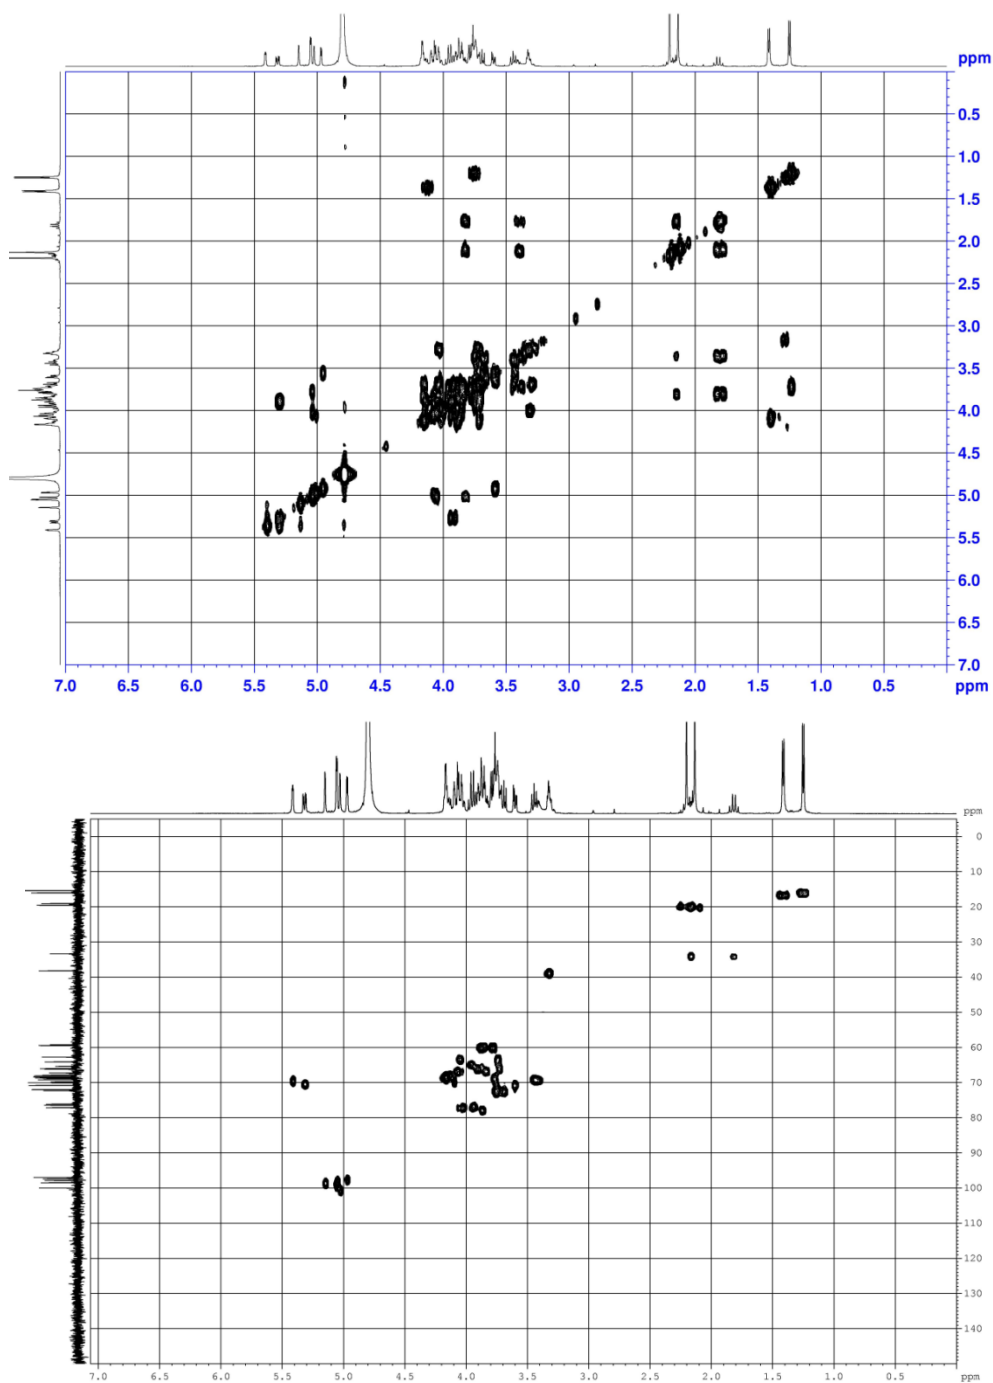

2D COSY and HSQC NMR spectra of 2-azidoethyl (3,6-dideoxy- $\alpha$ -D-ribo-hexopyranosyl)-(1 $\rightarrow$ 3)-( $\alpha$ -D-mannopyranosyl)-(1 $\rightarrow$ 4)-(2,3-di-O-acetyl- $\alpha$ -L-rhamnopyranosyl)-(1 $\rightarrow$ 3)-[( $\alpha$ -D-glucopyranosyl)-(1 $\rightarrow$ 6)]- $\alpha$ -D-galactopyranoside (**2**) (D<sub>2</sub>O, 500 MHz).

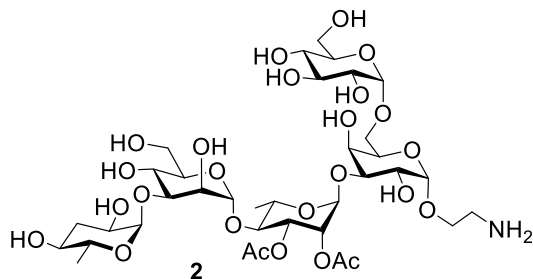

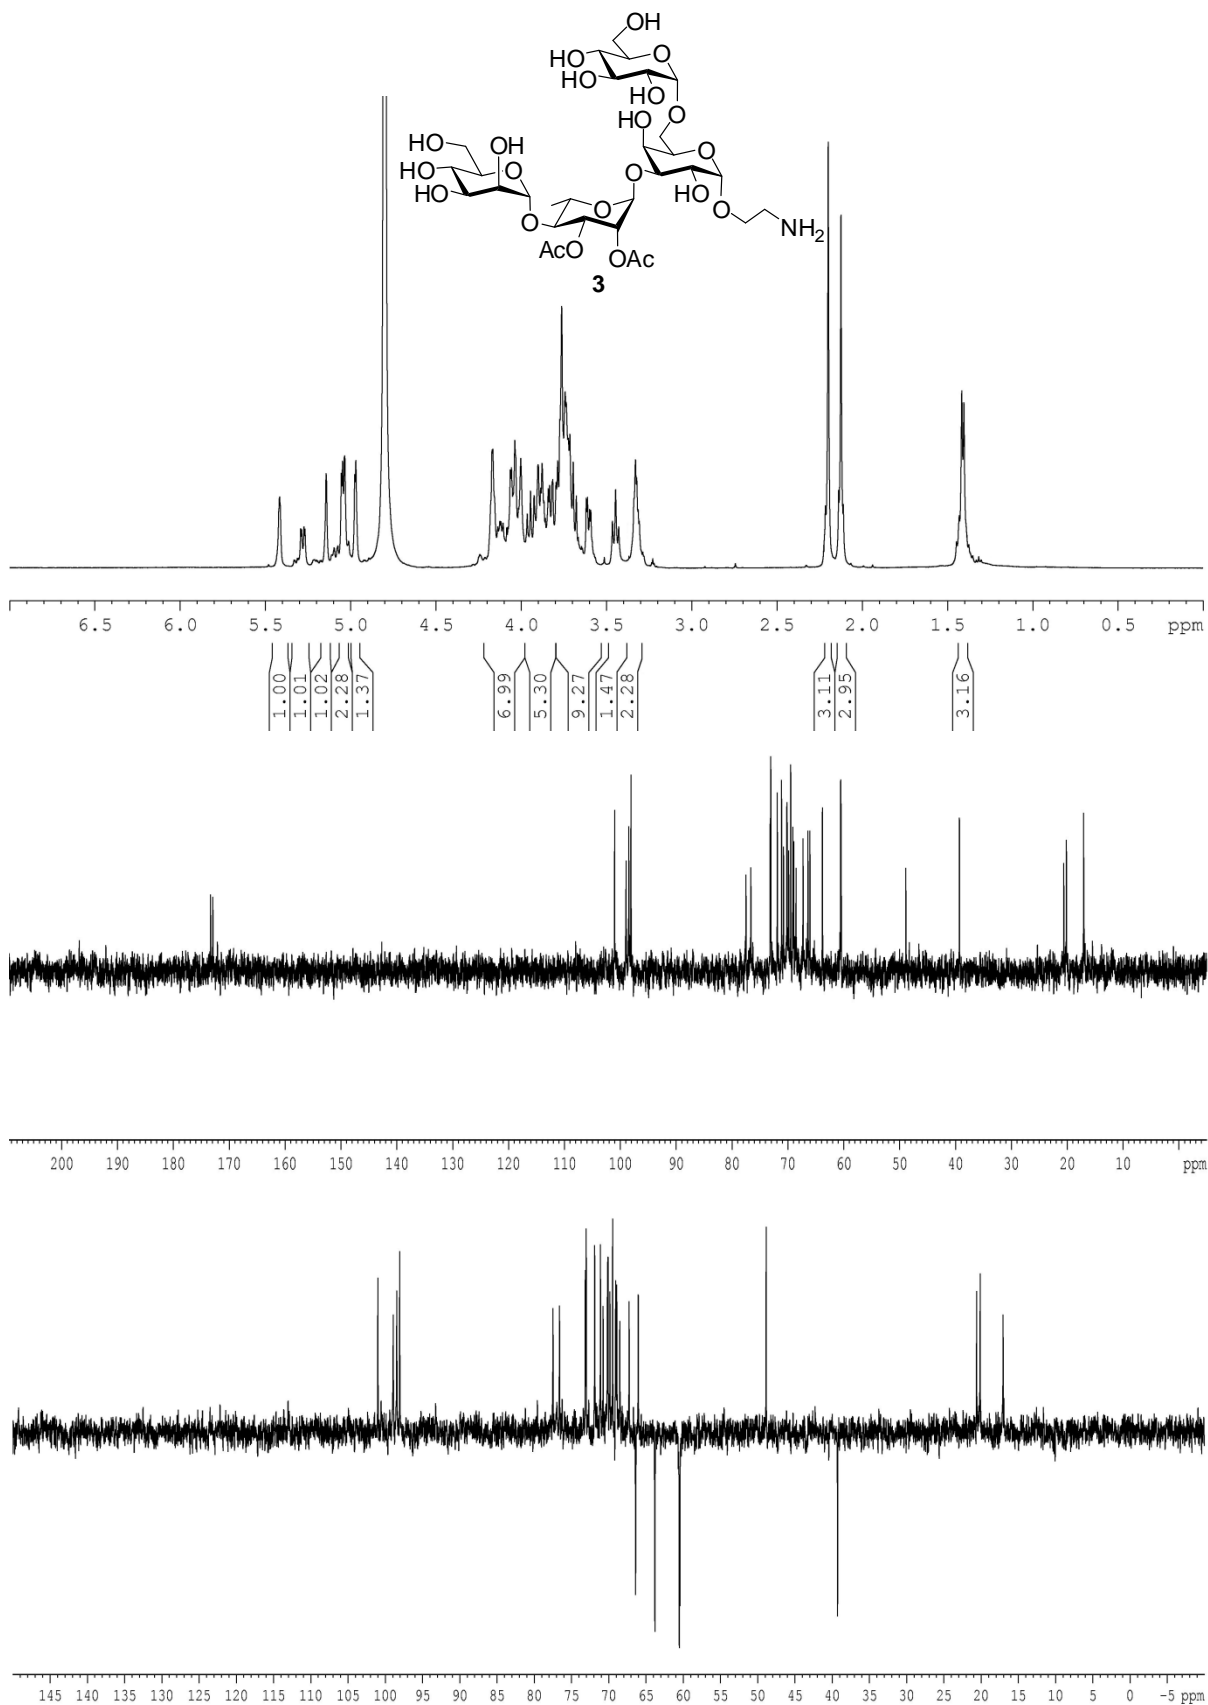

$^1\text{H}$ ,  $^{13}\text{C}$  and DEPT-135 NMR spectra of 2-azidoethyl ( $\alpha$ -D-mannopyranosyl)-(1 $\rightarrow$ 4)-(2,3-di-O-acetyl- $\alpha$ -L-rhamnopyranosyl)-(1 $\rightarrow$ 3)-[ $\alpha$ -D-glucopyranosyl)-(1 $\rightarrow$ 6)]- $\alpha$ -D-galactopyranoside (**3**)( $\text{D}_2\text{O}$ , 500 MHz).

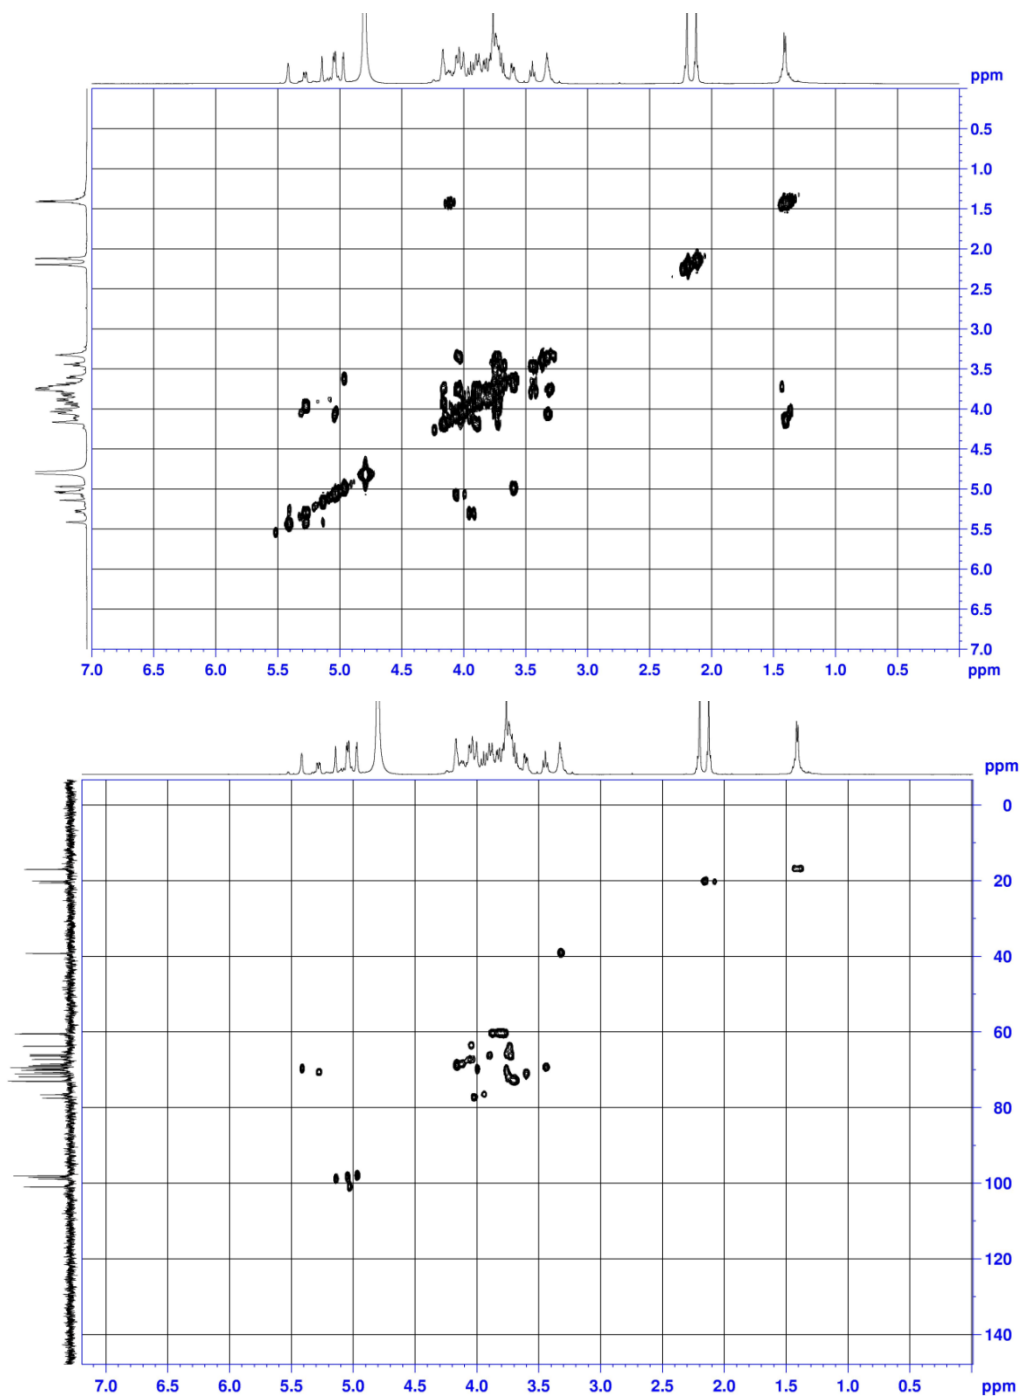

2D COSY and HSQC NMR spectra of 2-azidoethyl ( $\alpha$ -D-mannopyranosyl)-(1 $\rightarrow$ 4)-(2,3-di-O-acetyl- $\alpha$ -L-rhamnopyranosyl)-(1 $\rightarrow$ 3)-[( $\alpha$ -D-glucopyranosyl)-(1 $\rightarrow$ 6)]- $\alpha$ -D-galactopyranoside (**3**)(D<sub>2</sub>O, 500 MHz).

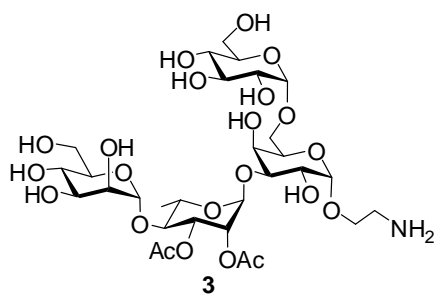

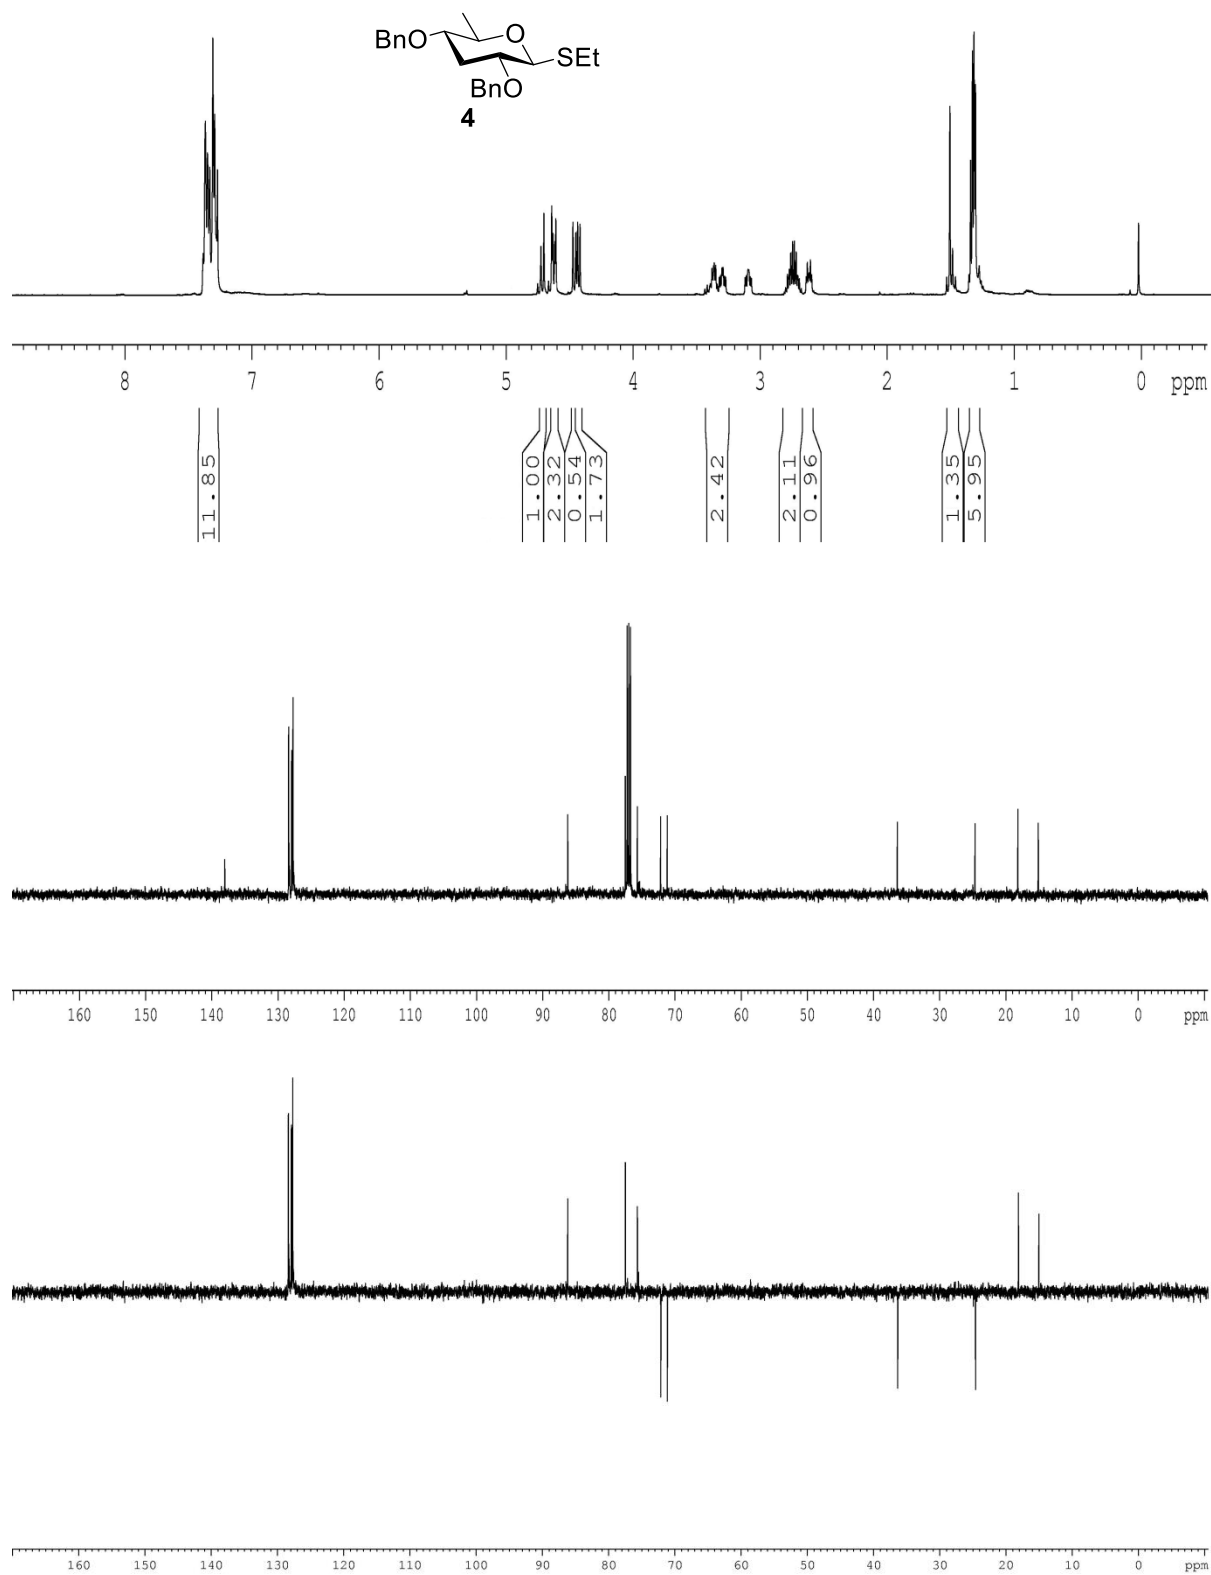

$^1\text{H}$ ,  $^{13}\text{C}$  and DEPT-135 NMR spectra of ethyl 2,4-di-*O*-benzyl-3,6-dideoxy-1-thio- $\beta$ -D-ribohexopyranoside (**4**) ( $\text{CDCl}_3$ , 500 MHz).

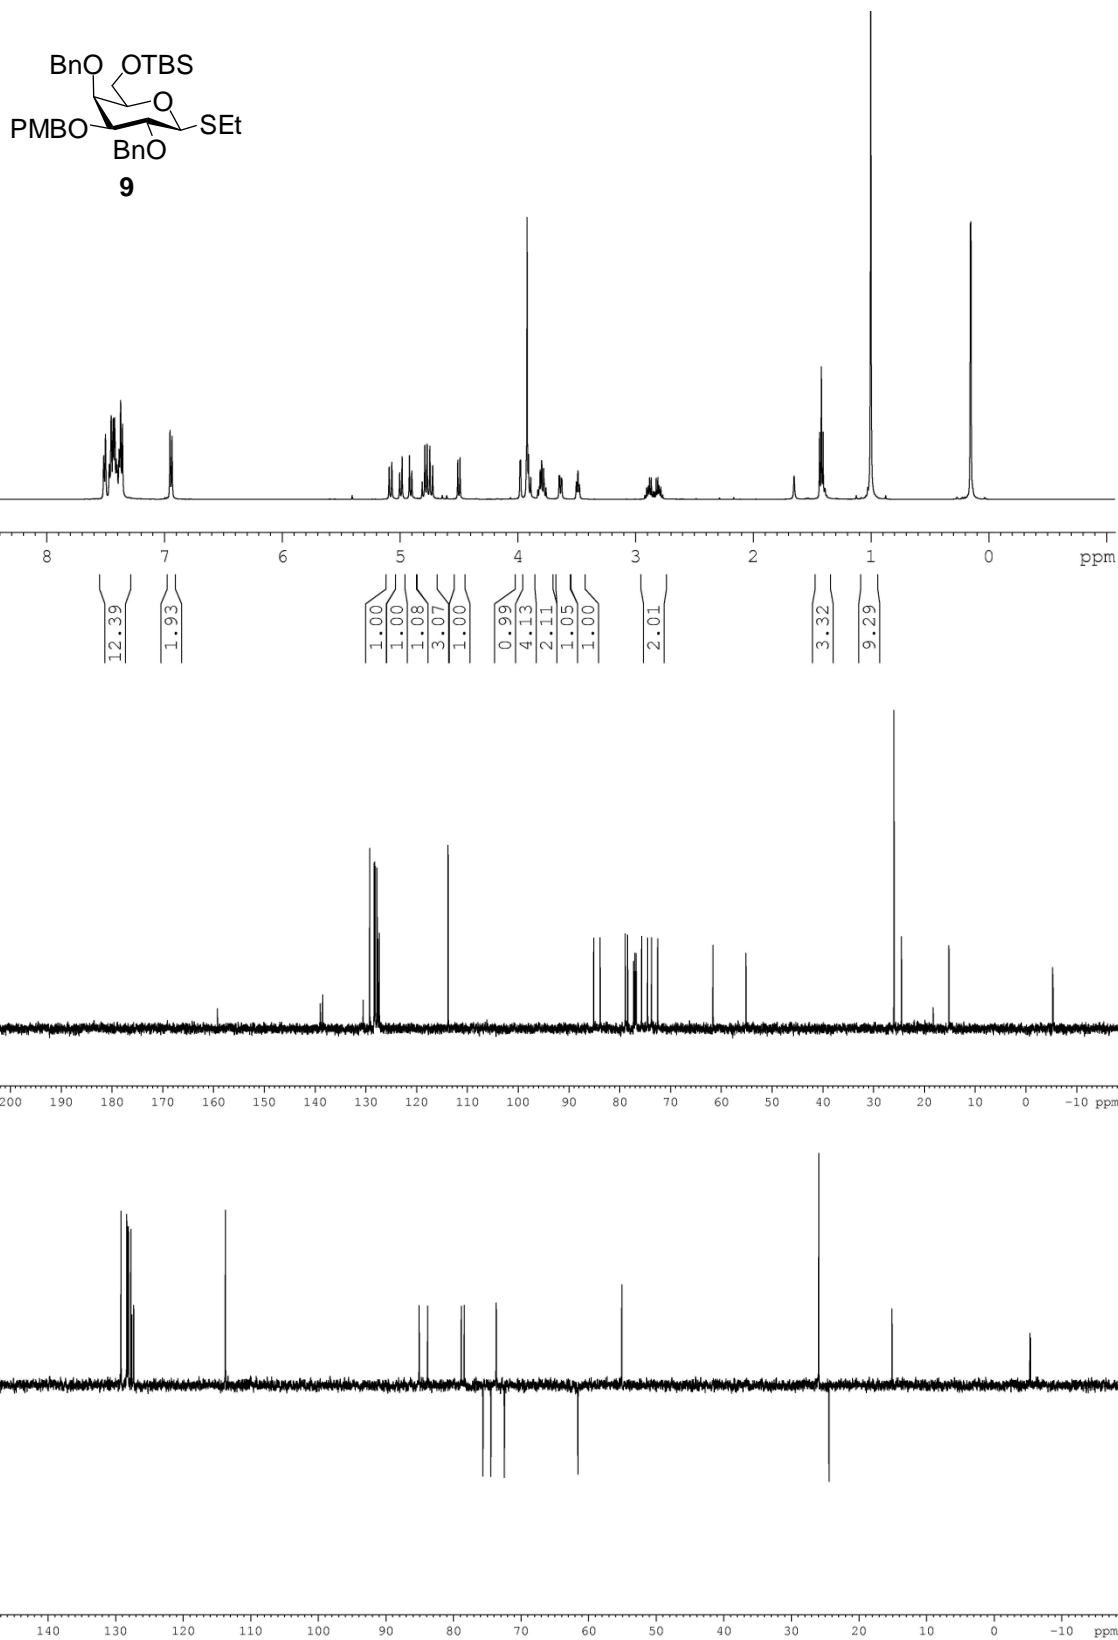

$^1\text{H}$ ,  $^{13}\text{C}$  and DEPT-135 NMR spectra of ethyl 2,4-di-*O*-benzyl-3-*O*-*p*-methoxybenzyl-6-*O*-(tert-butyltrimethylsilyl)-1-thio- $\beta$ -D-galactopyranoside(**9**) ( $\text{CDCl}_3$ , 500 MHz).



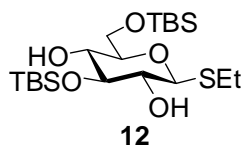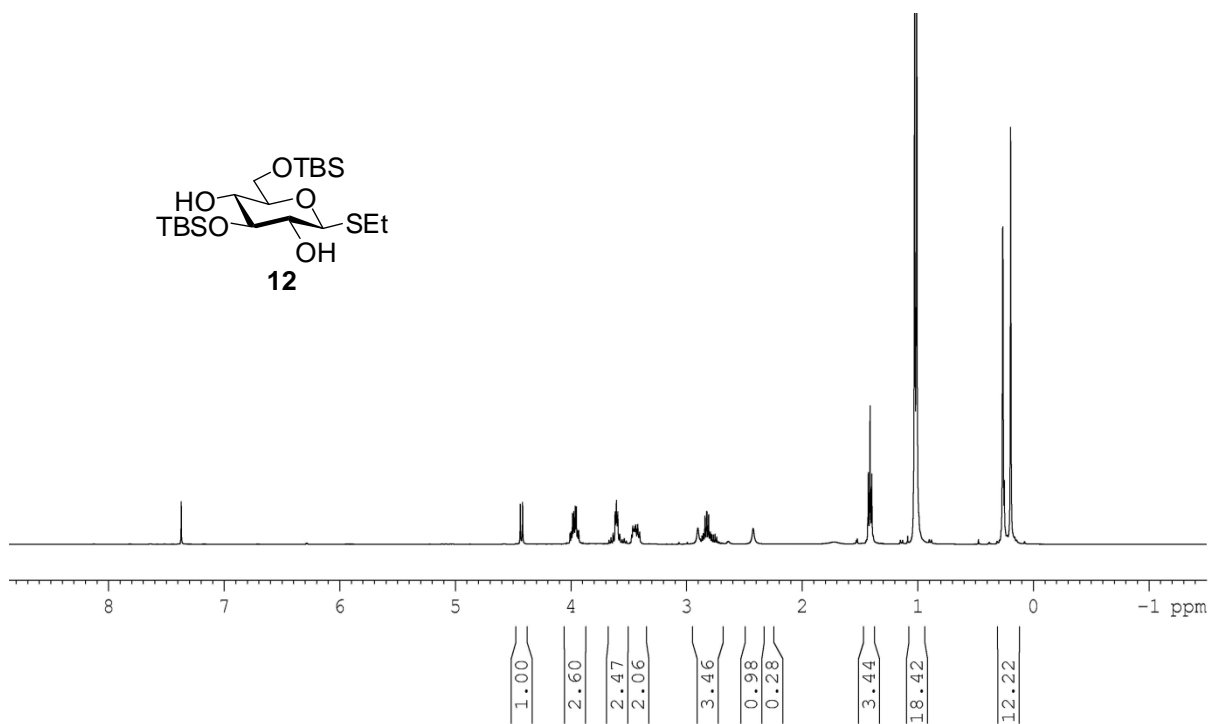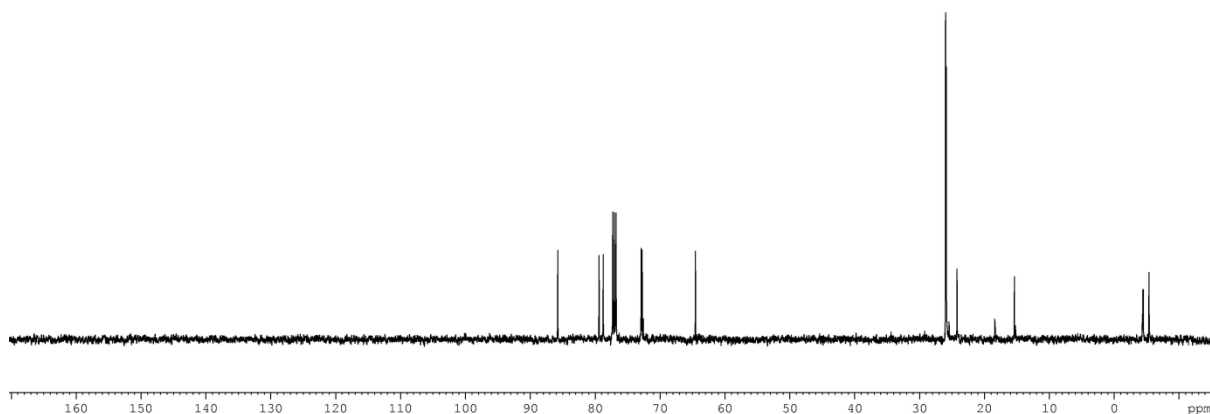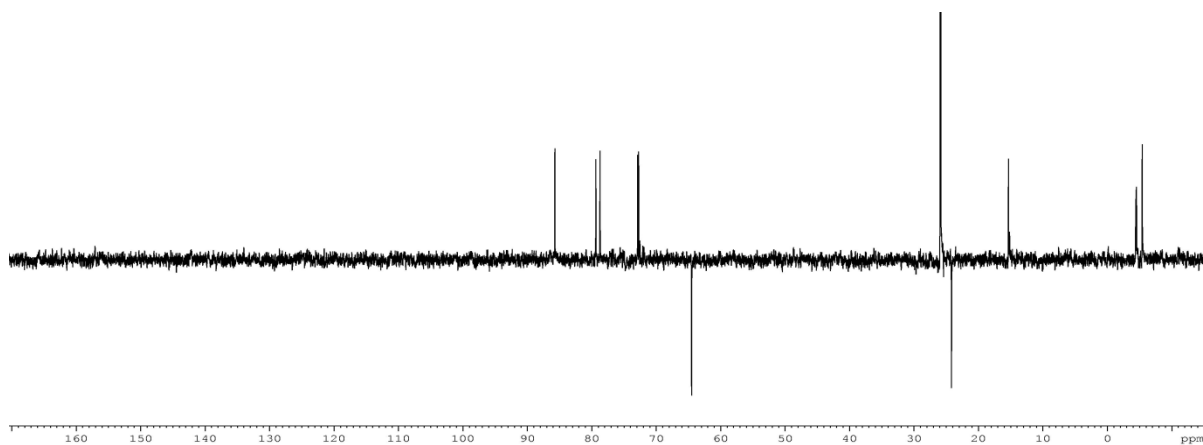

$^1\text{H}$ ,  $^{13}\text{C}$  and DEPT-135 NMR spectra of ethyl 3,6-di-*O*-(tert-butyldimethylsilyl)-1-thio- $\beta$ -D-glucopyranoside (**12**)( $\text{CDCl}_3$ , 500 MHz).

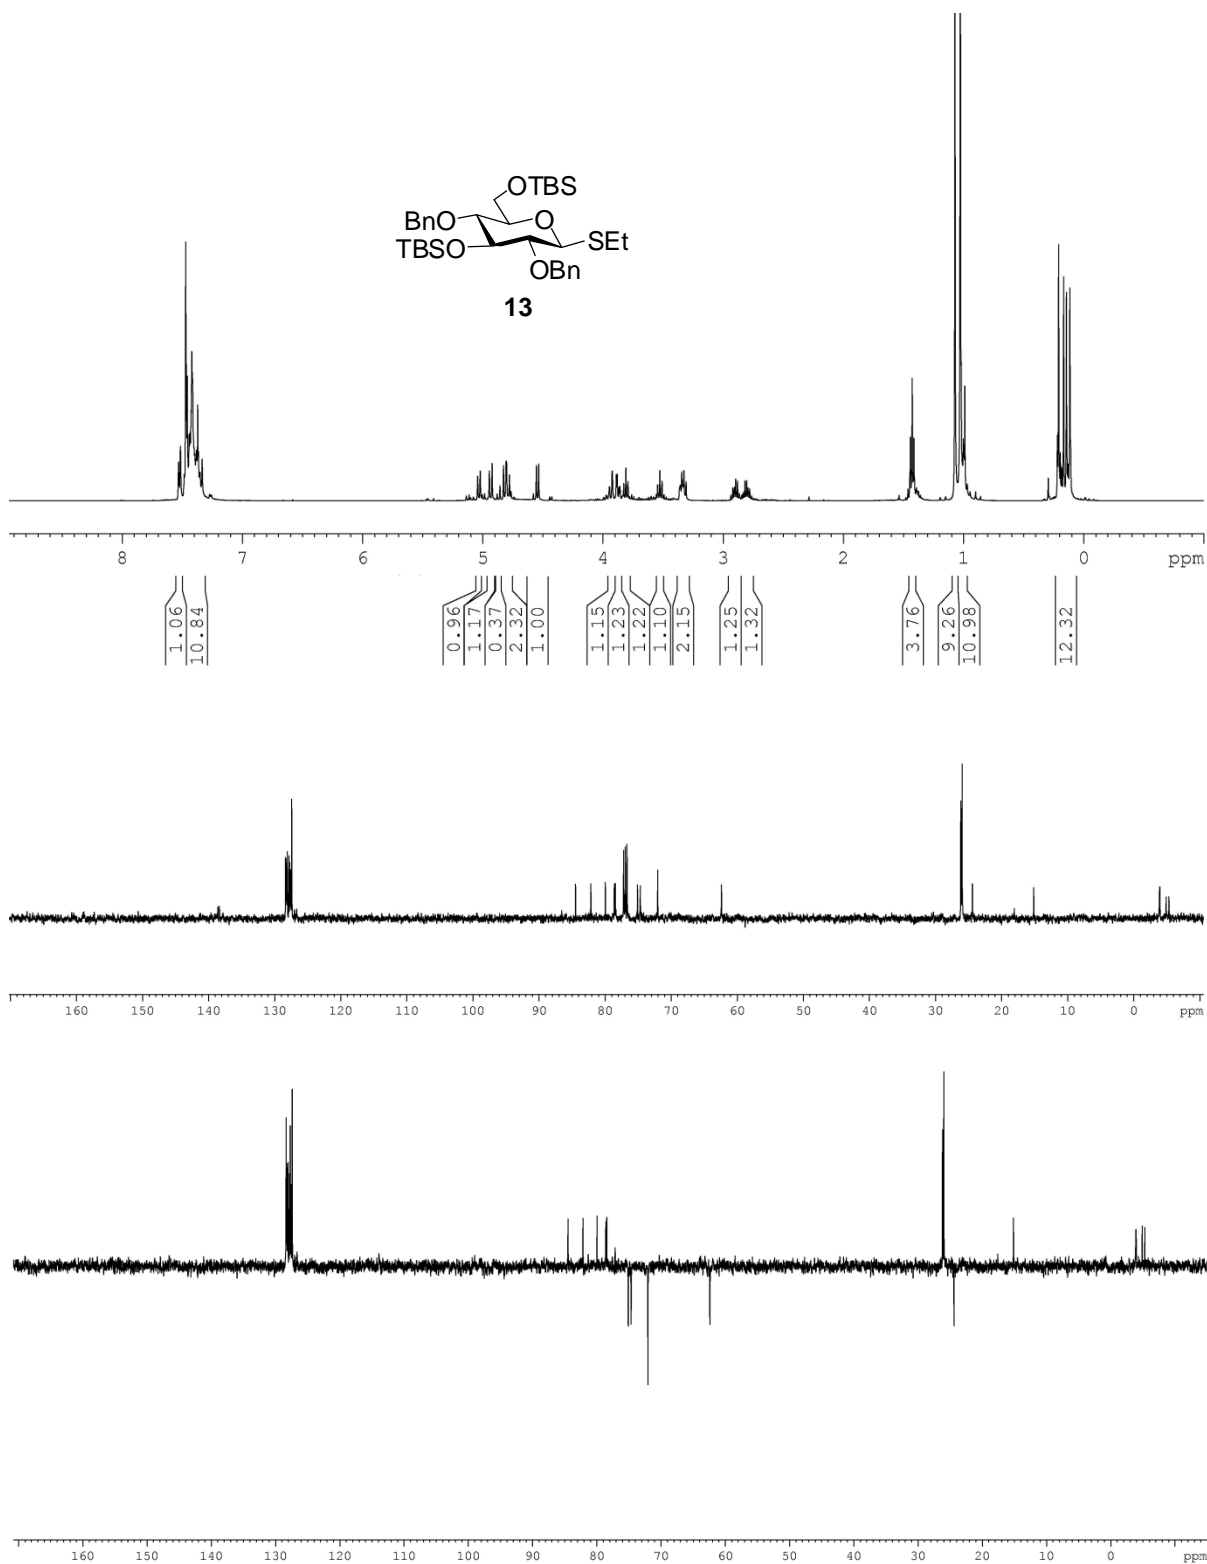

<sup>1</sup>H, <sup>13</sup>C and DEPT-135 NMR spectra of ethyl 2,4-di-O-benzyl-3,6-di-O-(tert-butyl dimethylsilyl)-1-thio-β-D-glucopyranoside (**13**) (CDCl<sub>3</sub>, 500 MHz).

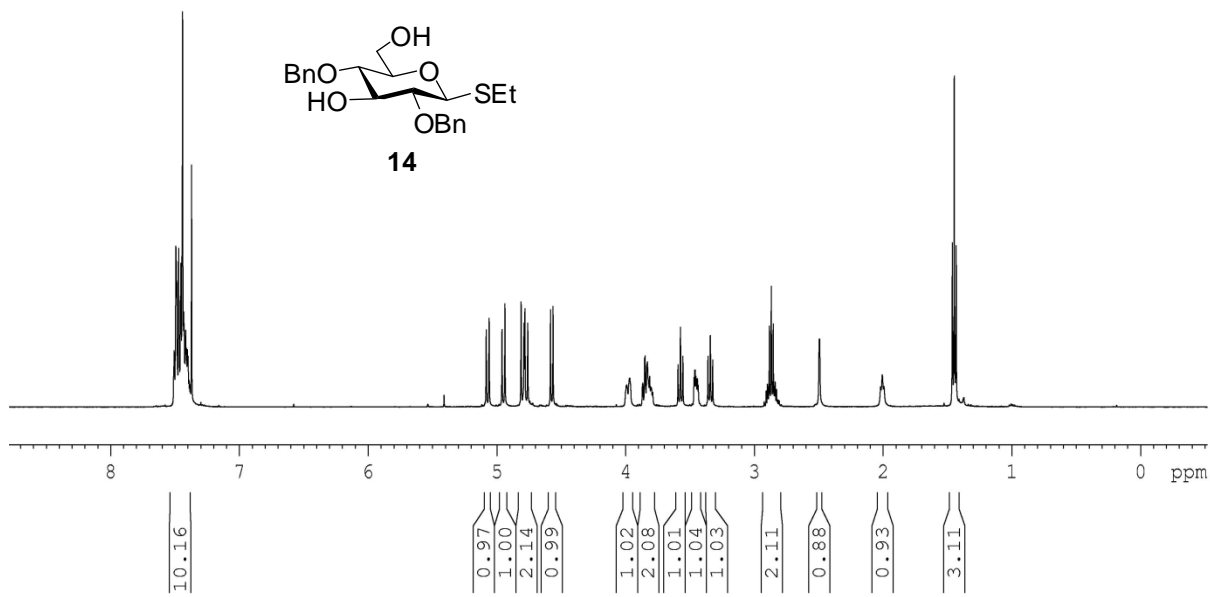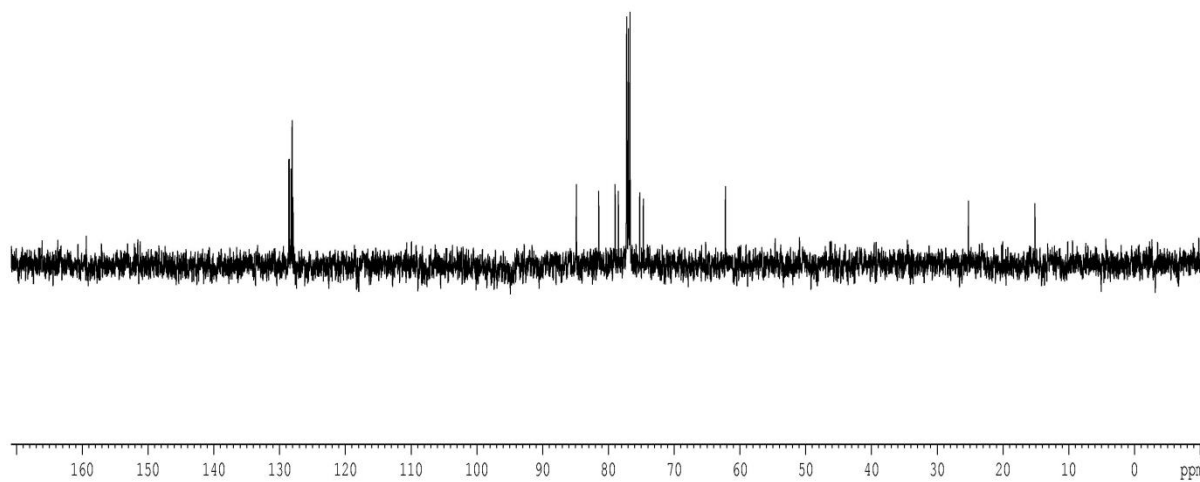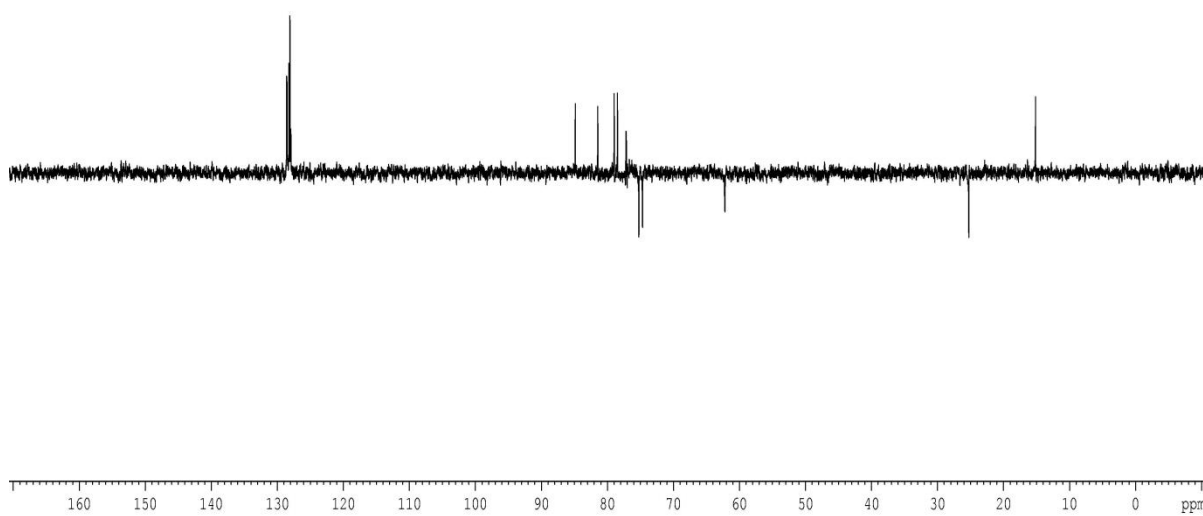

$^1\text{H}$ ,  $^{13}\text{C}$  and DEPT-135 NMR spectra of ethyl 2,4-di-*O*-benzyl-1-thio- $\alpha$ -D-glucopyranoside (**14**) ( $\text{CDCl}_3$ , 500 MHz).

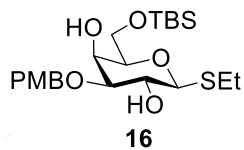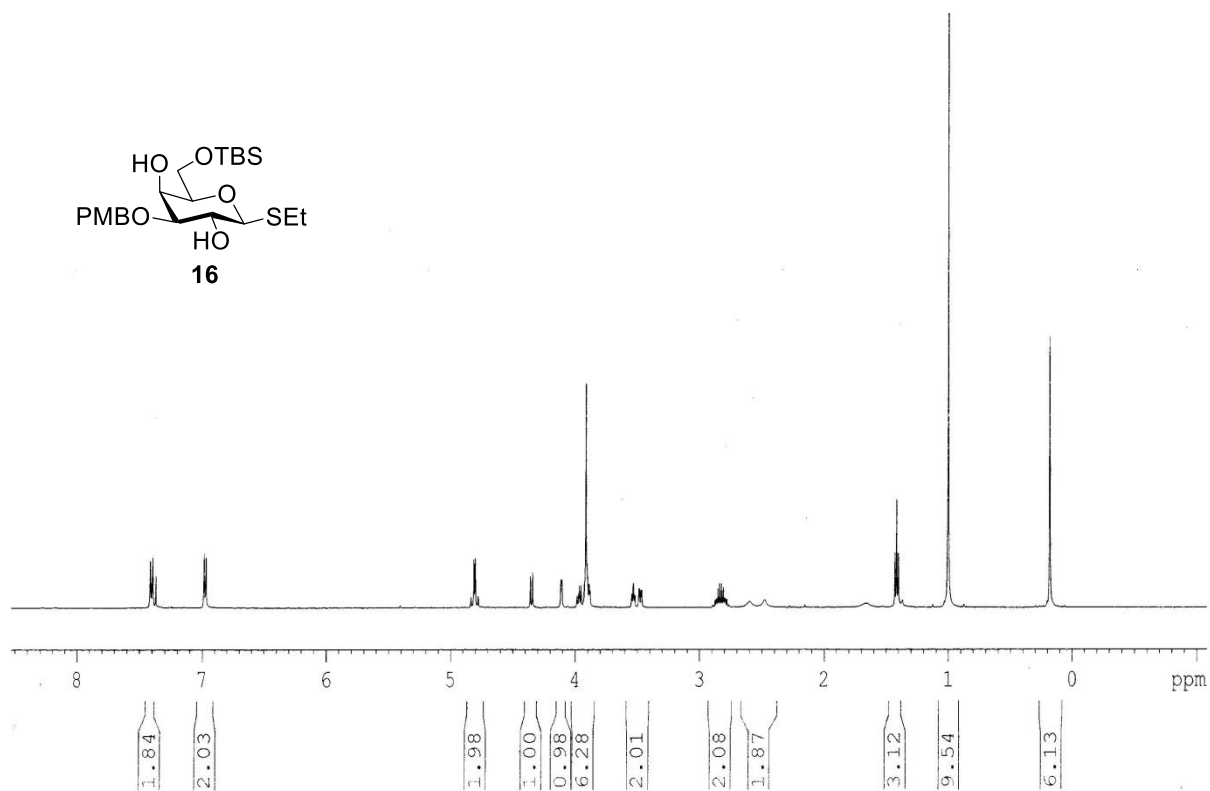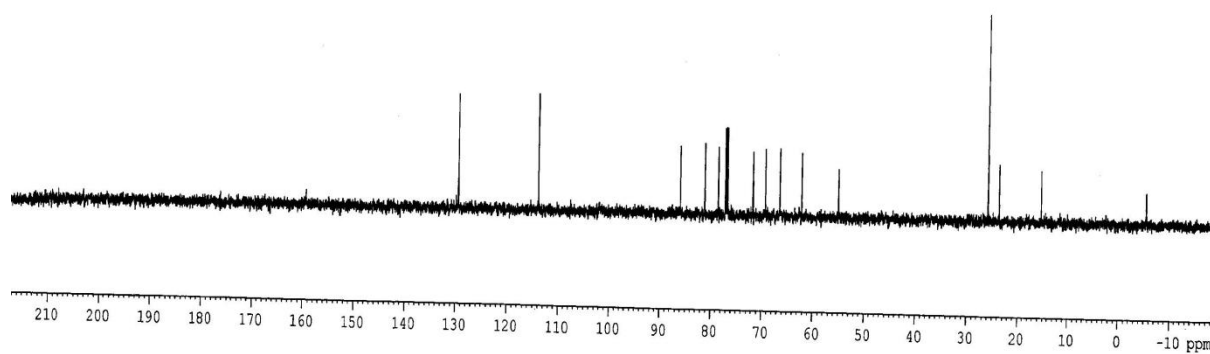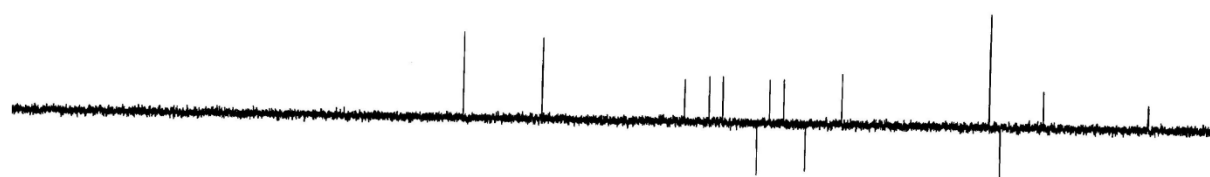

<sup>1</sup>H, <sup>13</sup>C and DEPT-135 NMR spectra of ethyl 3-*O*-*p*-methoxybenzyl-6-*O*-(tert-butyldimethylsilyl)-1-thio-β-D-galactopyranoside (**16**) (CDCl<sub>3</sub>, 500 MHz).

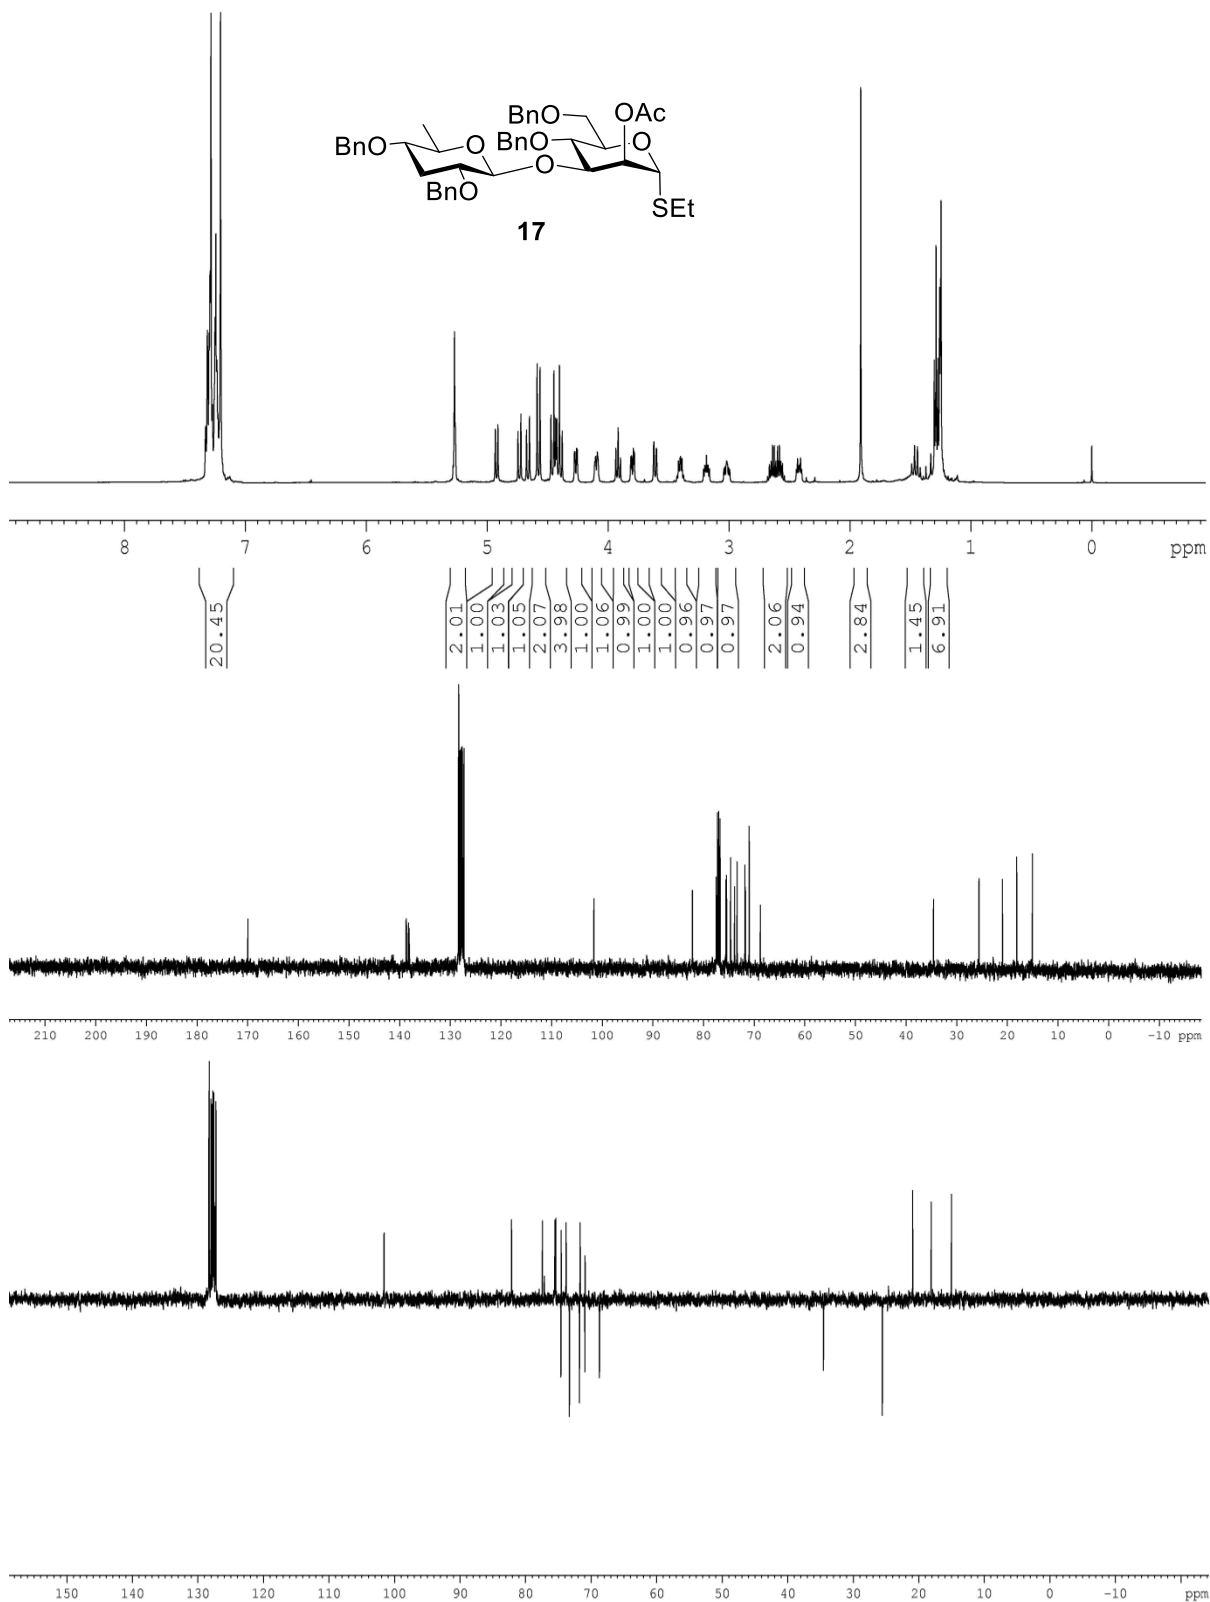

<sup>1</sup>H, <sup>13</sup>C and DEPT-135 NMR spectra of ethyl (2,4-di-*O*-benzyl-3,6-dideoxy- $\beta$ -D-ribohexopyranosyl)-(1 $\rightarrow$ 3)-2-*O*-acetyl-4,6-di-*O*-benzyl-1-thio- $\alpha$ -D-mannopyranoside (**17**) (CDCl<sub>3</sub>, 500 MHz).

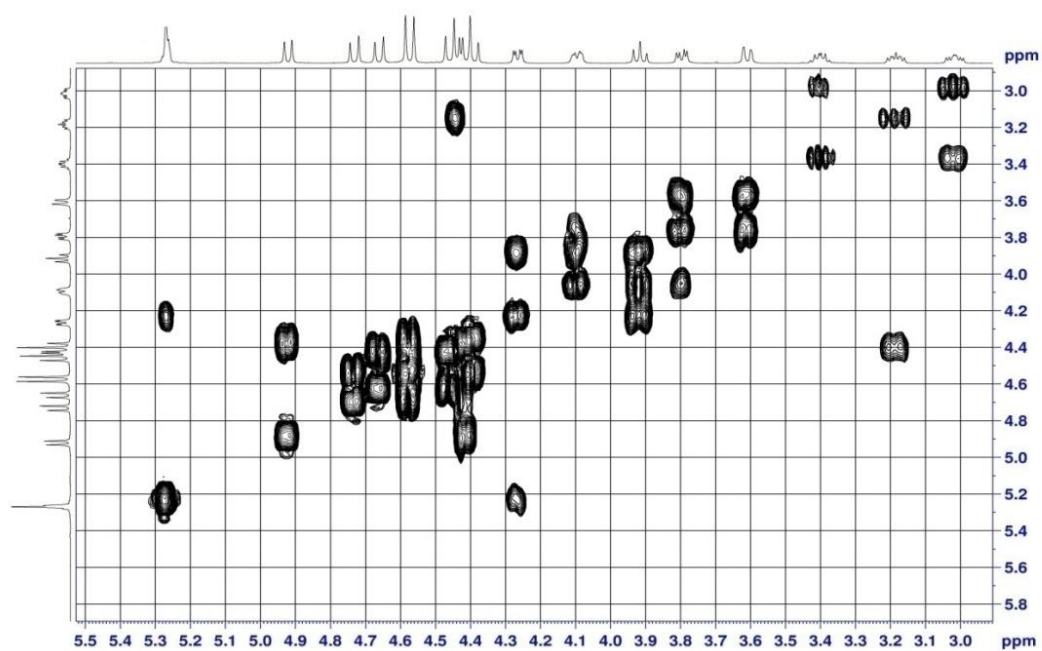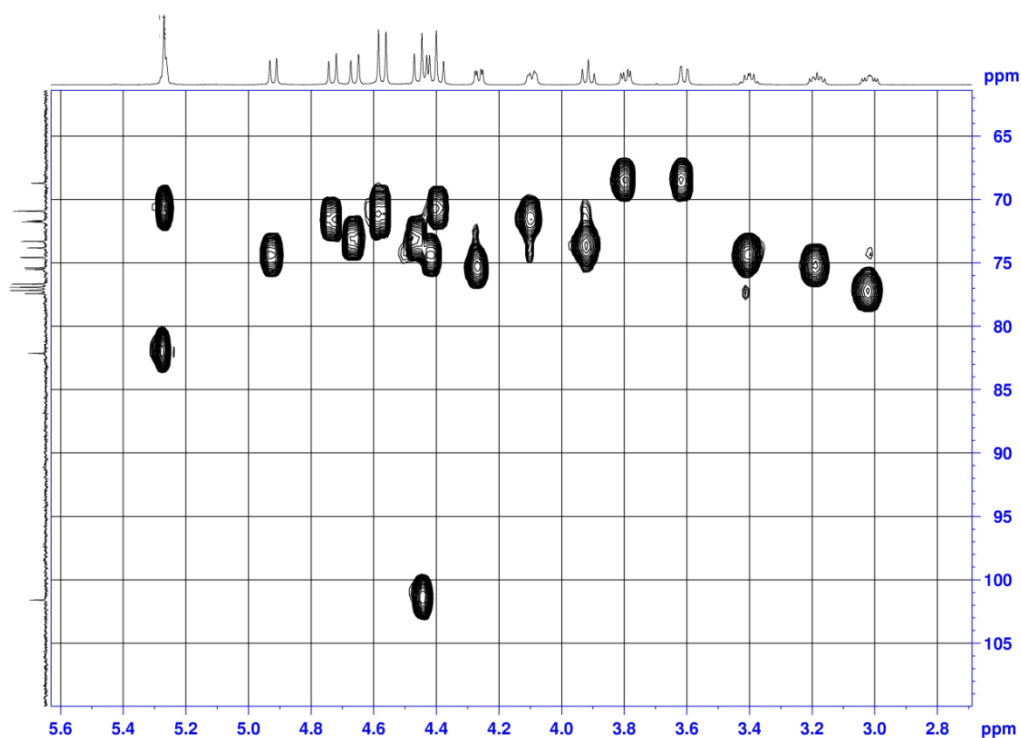

2D COSY and HMQC NMR spectra (selected regions) of ethyl (2,4-di-*O*-benzyl-3,6-dideoxy- $\beta$ -D-ribo-hexopyranosyl)-(1 $\rightarrow$ 3)-2-*O*-acetyl-4,6-di-*O*-benzyl-1-thio- $\alpha$ -D-mannopyranoside (**17**) (CDCl<sub>3</sub>, 500 MHz).

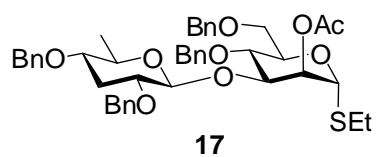

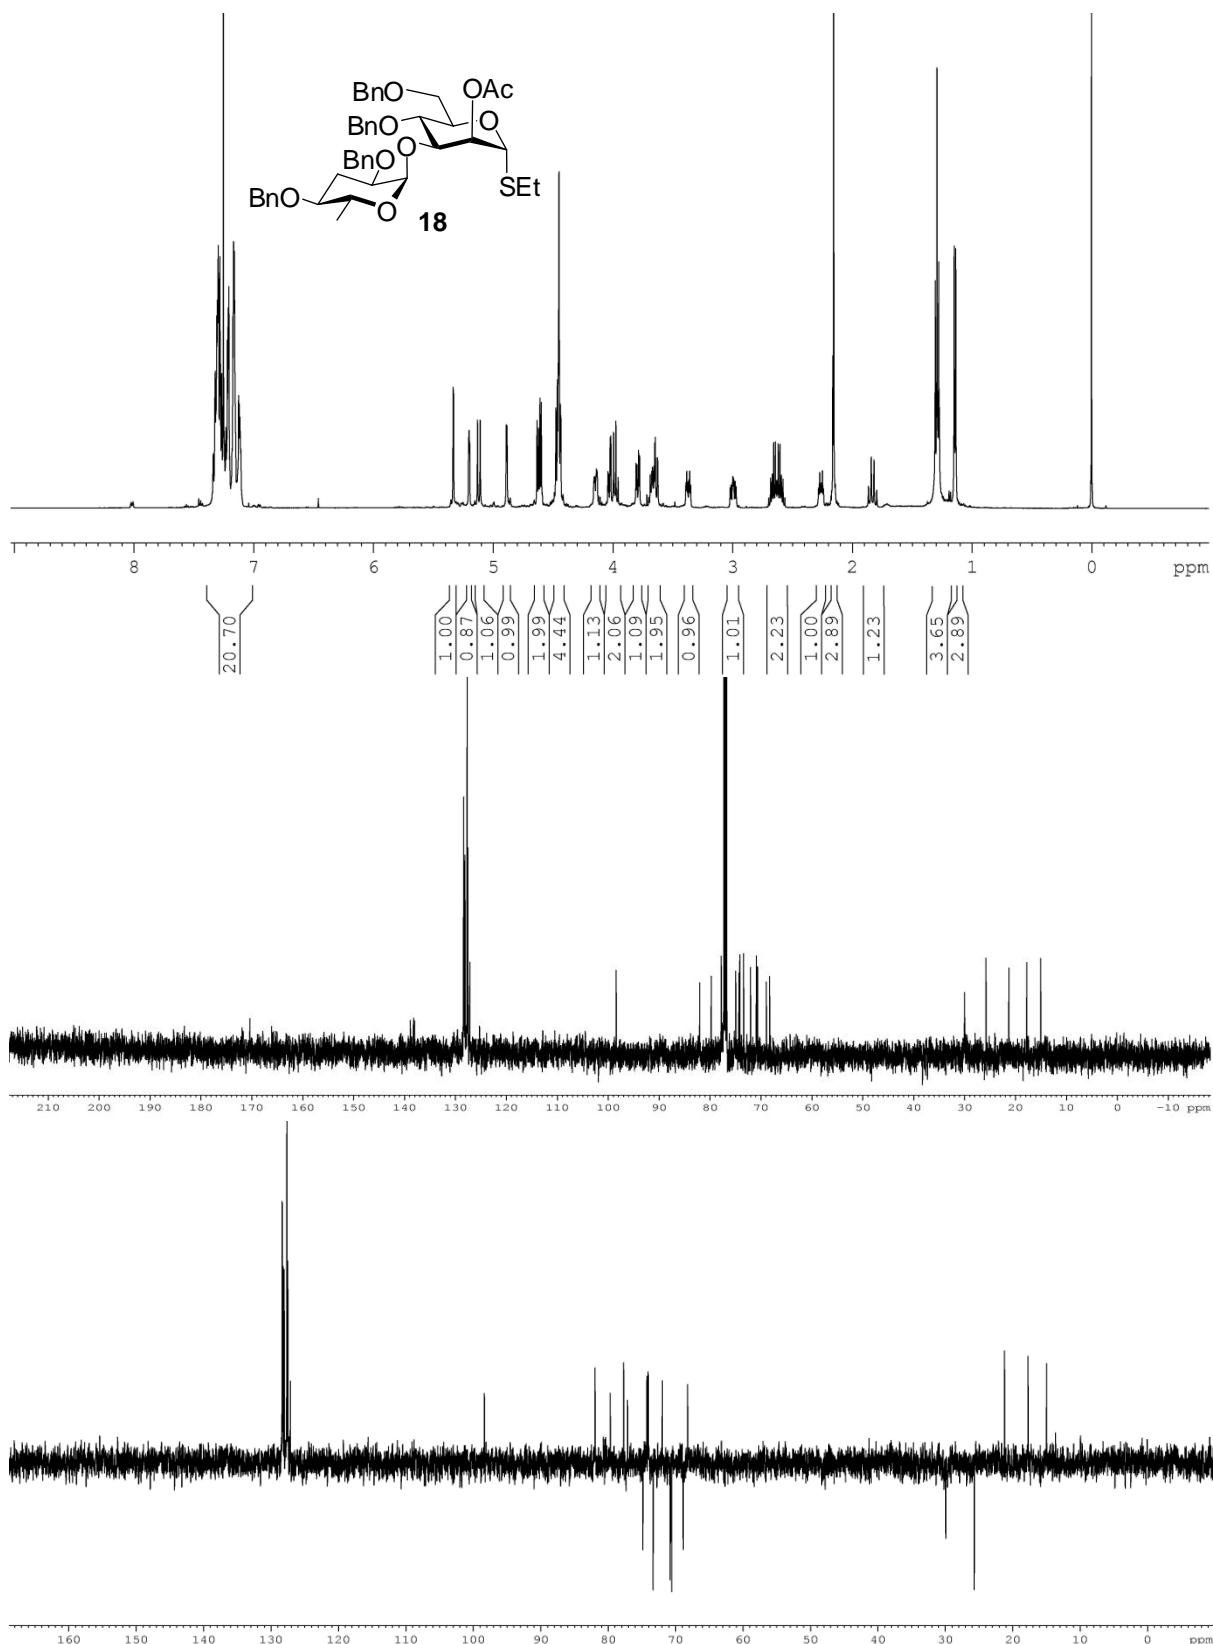

$^1\text{H}$ ,  $^{13}\text{C}$  and DEPT-135 NMR spectra of ethyl (2,4-di-*O*-benzyl-3,6-dideoxy- $\alpha$ -D-ribohexopyranosyl)-(1 $\rightarrow$ 3)-2-*O*-acetyl-4,6-di-*O*-benzyl-1-thio- $\alpha$ -D-mannopyranoside (**18**) ( $\text{CDCl}_3$ , 500 MHz).

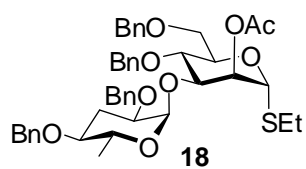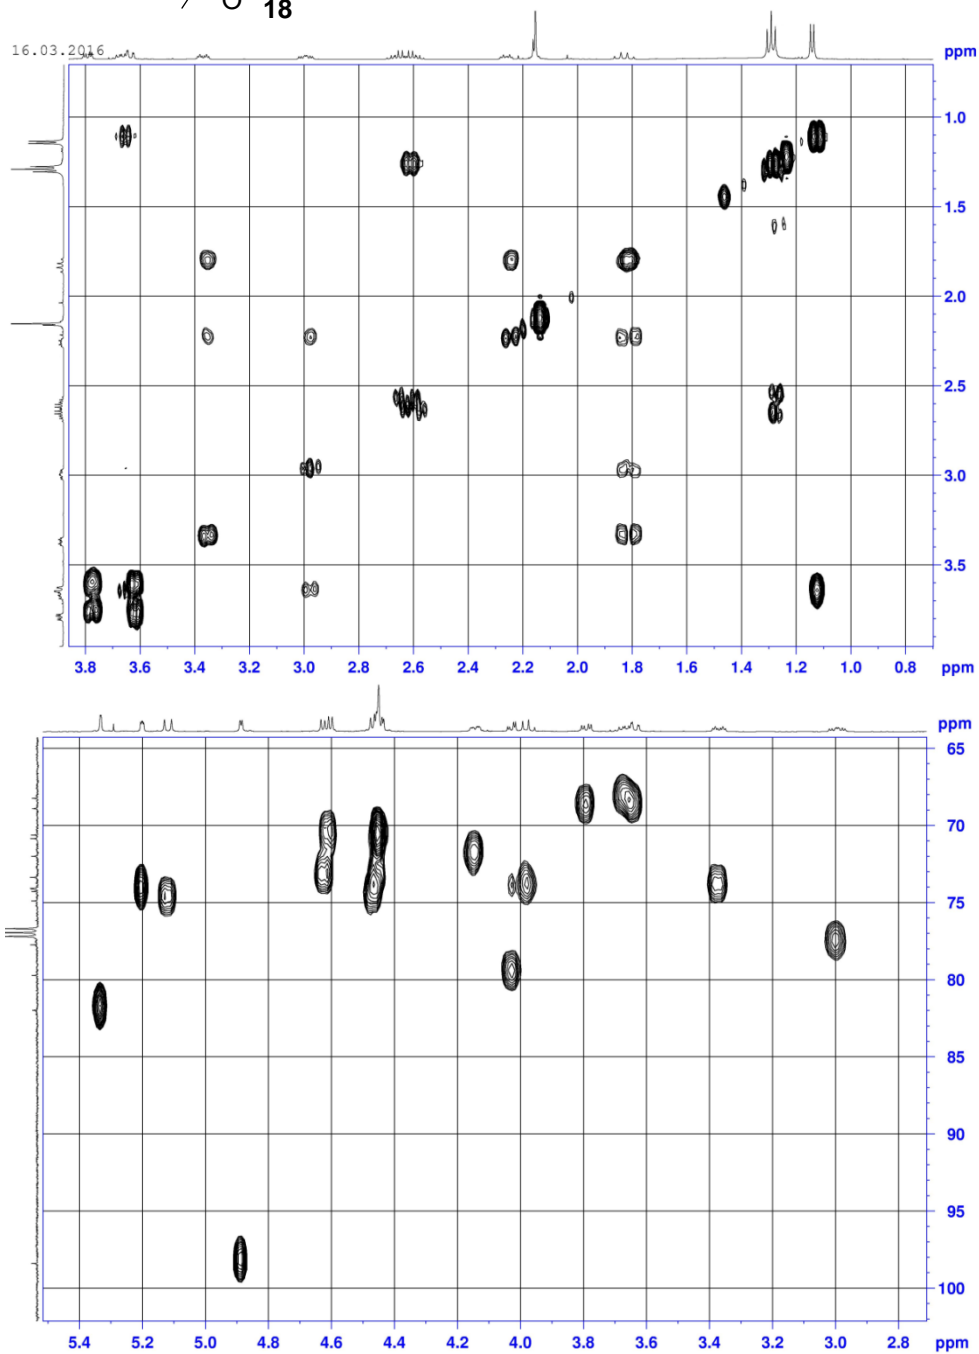

2D COSY and HMQC NMR spectra (selected regions) of ethyl (2,4-di-*O*-benzyl-3,6-dideoxy- $\alpha$ -D-ribo-hexopyranosyl)-(1 $\rightarrow$ 3)-2-*O*-acetyl-4,6-di-*O*-benzyl-1-thio- $\alpha$ -D-mannopyranoside (**18**) (CDCl<sub>3</sub>, 500 MHz).



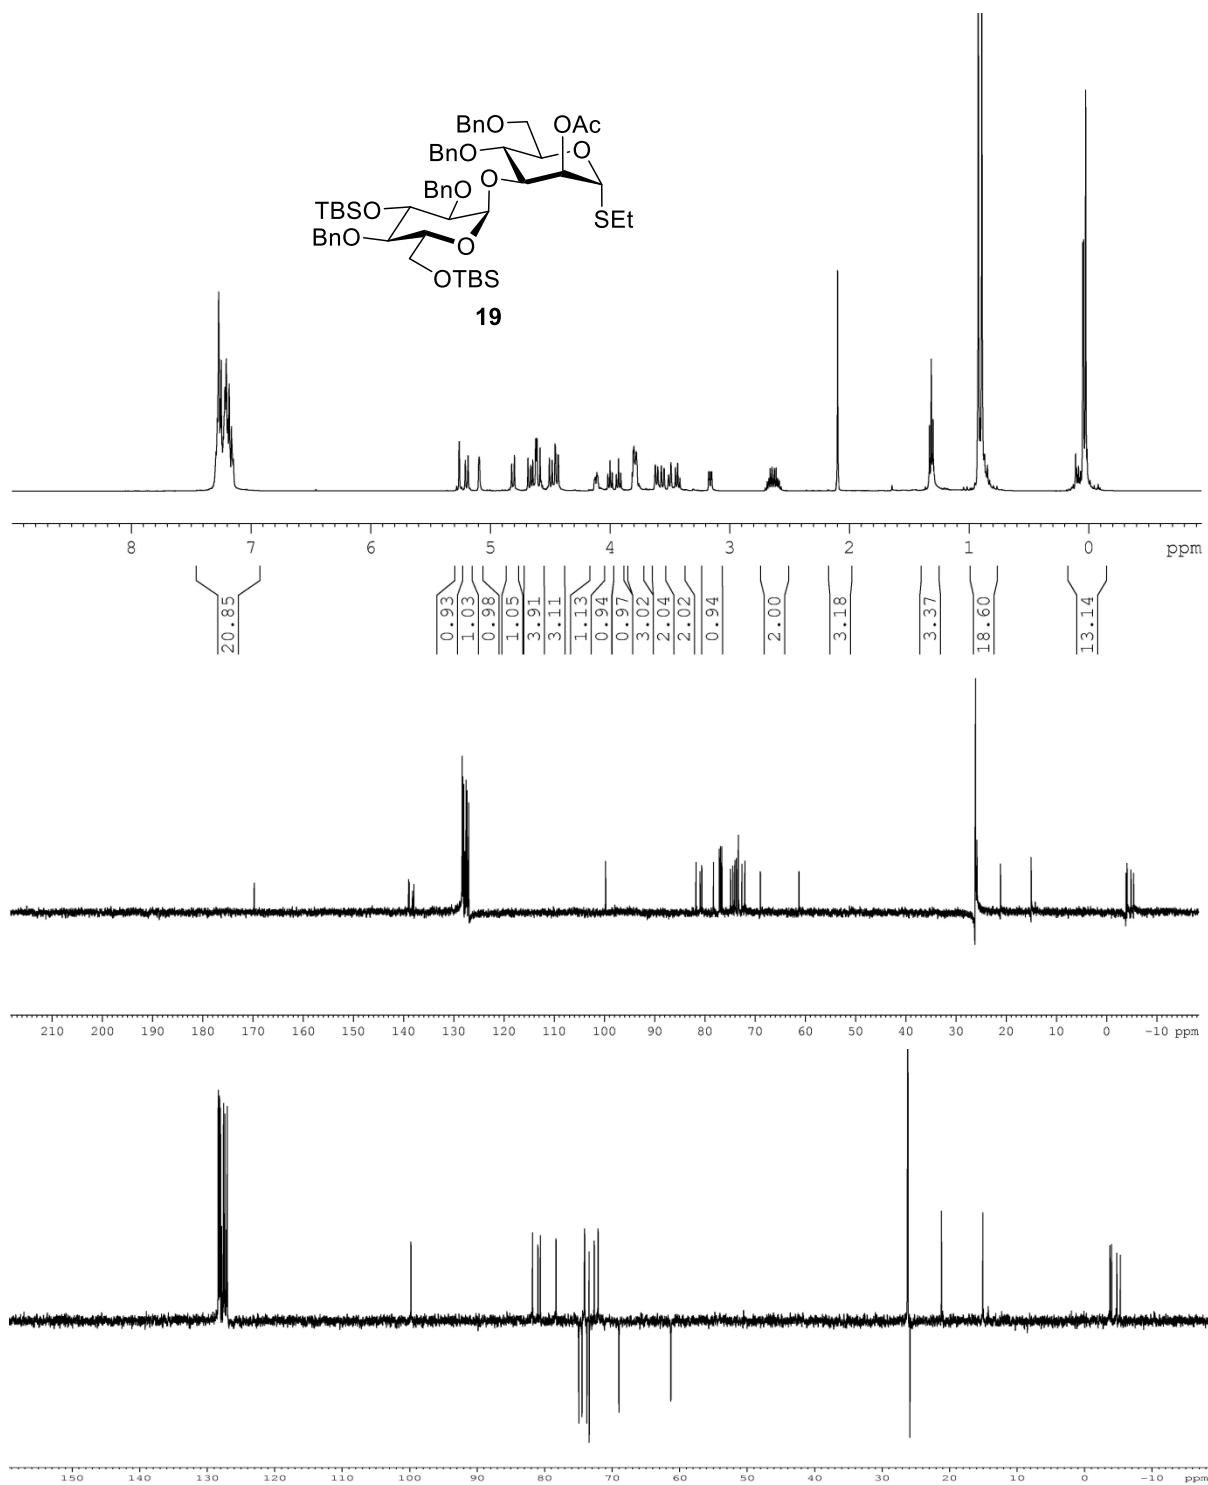

$^1\text{H}$ ,  $^{13}\text{C}$  and DEPT-135 NMR spectra of ethyl (2,4-di-*O*-benzyl-3,6-di-*O*-(tert-butyl-dimethylsilyl)- $\alpha$ -D-glucopyranosyl)-(1 $\rightarrow$ 3)-2-*O*-acetyl-4,6-di-*O*-benzyl-1-thio- $\alpha$ -D-mannopyranoside (**19**)( $\text{CDCl}_3$ , 500 MHz).

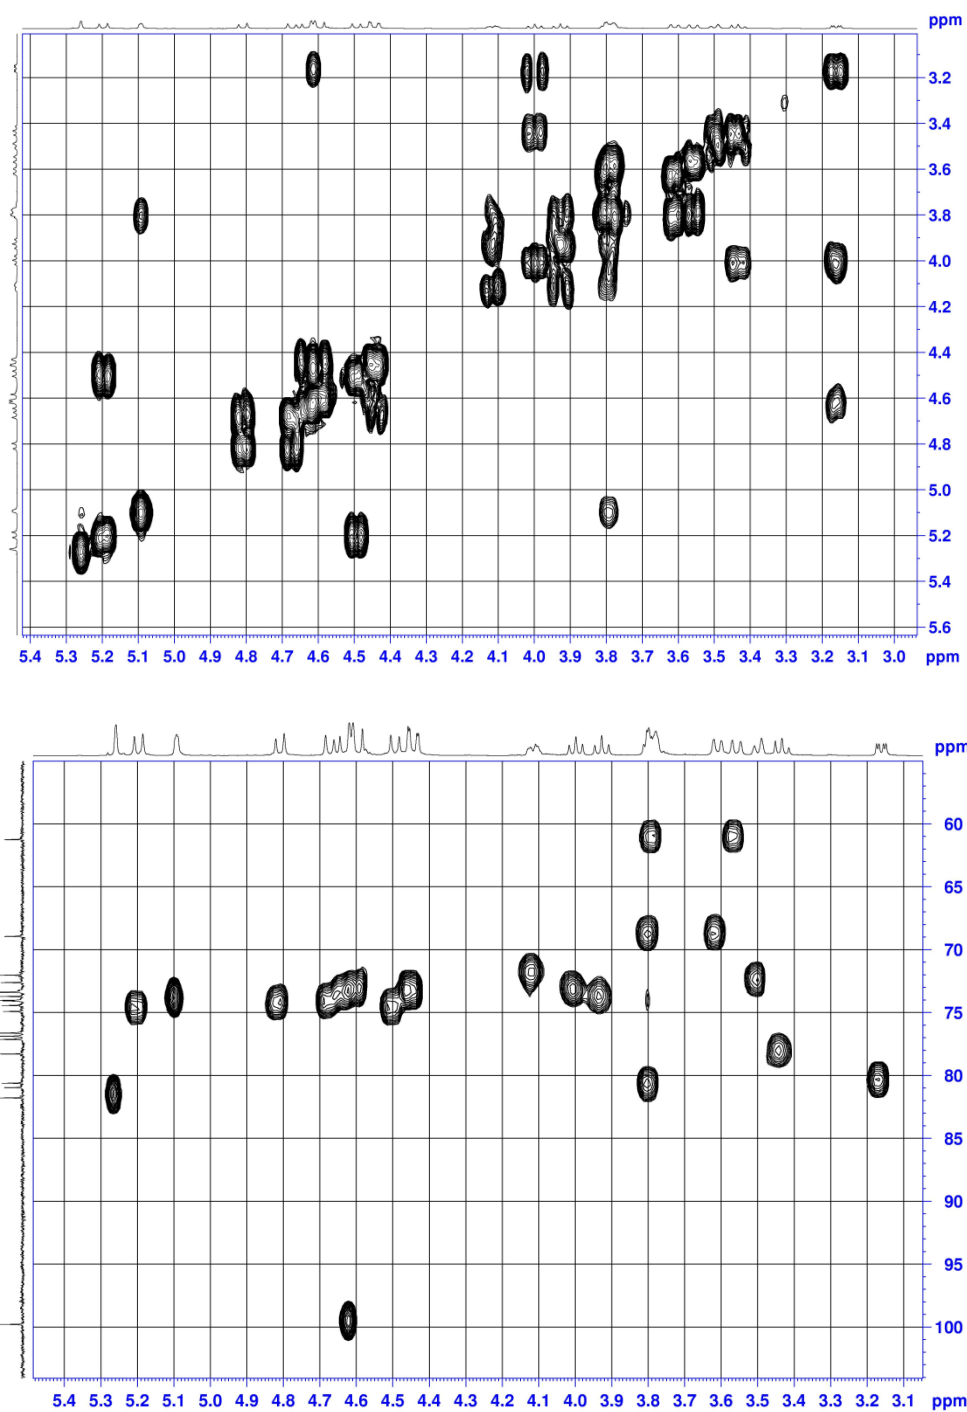

2D COSY and HSQC NMR spectra (selected regions) of ethyl (2,4-di-*O*-benzyl-3,6-di-*O*-(tert-butylidimethylsilyl)- $\alpha$ -D-glucopyranosyl)-(1 $\rightarrow$ 3)-2-*O*-acetyl-4,6-di-*O*-benzyl-1-thio- $\alpha$ -D-mannopyranoside (**19**)(CDCl<sub>3</sub>, 500 MHz).

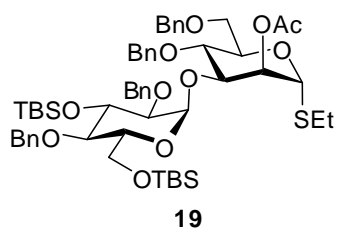

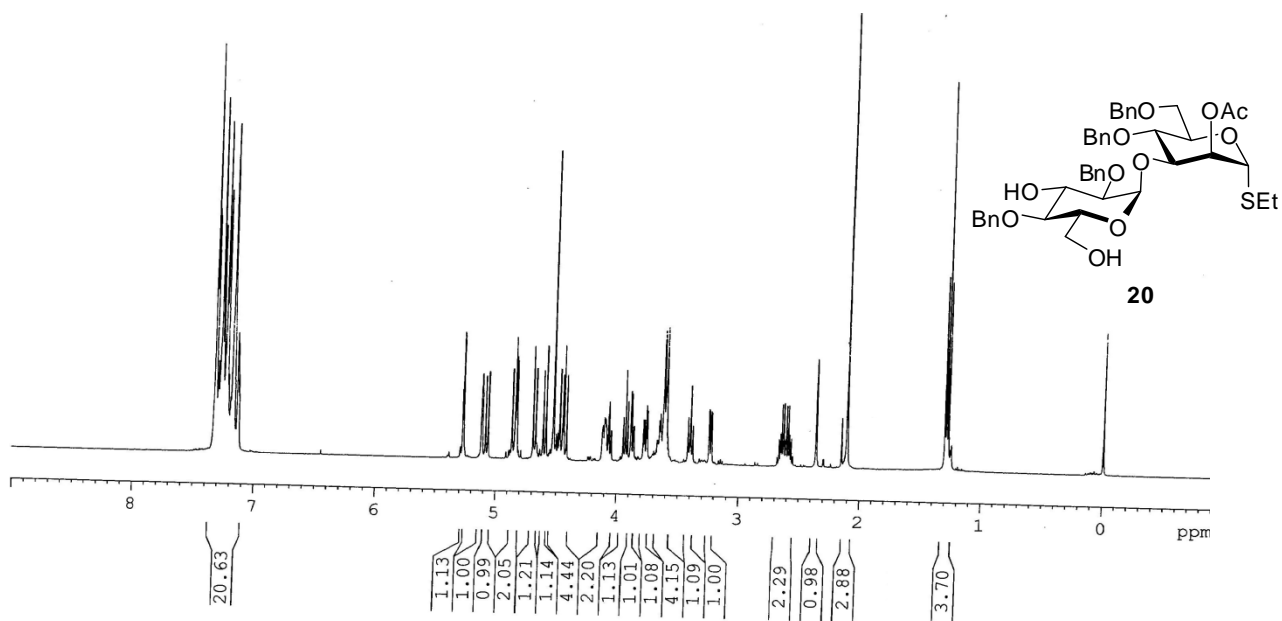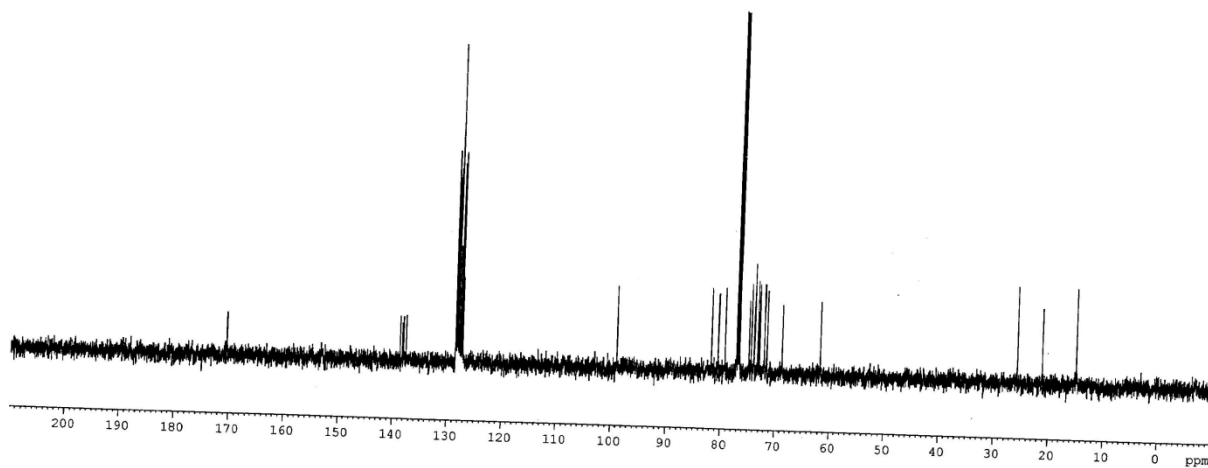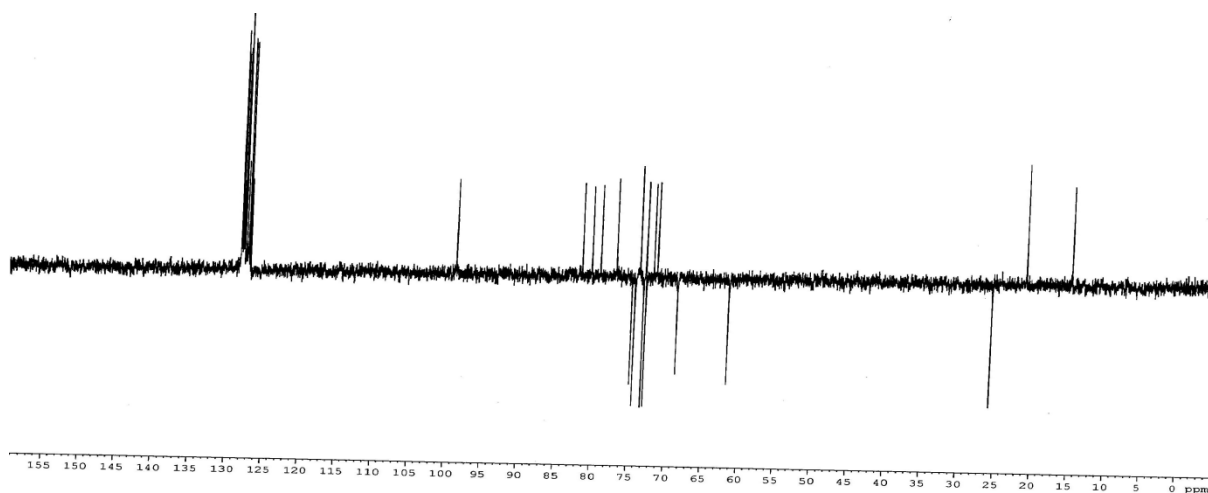

$^1\text{H}$ ,  $^{13}\text{C}$  and DEPT-135 NMR spectra of ethyl (2,4-di-*O*-benzyl- $\alpha$ -D-glucopyranosyl)-(1 $\rightarrow$ 3)-2-*O*-acetyl-4,6-di-*O*-benzyl-1-thio- $\alpha$ -D-mannopyranoside (**20**)( $\text{CDCl}_3$ , 500 MHz).

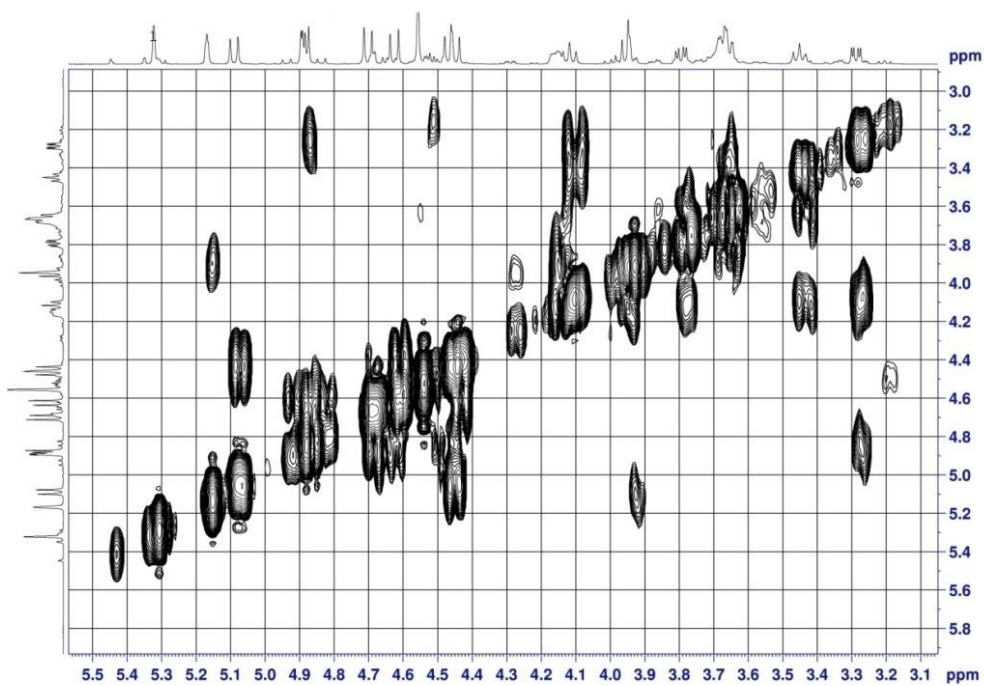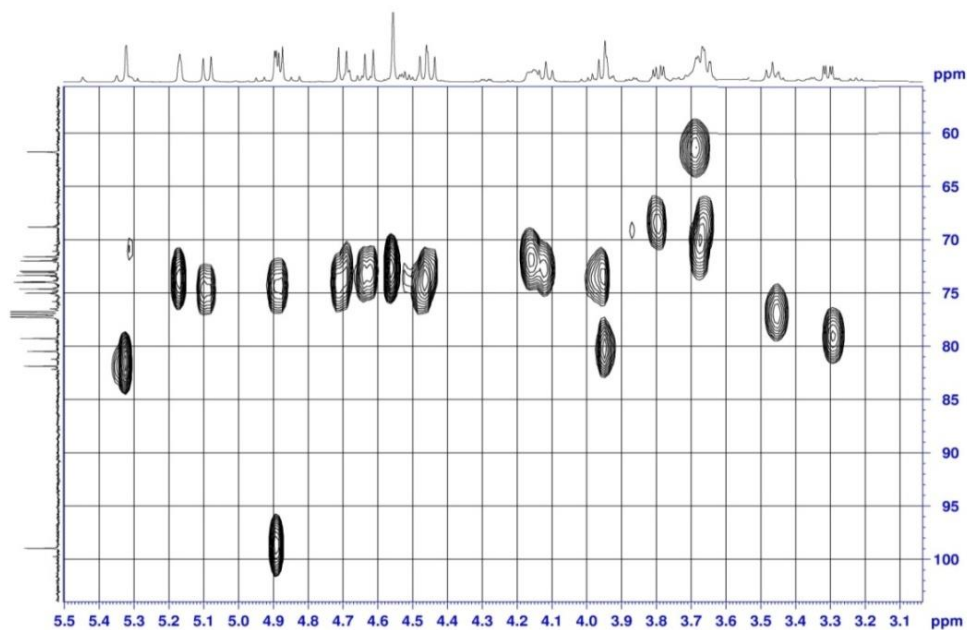

2D COSY and HSQC NMR spectra (selected regions) of ethyl (2,4-di-*O*-benzyl- $\alpha$ -D-glucopyranosyl)-(1 $\rightarrow$ 3)-2-*O*-acetyl-4,6-di-*O*-benzyl-1-thio- $\alpha$ -D-mannopyranoside (**20**)(CDCl<sub>3</sub>, 500 MHz).

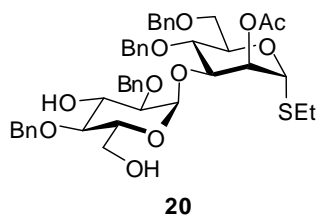

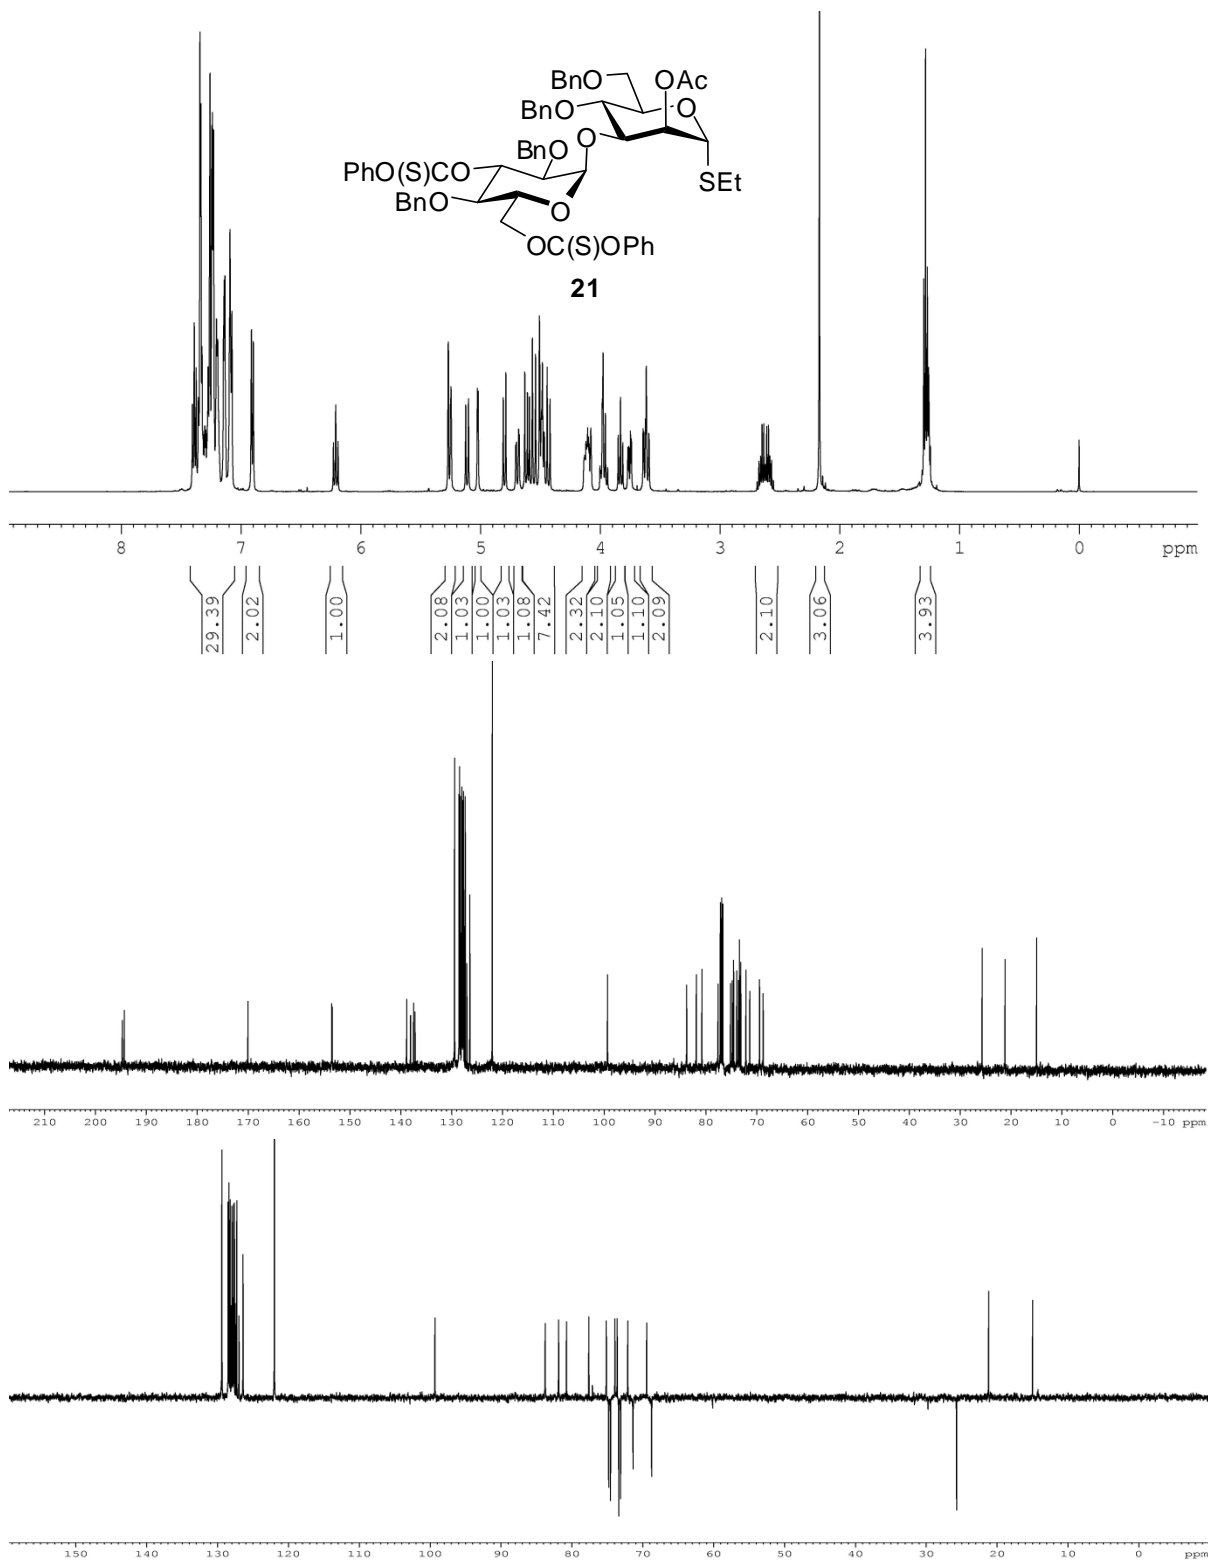

$^1\text{H}$ ,  $^{13}\text{C}$  and DEPT-135 NMR spectra of ethyl (2,4-di-*O*-benzyl-3,6-di-phenoxythiocarbonyl- $\alpha$ -D-glucopyranosyl)-(1 $\rightarrow$ 3)-2-*O*-acetyl-4,6-di-*O*-benzyl-1-thio- $\alpha$ -D-mannopyranoside (**21**) (CDCl<sub>3</sub>, 500 MHz).

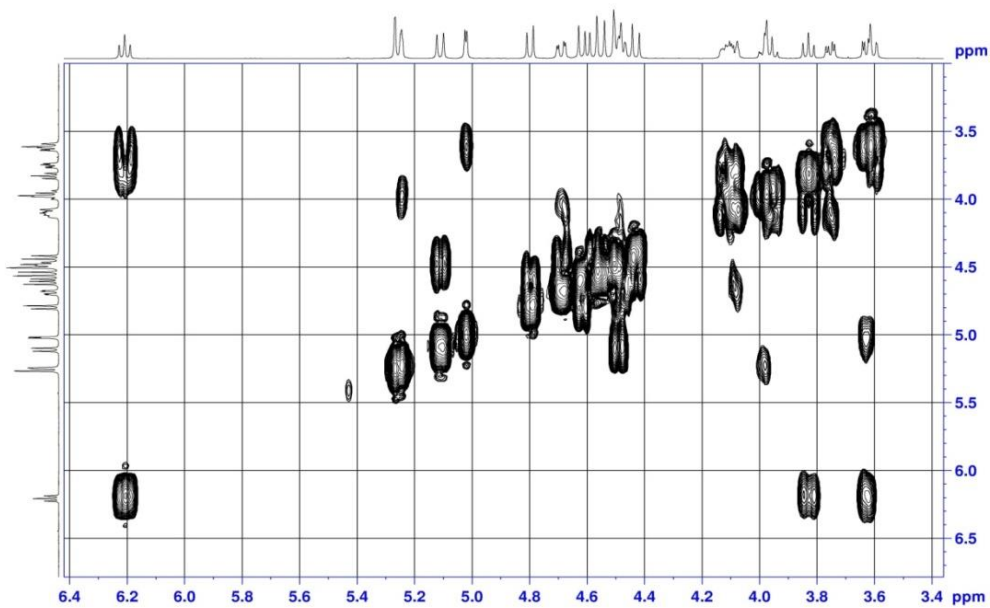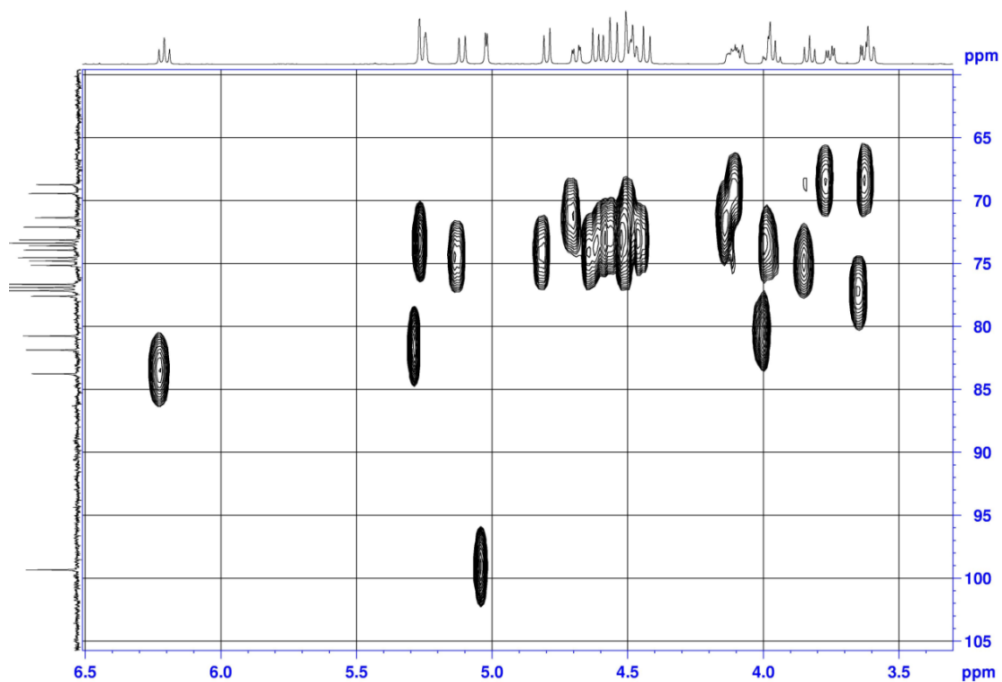

2D COSY and HSQC NMR spectra (selected regions) of ethyl (2,4-di-*O*-benzyl-3,6-di-phenoxythiocarbonyl- $\alpha$ -D-glucopyranosyl)-(1 $\rightarrow$ 3)-2-*O*-acetyl-4,6-di-*O*-benzyl-1-thio- $\alpha$ -D-mannopyranoside (**21**)(CDCl<sub>3</sub>, 500 MHz).

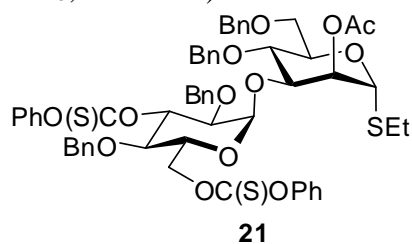

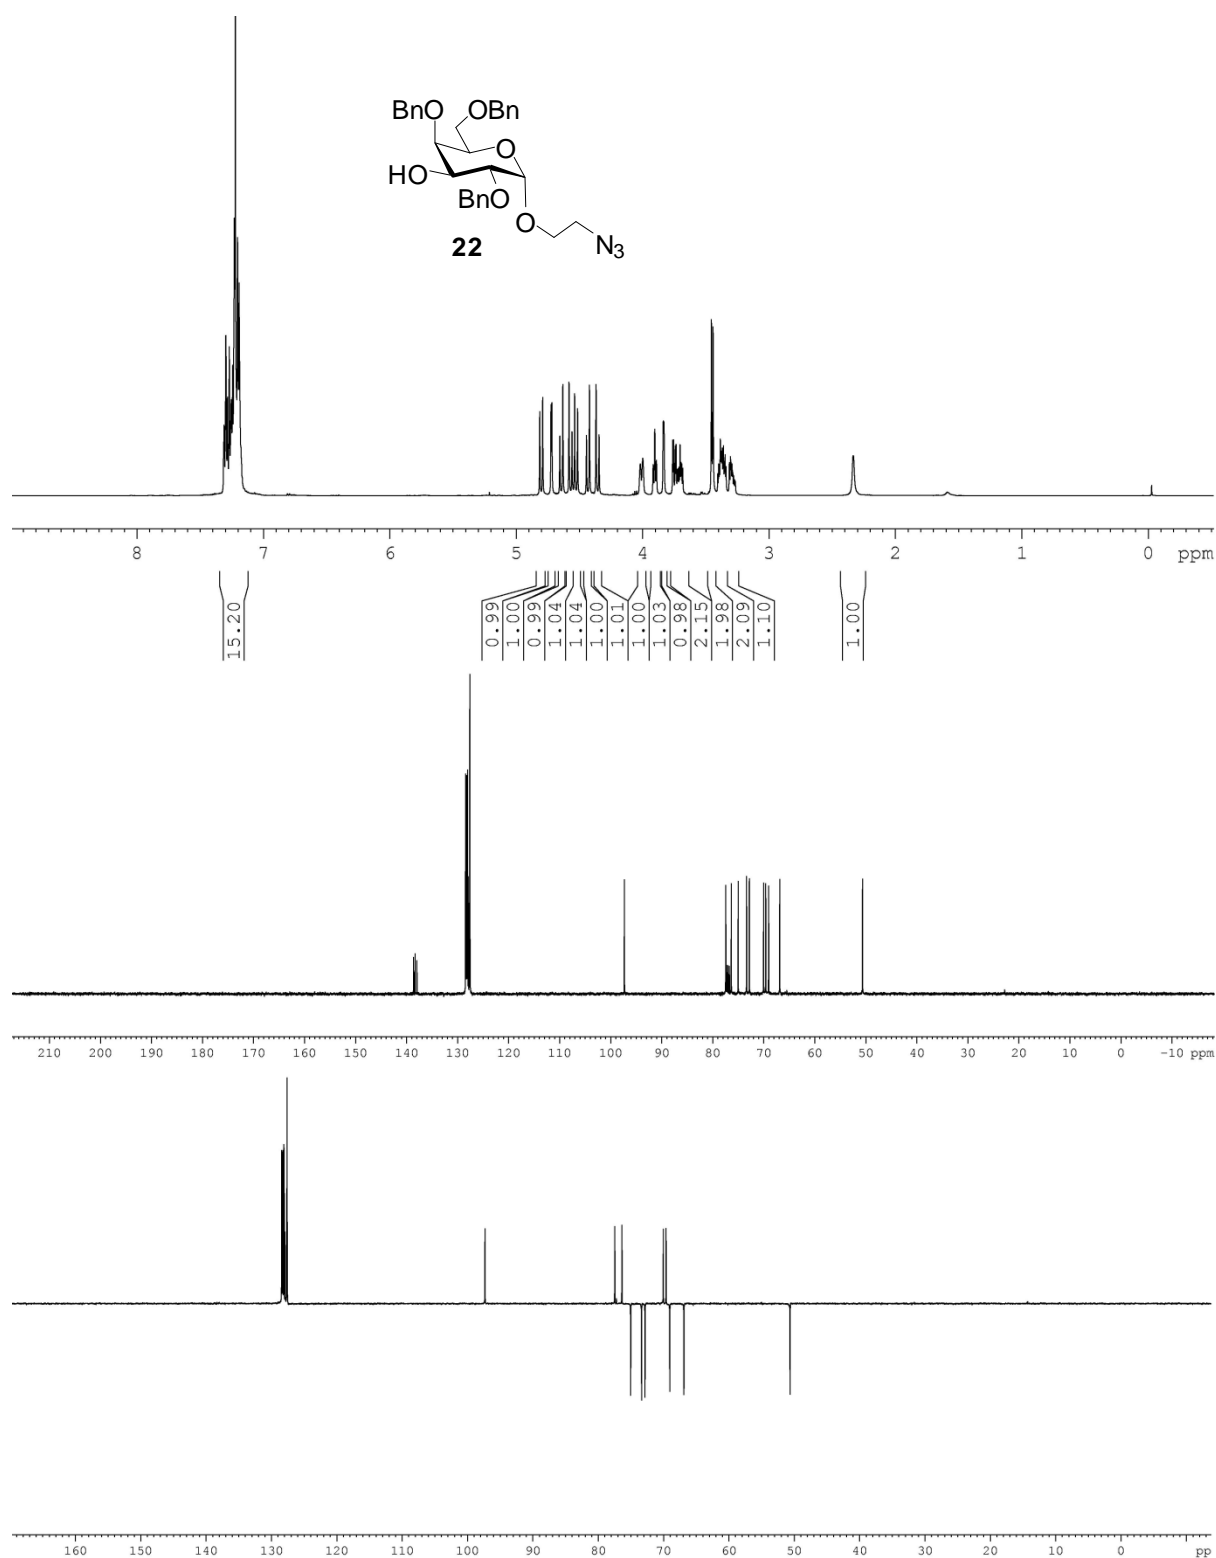

$^1\text{H}$ ,  $^{13}\text{C}$  and DEPT-135 NMR spectra of 2-azidoethyl 2,4,6-tri-*O*-benzyl- $\alpha$ -D-galactopyranoside (**22**)(CDCl<sub>3</sub>, 500 MHz).

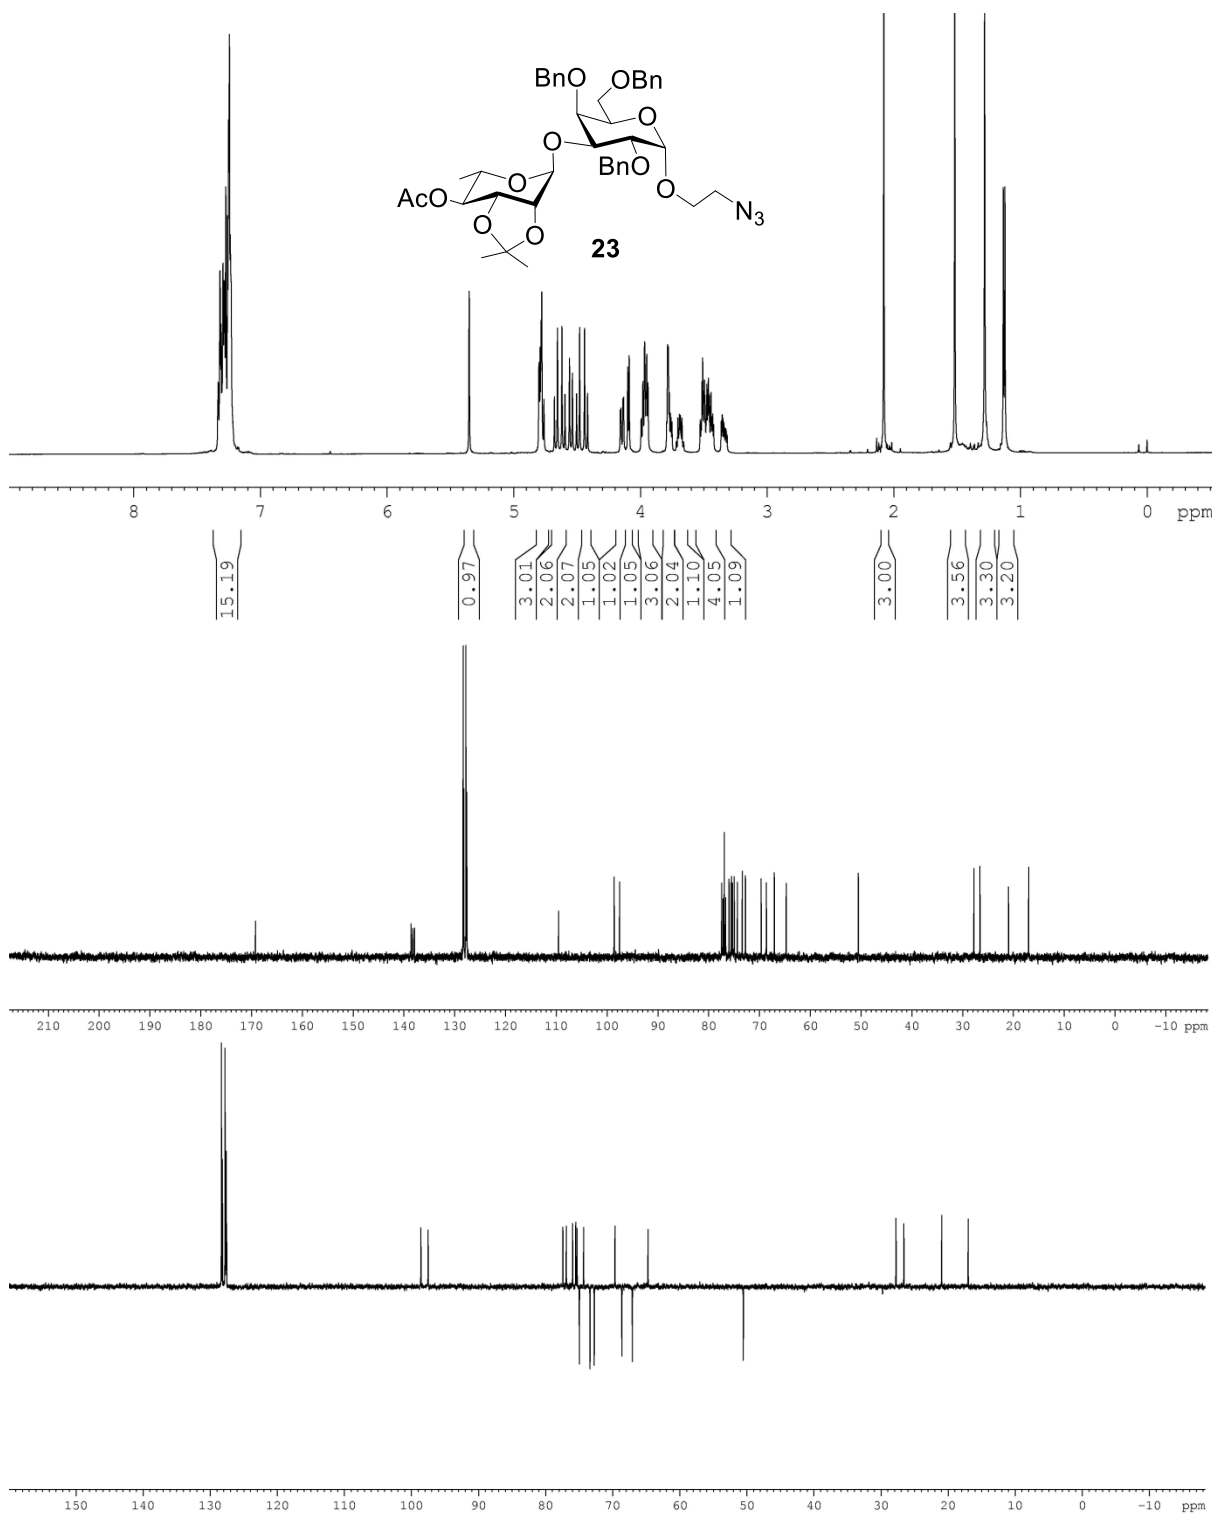

$^1\text{H}$ ,  $^{13}\text{C}$  and DEPT-135 NMR spectra of 2-azidoethyl (4-*O*-acetyl-2,3-*O*-isopropylidene- $\alpha$ -L-rhamnopyranosyl)-(1 $\rightarrow$ 3)-2,4,6-tri-*O*-benzyl- $\alpha$ -D-galactopyranoside (**23**) ( $\text{CDCl}_3$ , 500 MHz).



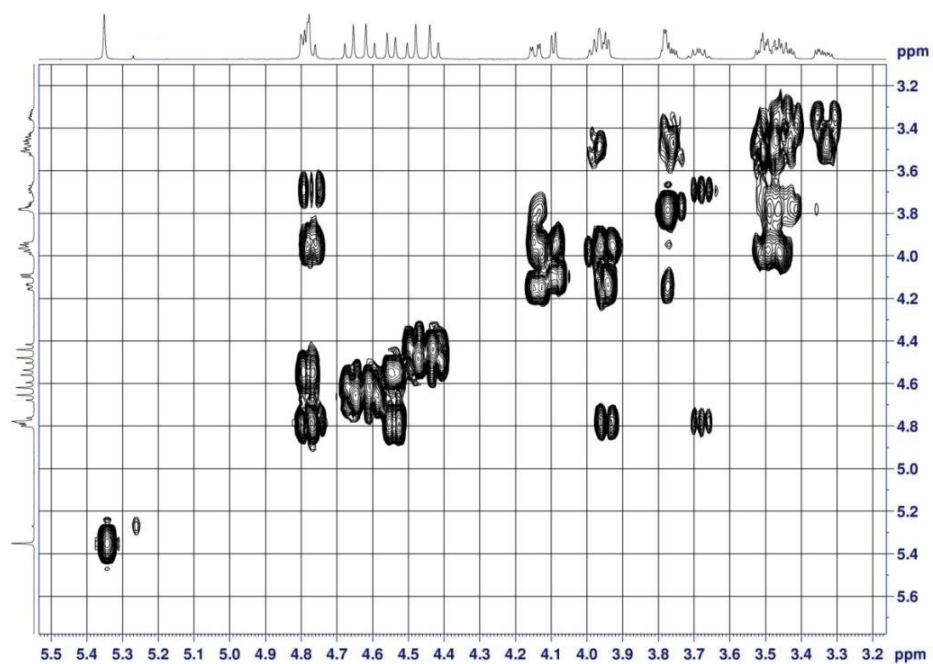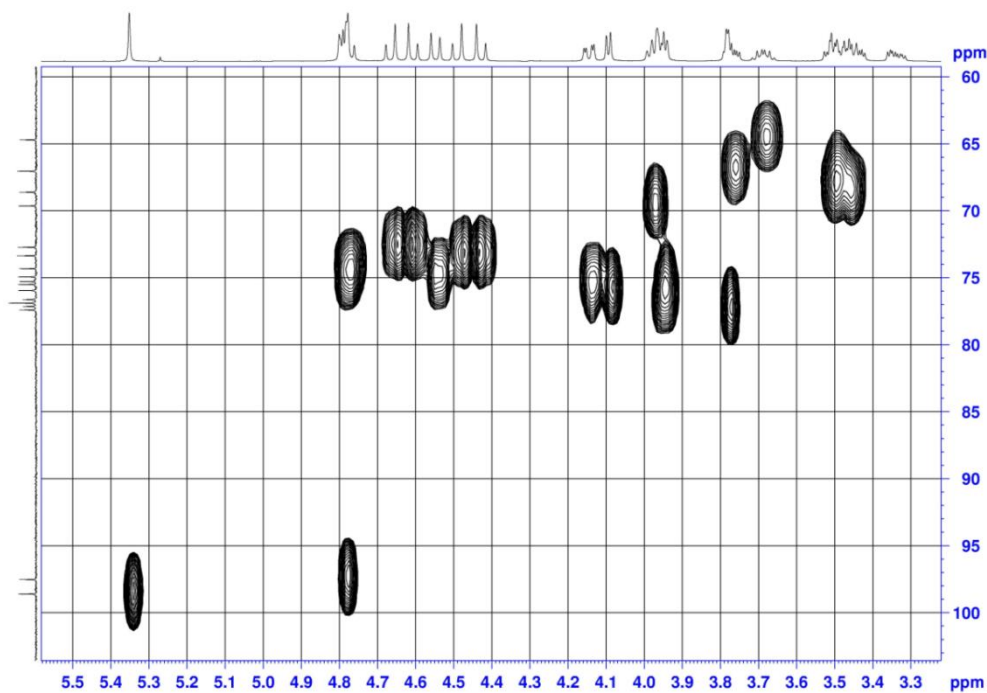

2D COSY and HSQC spectra (selected regions) of 2-azidoethyl (4-*O*-acetyl-2,3-*O*-isopropylidene- $\alpha$ -L-rhamnopyranosyl)-(1 $\rightarrow$ 3)-2,4,6-tri-*O*-benzyl- $\alpha$ -D-galactopyranoside (**23**) (CDCl<sub>3</sub>, 500 MHz).

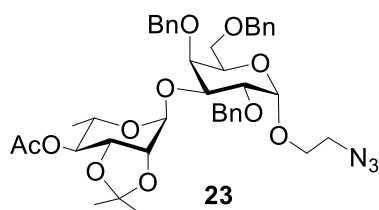

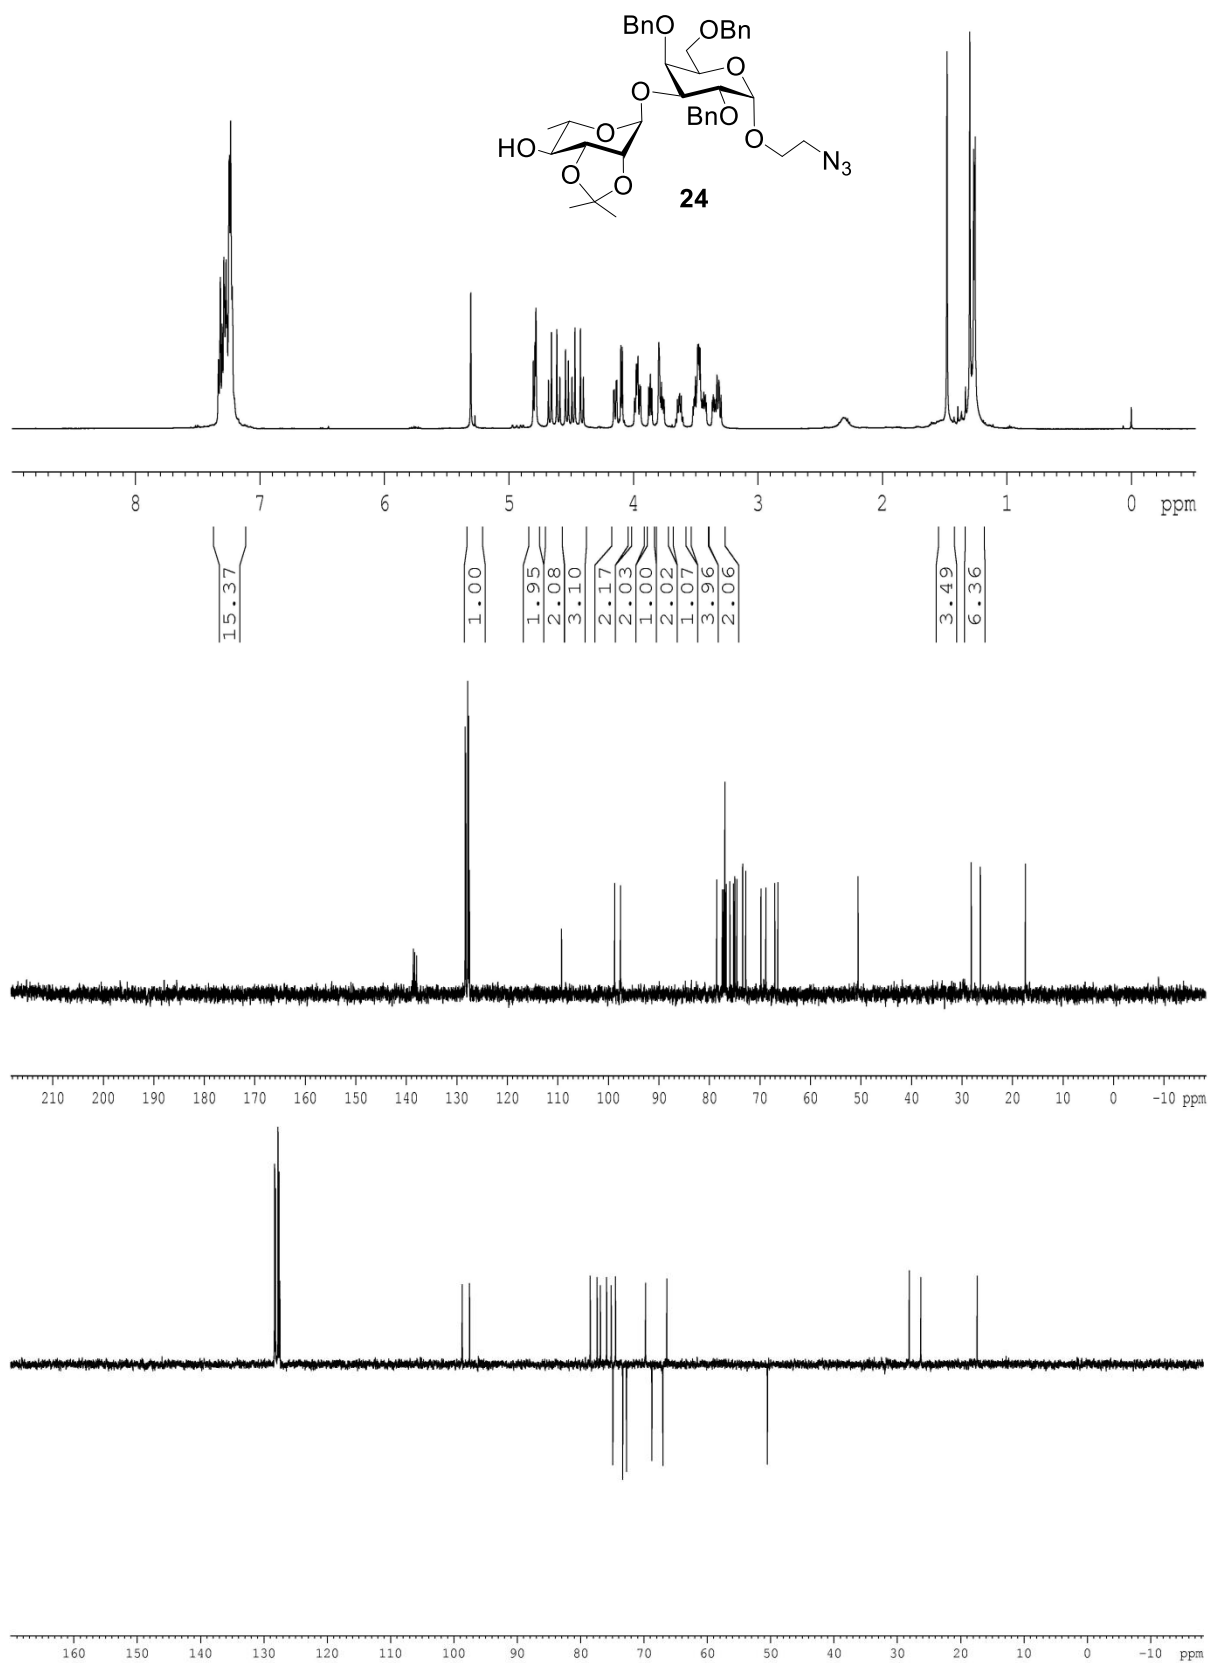

$^1\text{H}$ ,  $^{13}\text{C}$  and DEPT-135 NMR spectra of 2-azidoethyl (2,3-O-isopropylidene- $\alpha$ -L-rhamnopyranosyl)-(1 $\rightarrow$ 3)-2,4,6-tri-O-benzyl- $\alpha$ -D-galactopyranoside (**24**) ( $\text{CDCl}_3$ , 500 MHz).

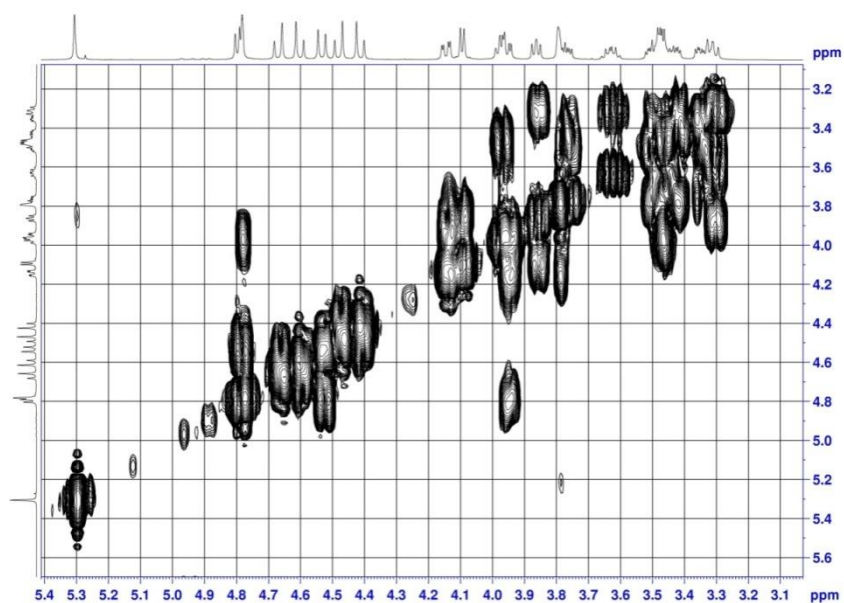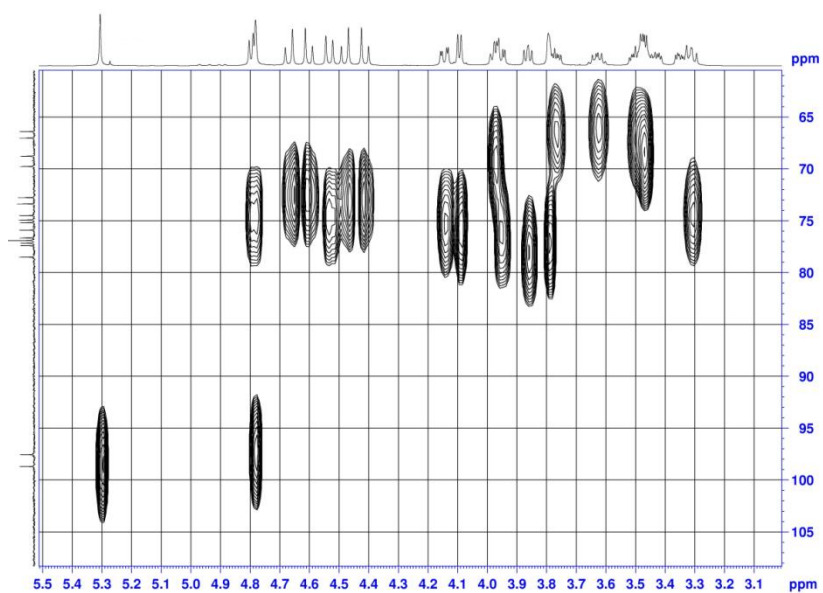

2D COSY and HSQC NMR spectra (selected regions) of 2-azidoethyl (2,3-*O*-isopropylidene- $\alpha$ -L-rhamnopyranosyl)-(1 $\rightarrow$ 3)-2,4,6-tri-*O*-benzyl- $\alpha$ -D-galactopyranoside (**24**) (CDCl<sub>3</sub>, 500 MHz).

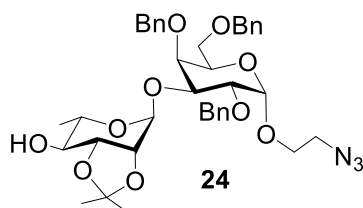

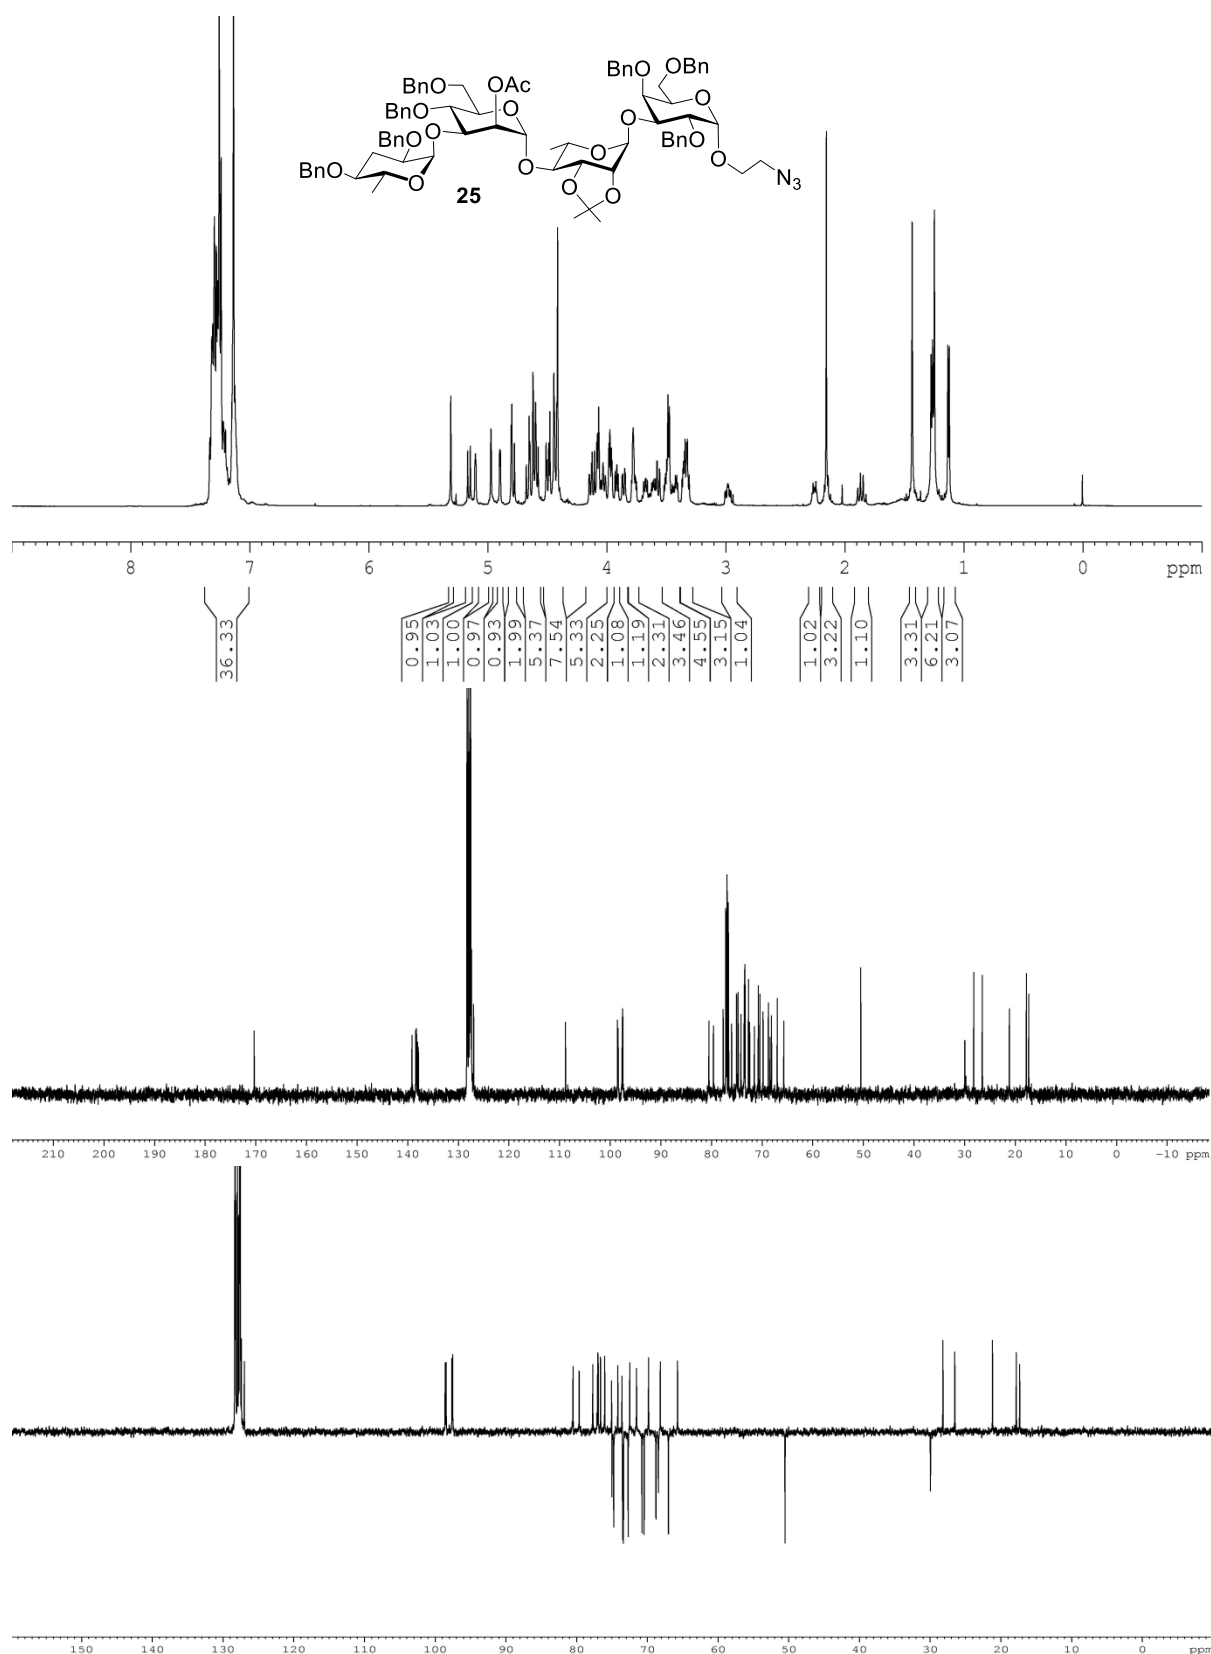

$^1\text{H}$ ,  $^{13}\text{C}$  and DEPT-135 NMR spectra of 2-azidoethyl (2,4-di-*O*-benzyl-3,6-dideoxy- $\alpha$ -D-ribohexopyranosyl)-(1 $\rightarrow$ 3)-(2-*O*-acetyl-4,6-di-*O*-benzyl- $\alpha$ -D-mannopyranosyl)-(1 $\rightarrow$ 4)-(2,3-*O*-isopropylidene- $\alpha$ -L-rhamnopyranosyl)-(1 $\rightarrow$ 3)-2,4,6-tri-*O*-benzyl- $\alpha$ -D-galactopyranoside (**25**) ( $\text{CDCl}_3$ , 500 MHz).

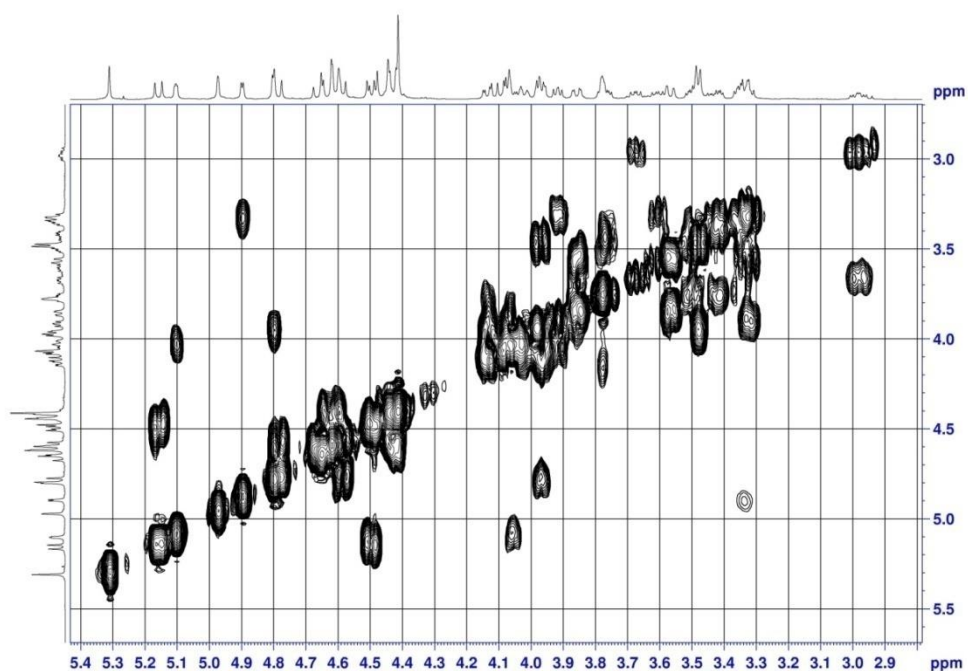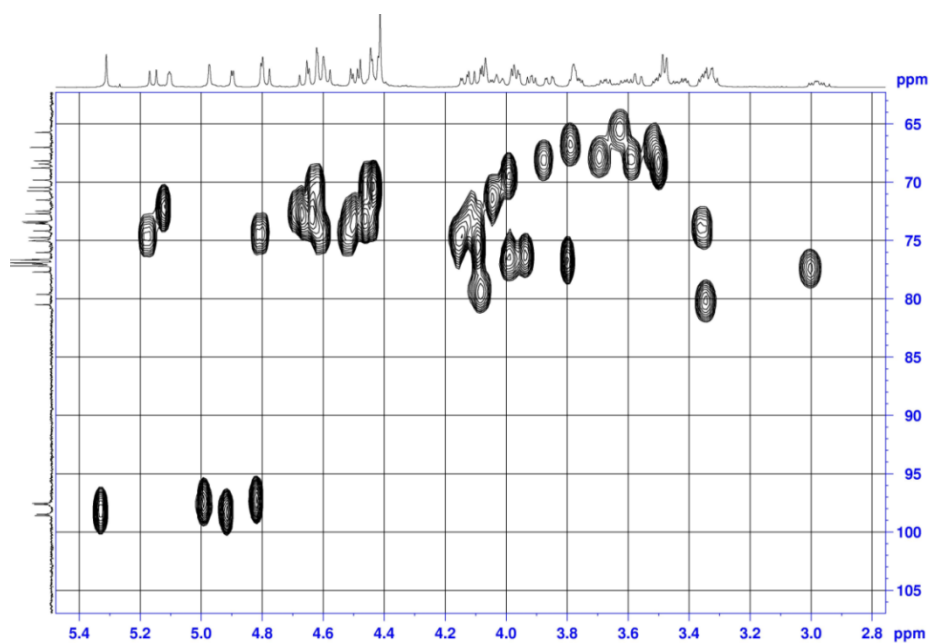

2D COSY and HSQC NMR spectra (selected regions) of 2-azidoethyl (2,4-di-*O*-benzyl-3,6-dideoxy- $\alpha$ -D-ribo-hexopyranosyl)-(1 $\rightarrow$ 3)-(2-*O*-acetyl-4,6-di-*O*-benzyl- $\alpha$ -D-mannopyranosyl)-(1 $\rightarrow$ 4)-(2,3-*O*-isopropylidene- $\alpha$ -L-rhamnopyranosyl)-(1 $\rightarrow$ 3)-2,4,6-tri-*O*-benzyl- $\alpha$ -D-galactopyranoside (**25**) (CDCl<sub>3</sub>, 500 MHz).

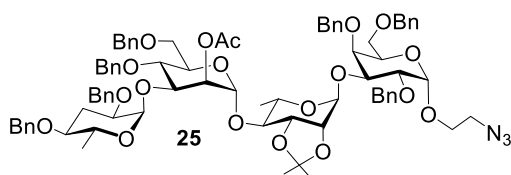

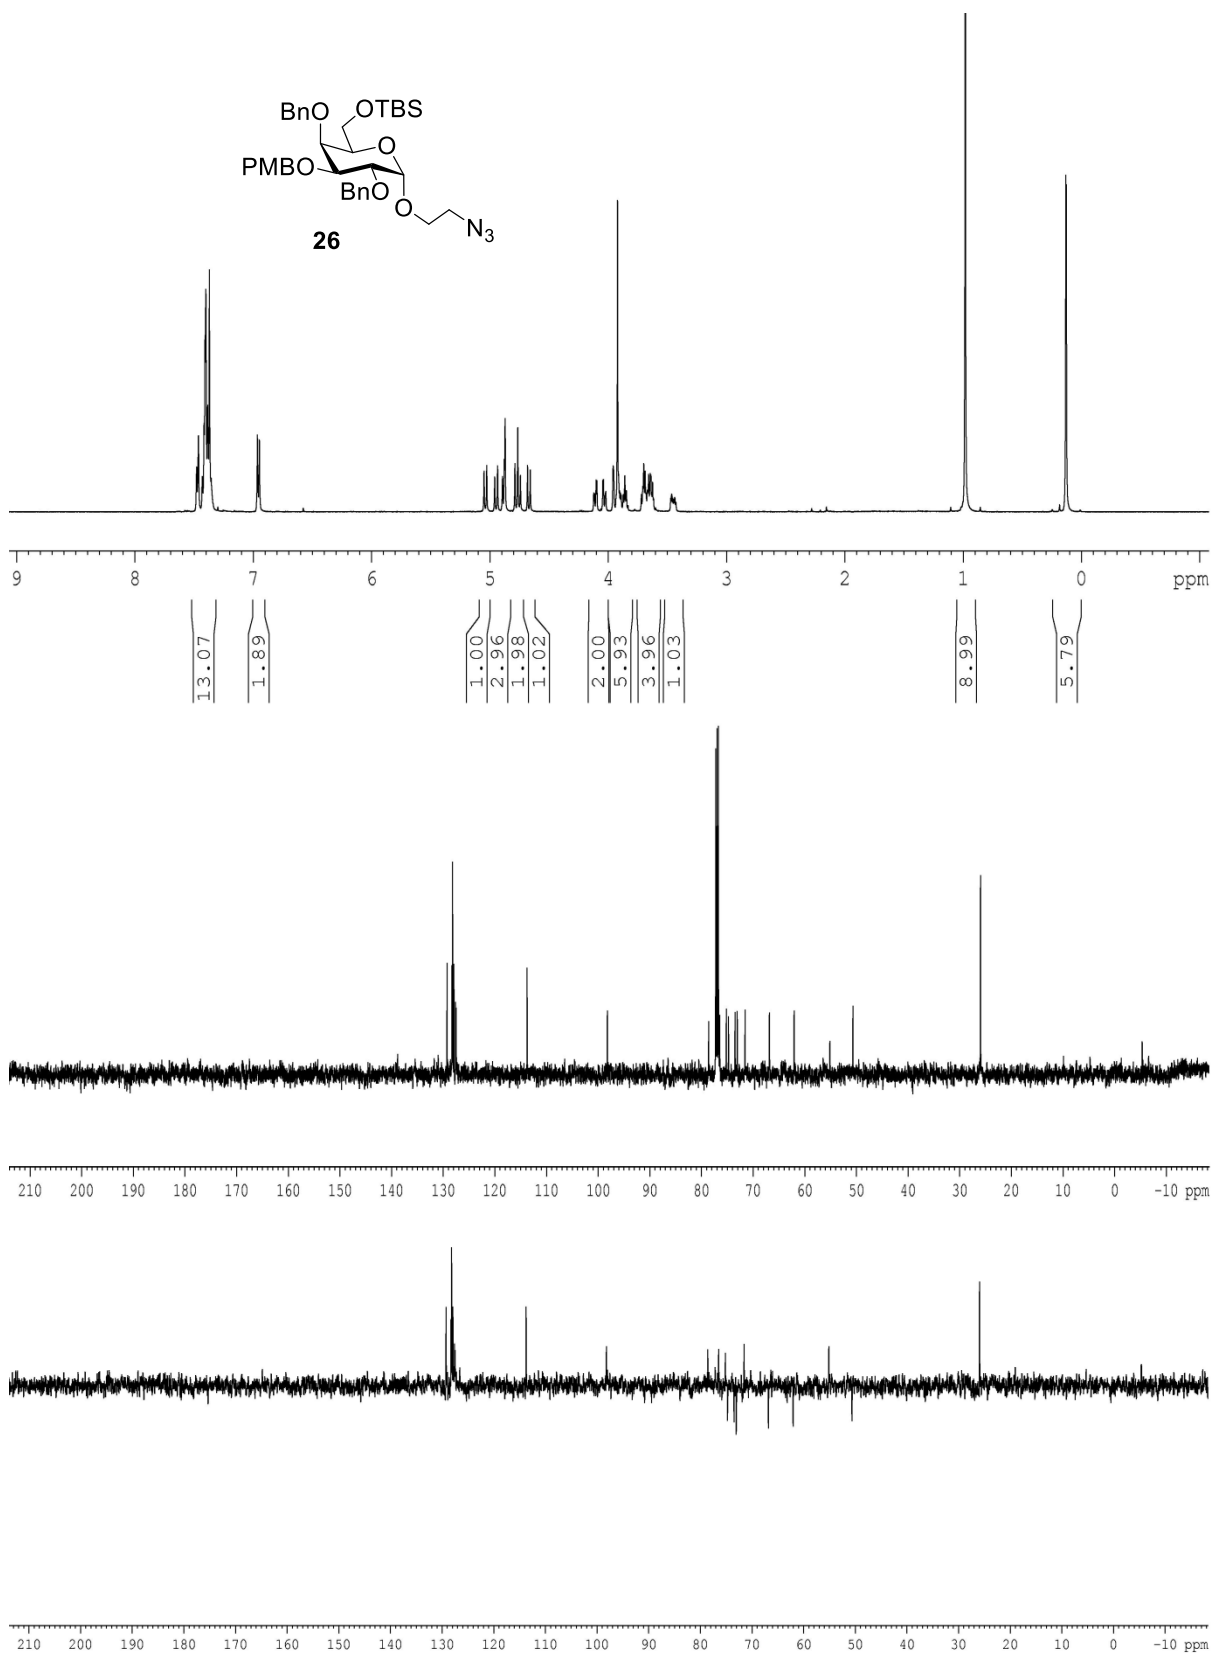

<sup>1</sup>H, <sup>13</sup>C and DEPT-135 spectra of 2-azidoethyl 2,4-di-*O*-benzyl-3-*O*-*p*-methoxybenzyl-6-*O*-(*tert*-butyldimethylsilyl)- $\alpha$ -D-galactopyranoside (**26**)(CDCl<sub>3</sub>, 500 MHz).

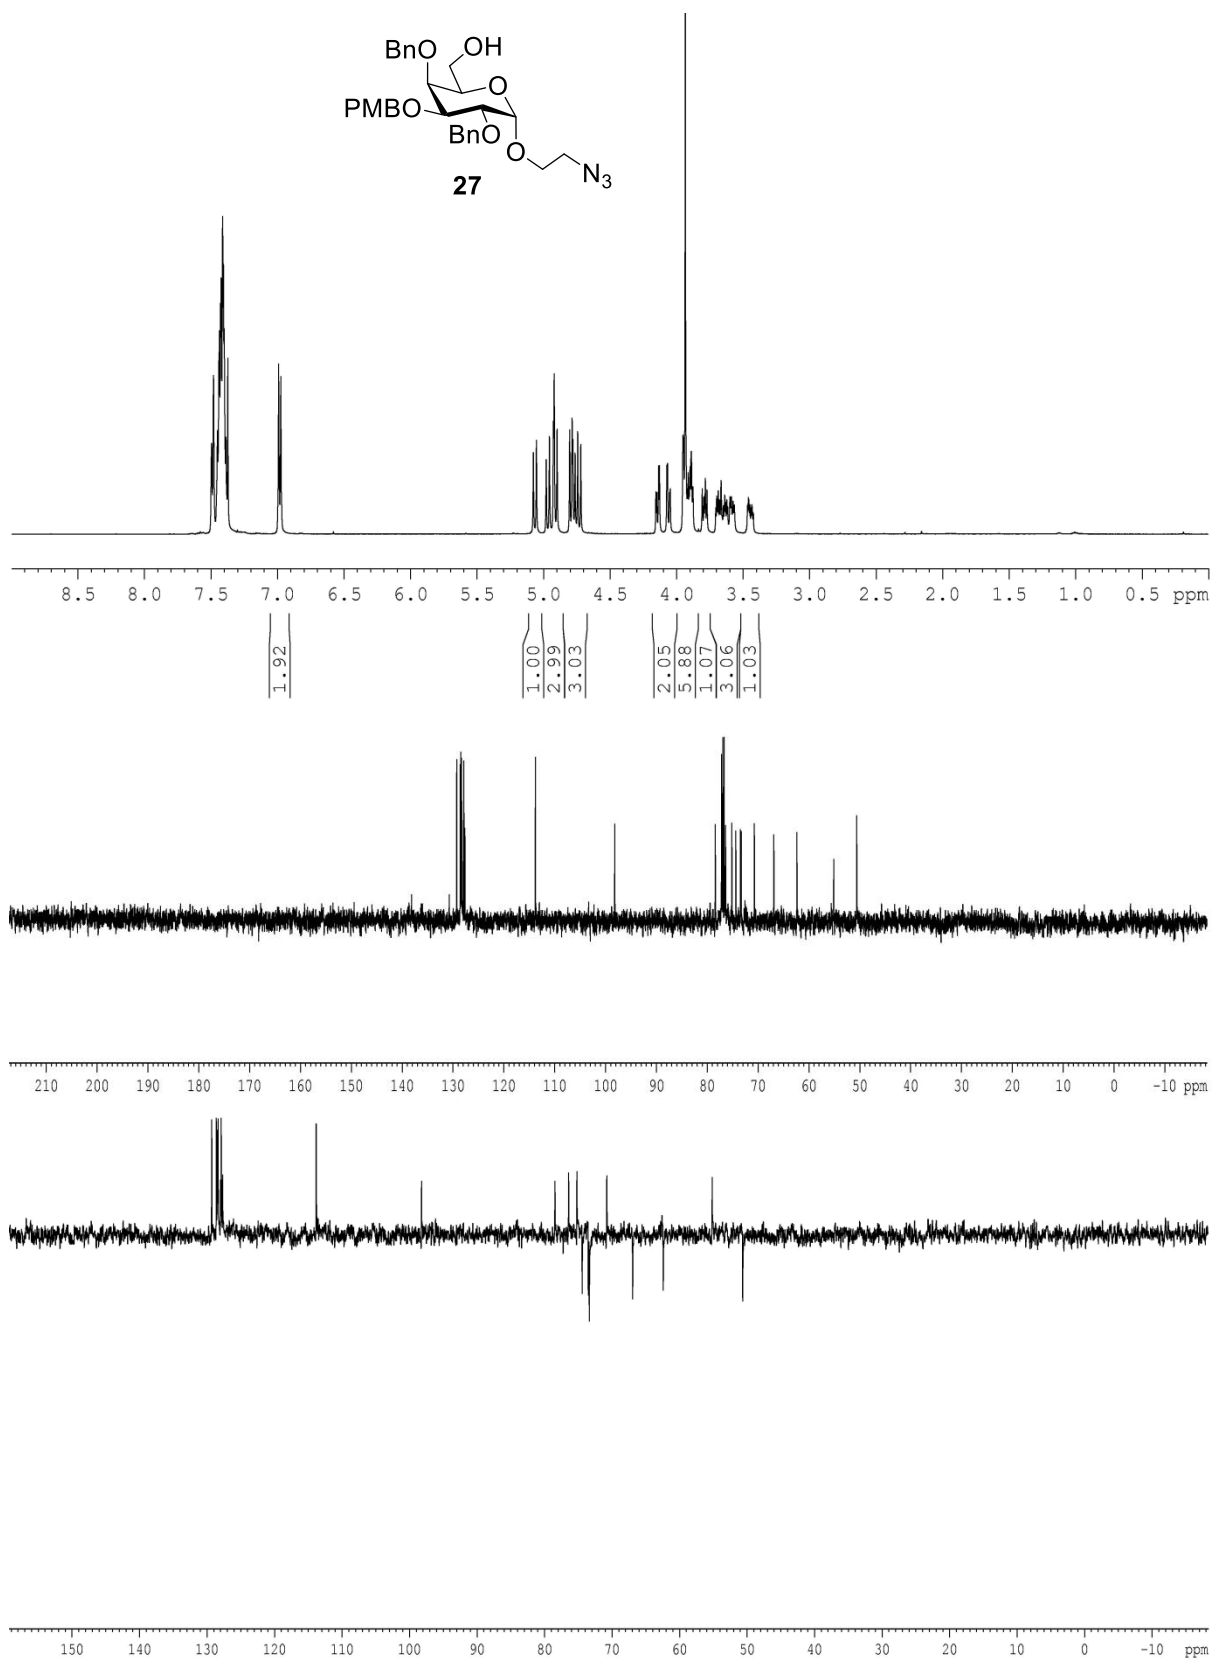

$^1\text{H}$ ,  $^{13}\text{C}$  and DEPT-135 spectra of 2-azidoethyl 2,4-di-*O*-benzyl-3-*O*-*p*-methoxybenzyl- $\alpha$ -D-galactopyranoside (**27**)( $\text{CDCl}_3$ , 500 MHz).

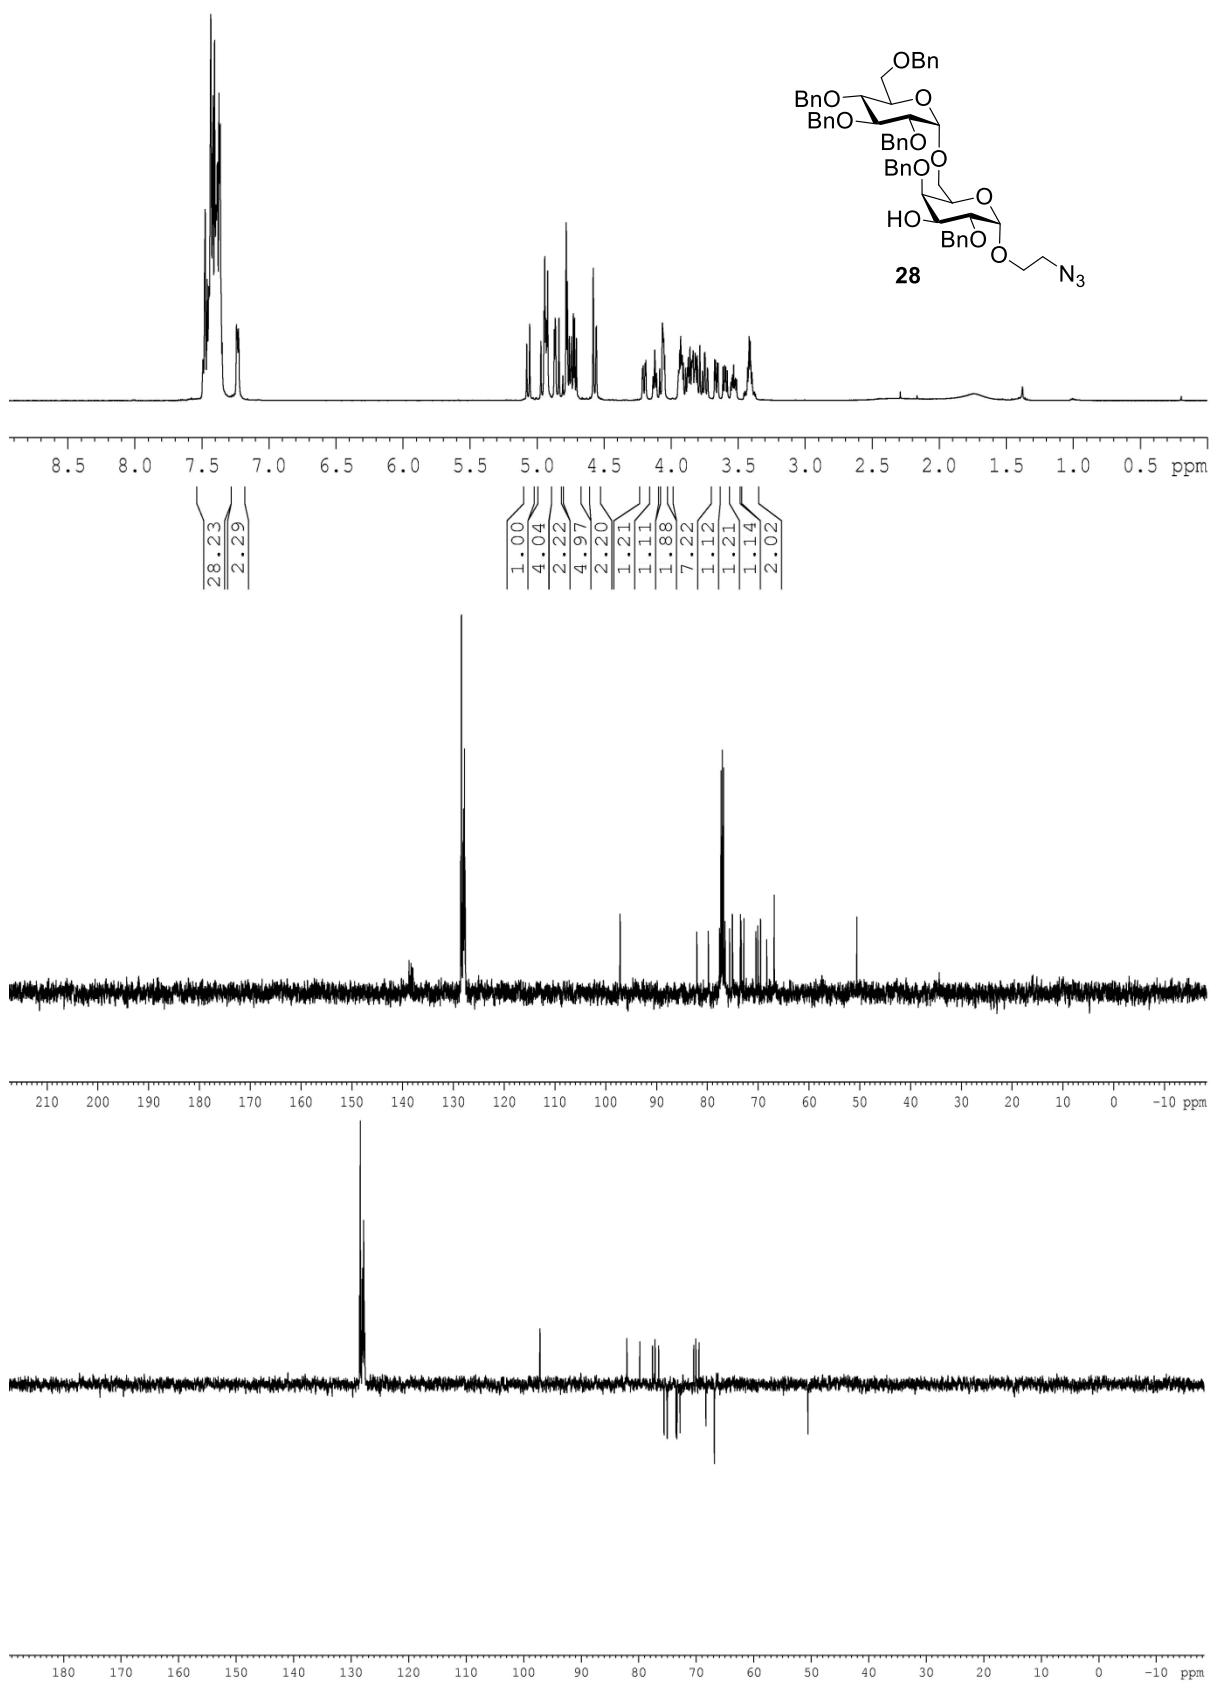

$^1\text{H}$ ,  $^{13}\text{C}$  and DEPT-135 spectra of 2-azidoethyl (2,3,4,6-tetra-*O*-benzyl- $\alpha$ -D-glucopyranosyl)-(1 $\rightarrow$ 6)-2,4-di-*O*-benzyl- $\alpha$ -D-galactopyranoside (**28**)( $\text{CDCl}_3$ , 500 MHz).



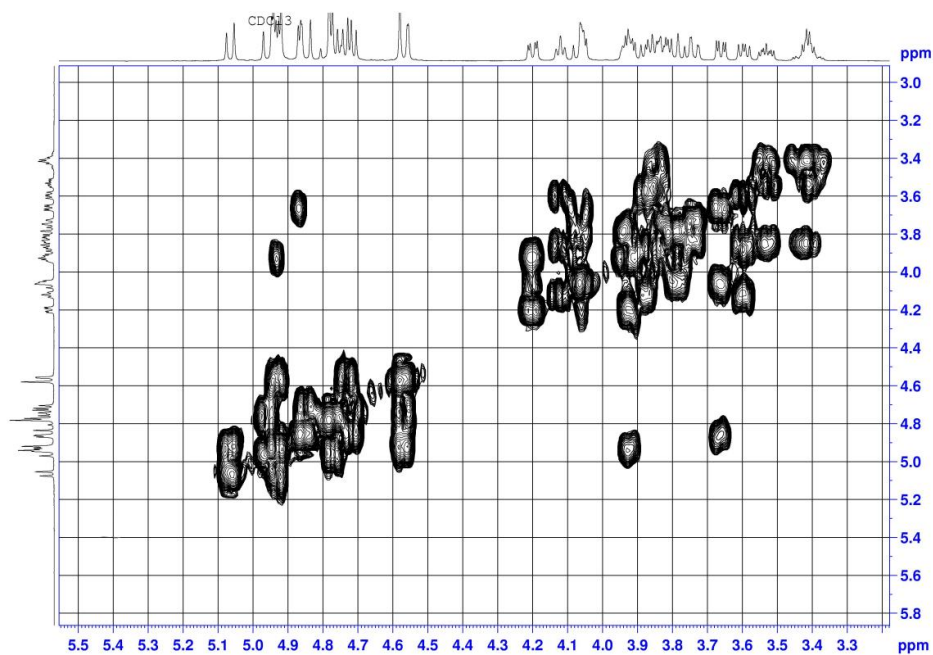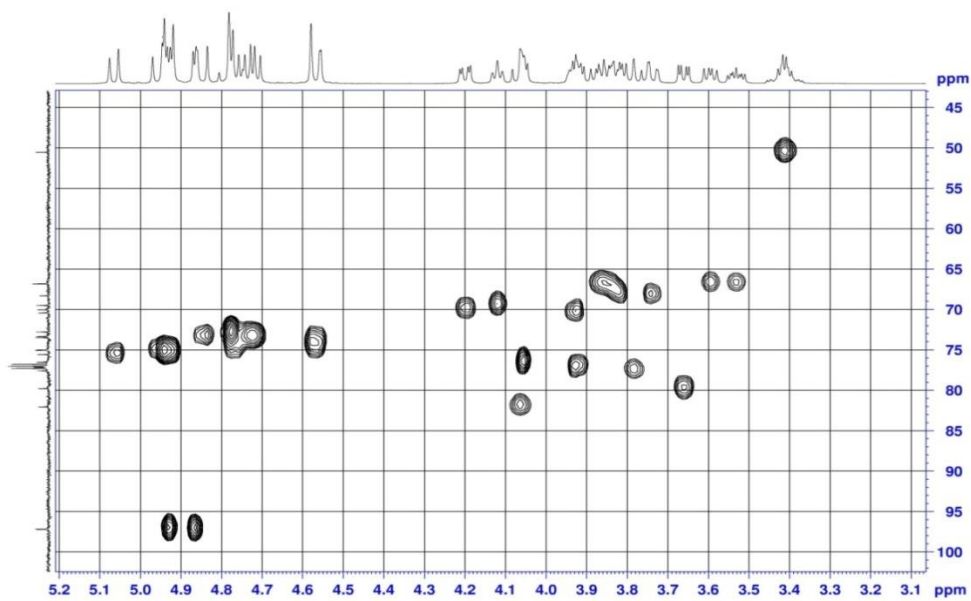

2D COSY and HSQC NMR spectra (selected regions) of 2-azidoethyl (2,3,4,6-tetra-*O*-benzyl- $\alpha$ -D-glucopyranosyl)-(1 $\rightarrow$ 6)-2,4-di-*O*-benzyl- $\alpha$ -D-galactopyranoside (**28**)(CDCl<sub>3</sub>, 500 MHz).

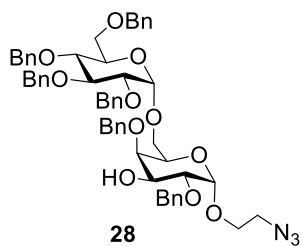

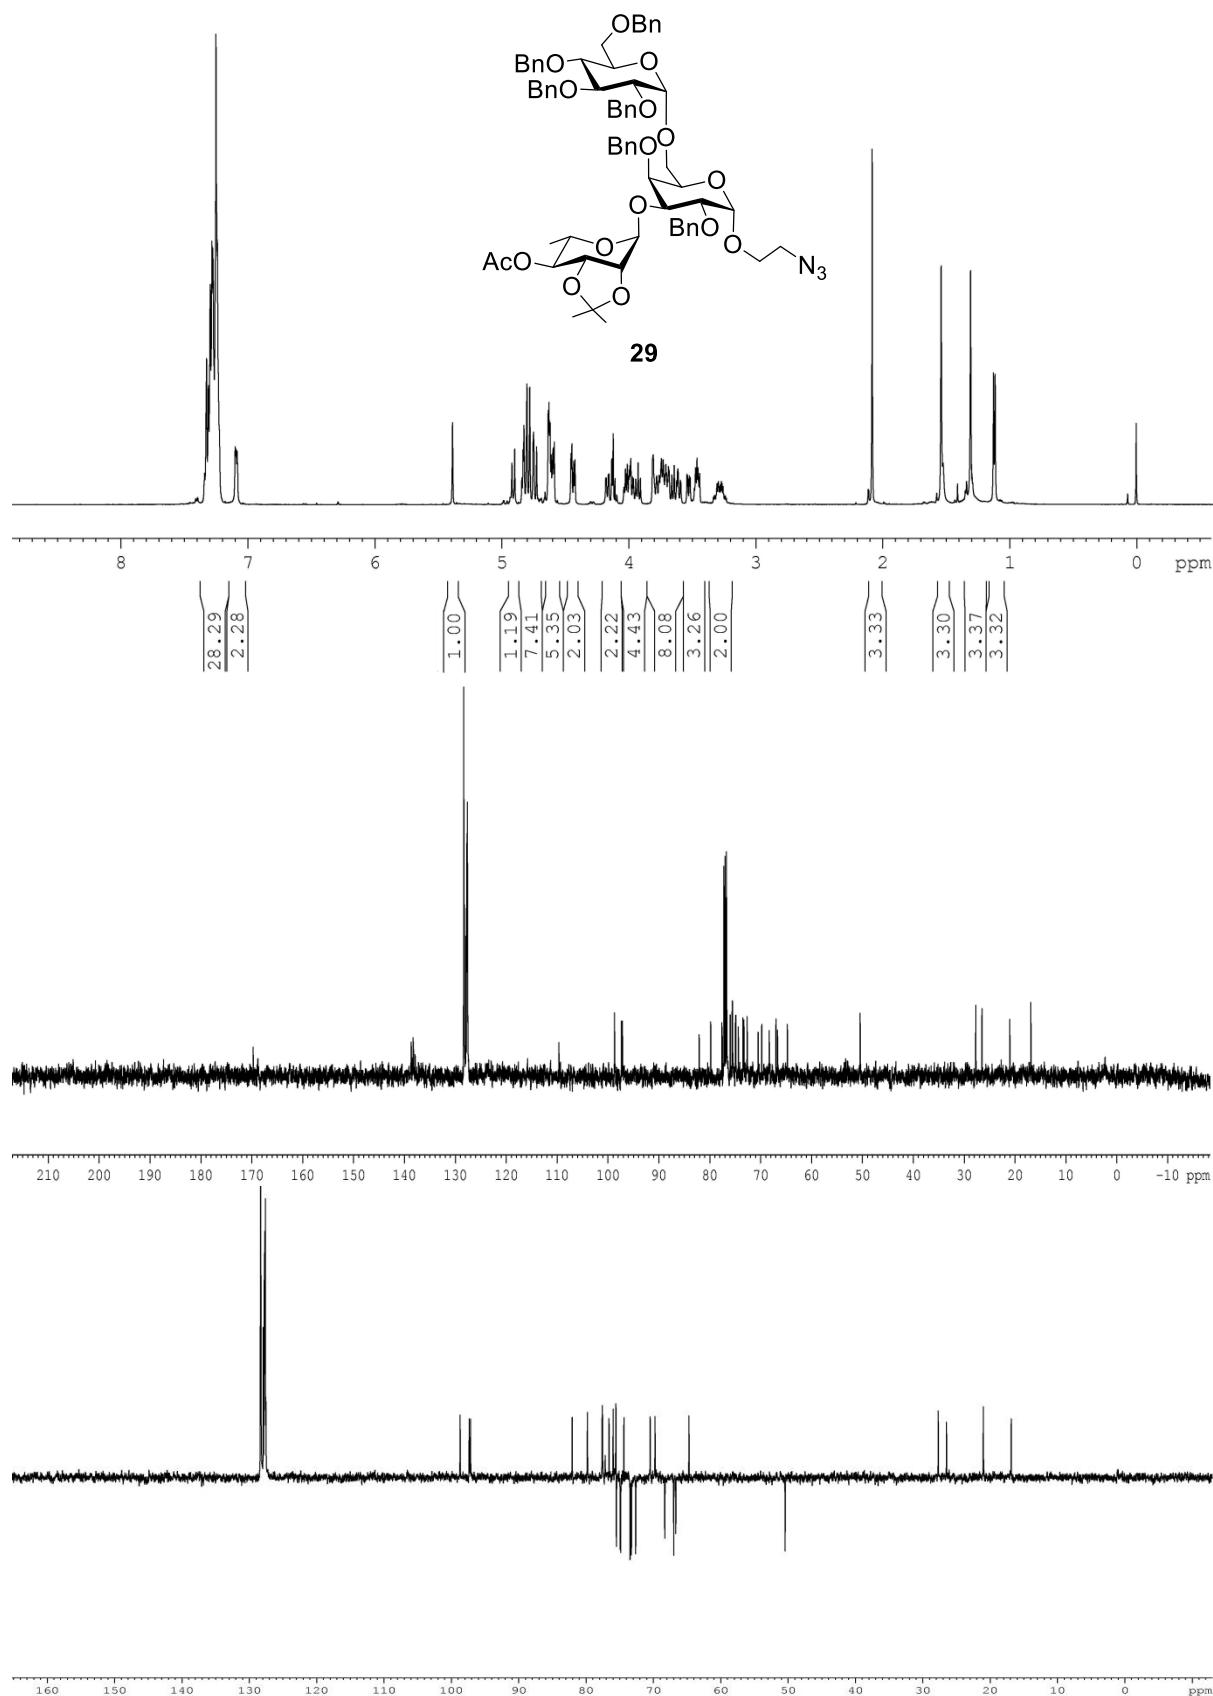

<sup>1</sup>H, <sup>13</sup>C and DEPT-135 NMR spectra of 2-azidoethyl (4-*O*-acetyl-2,3-*O*-isopropylidene- $\alpha$ -L-rhamnopyranosyl)-(1 $\rightarrow$ 3)-[(2,3,4,6-tetra-*O*-benzyl- $\alpha$ -D-glucopyranosyl)-(1 $\rightarrow$ 6)]-2,4-di-*O*-benzyl- $\alpha$ -D-galactopyranoside (**29**) (CDCl<sub>3</sub>, 500 MHz).

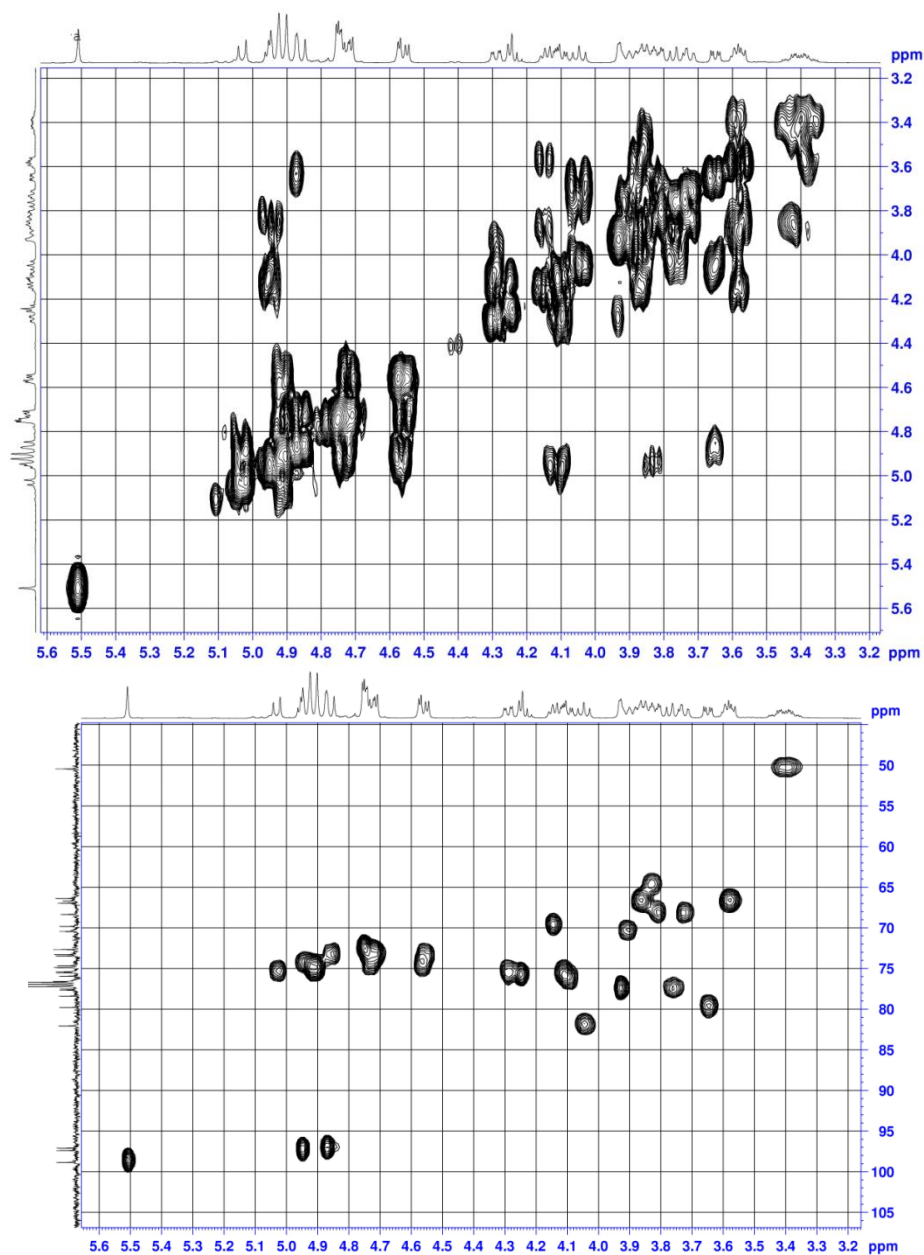

2D COSY and HSQC NMR spectra (selected regions) of 2-azidoethyl (4-*O*-acetyl-2,3-*O*-isopropylidene- $\alpha$ -L-rhamnopyranosyl)-(1 $\rightarrow$ 3)-[(2,3,4,6-tetra-*O*-benzyl- $\alpha$ -D-glucopyranosyl)-(1 $\rightarrow$ 6)]-2,4-di-*O*-benzyl- $\alpha$ -D-galactopyranoside (**29**) (CDCl<sub>3</sub>, 500 MHz).

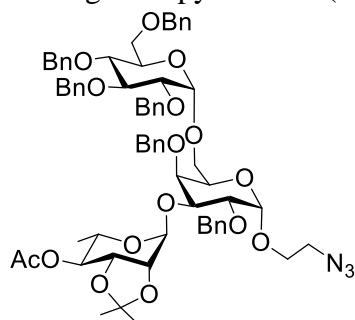

**29**

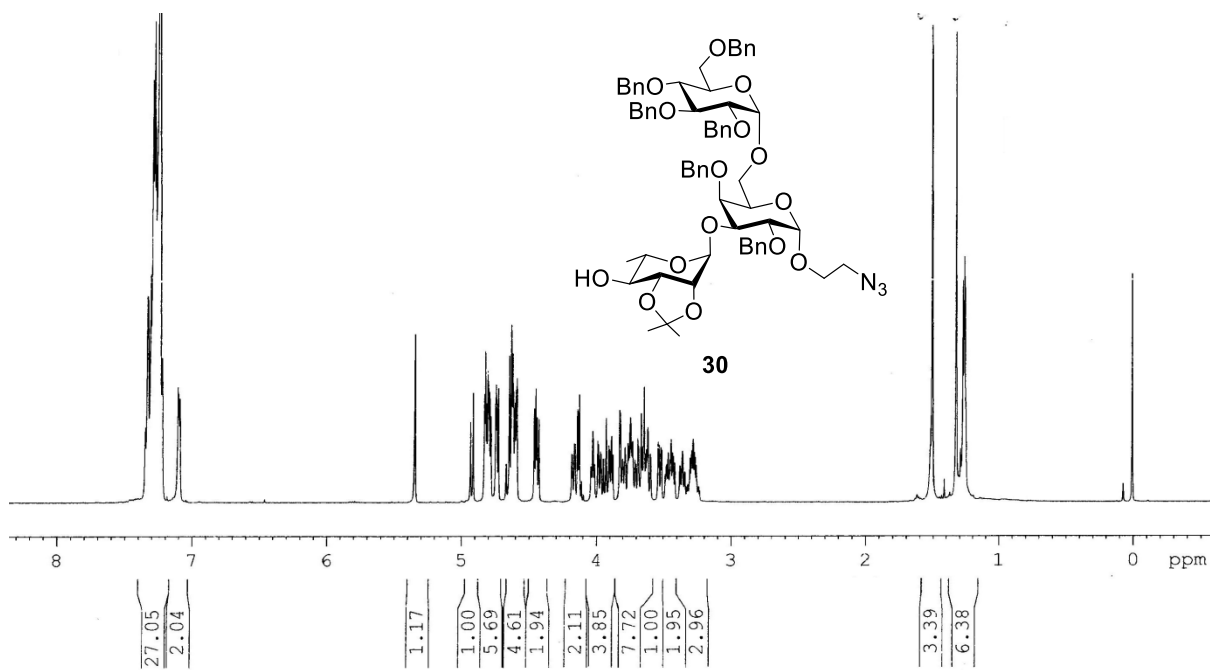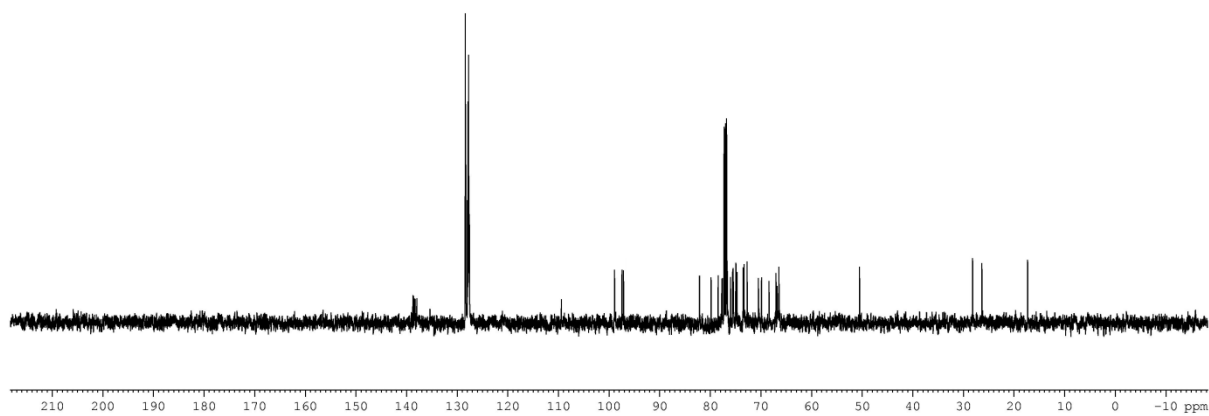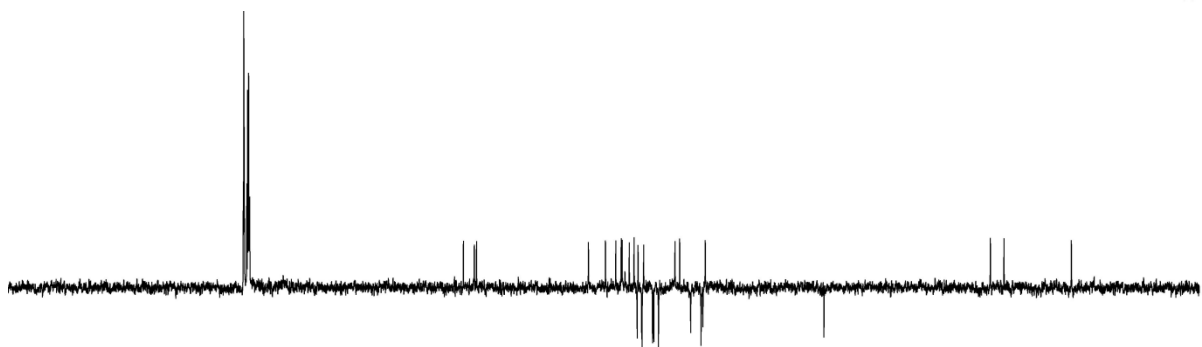

$^1\text{H}$ ,  $^{13}\text{C}$  and DEPT-135 NMR spectra of 2-azidoethyl (2,3-O-isopropylidene- $\alpha$ -L-rhamnopyranosyl)-(1 $\rightarrow$ 3)-[(2,3,4,6-tetra-O-benzyl- $\alpha$ -D-glucopyranosyl)-(1 $\rightarrow$ 6)]-2,4-di-O-benzyl- $\alpha$ -D-galactopyranoside (**30**)(CDCl<sub>3</sub>, 500 MHz).

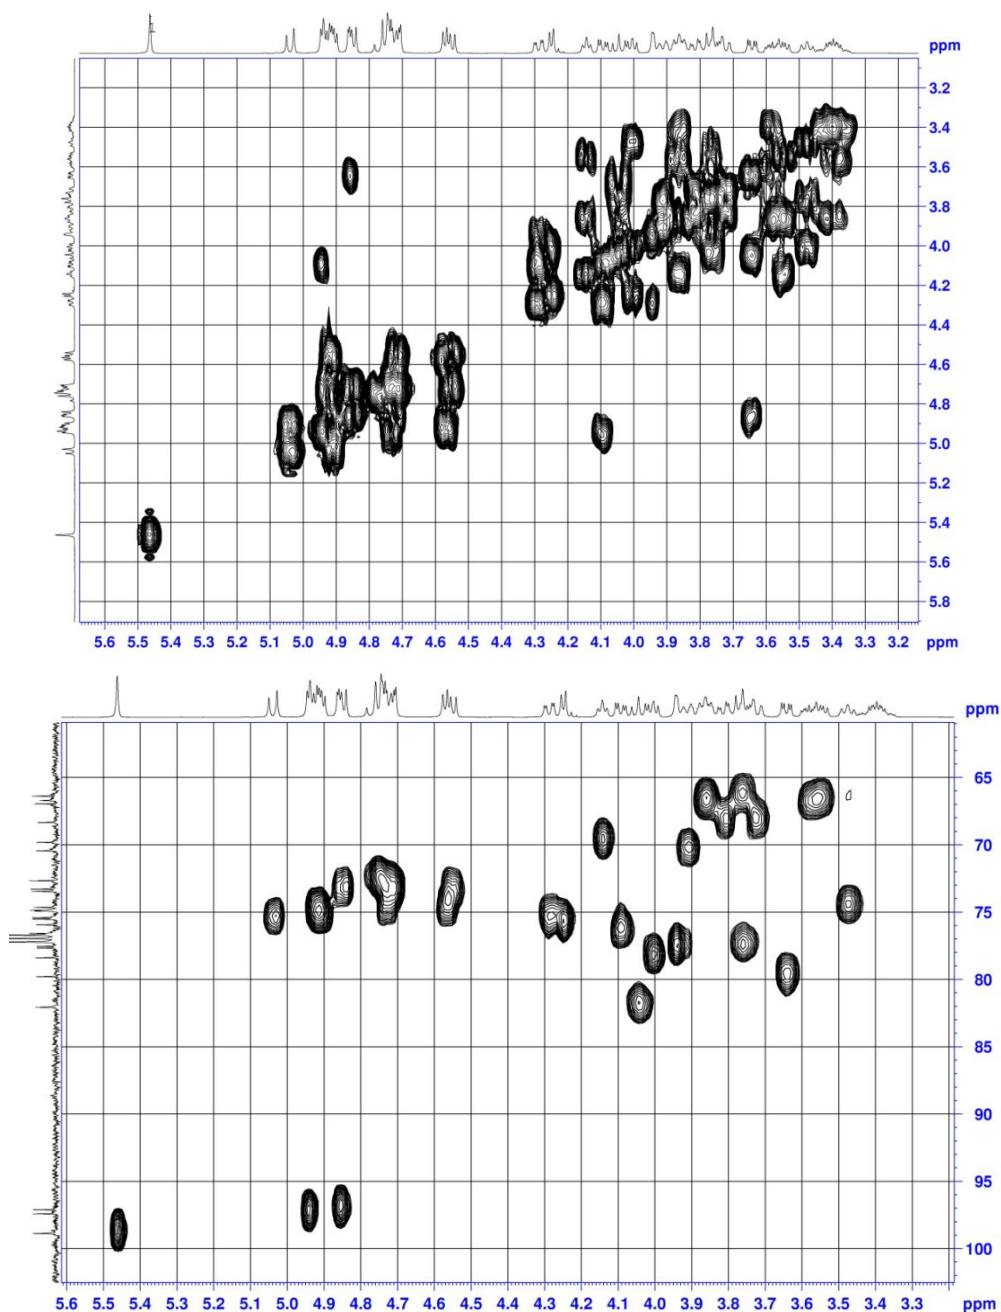

2D COSY and HSQC NMR spectra (selected regions) of 2-azidoethyl (2,3-*O*-isopropylidene- $\alpha$ -L-rhamnopyranosyl)-(1 $\rightarrow$ 3)-[(2,3,4,6-tetra-*O*-benzyl- $\alpha$ -D-glucopyranosyl)-(1 $\rightarrow$ 6)]-2,4-di-*O*-benzyl- $\alpha$ -D-galactopyranoside (**30**)(CDCl<sub>3</sub>, 500 MHz).

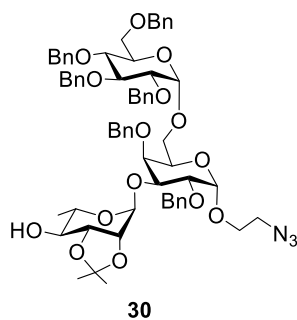

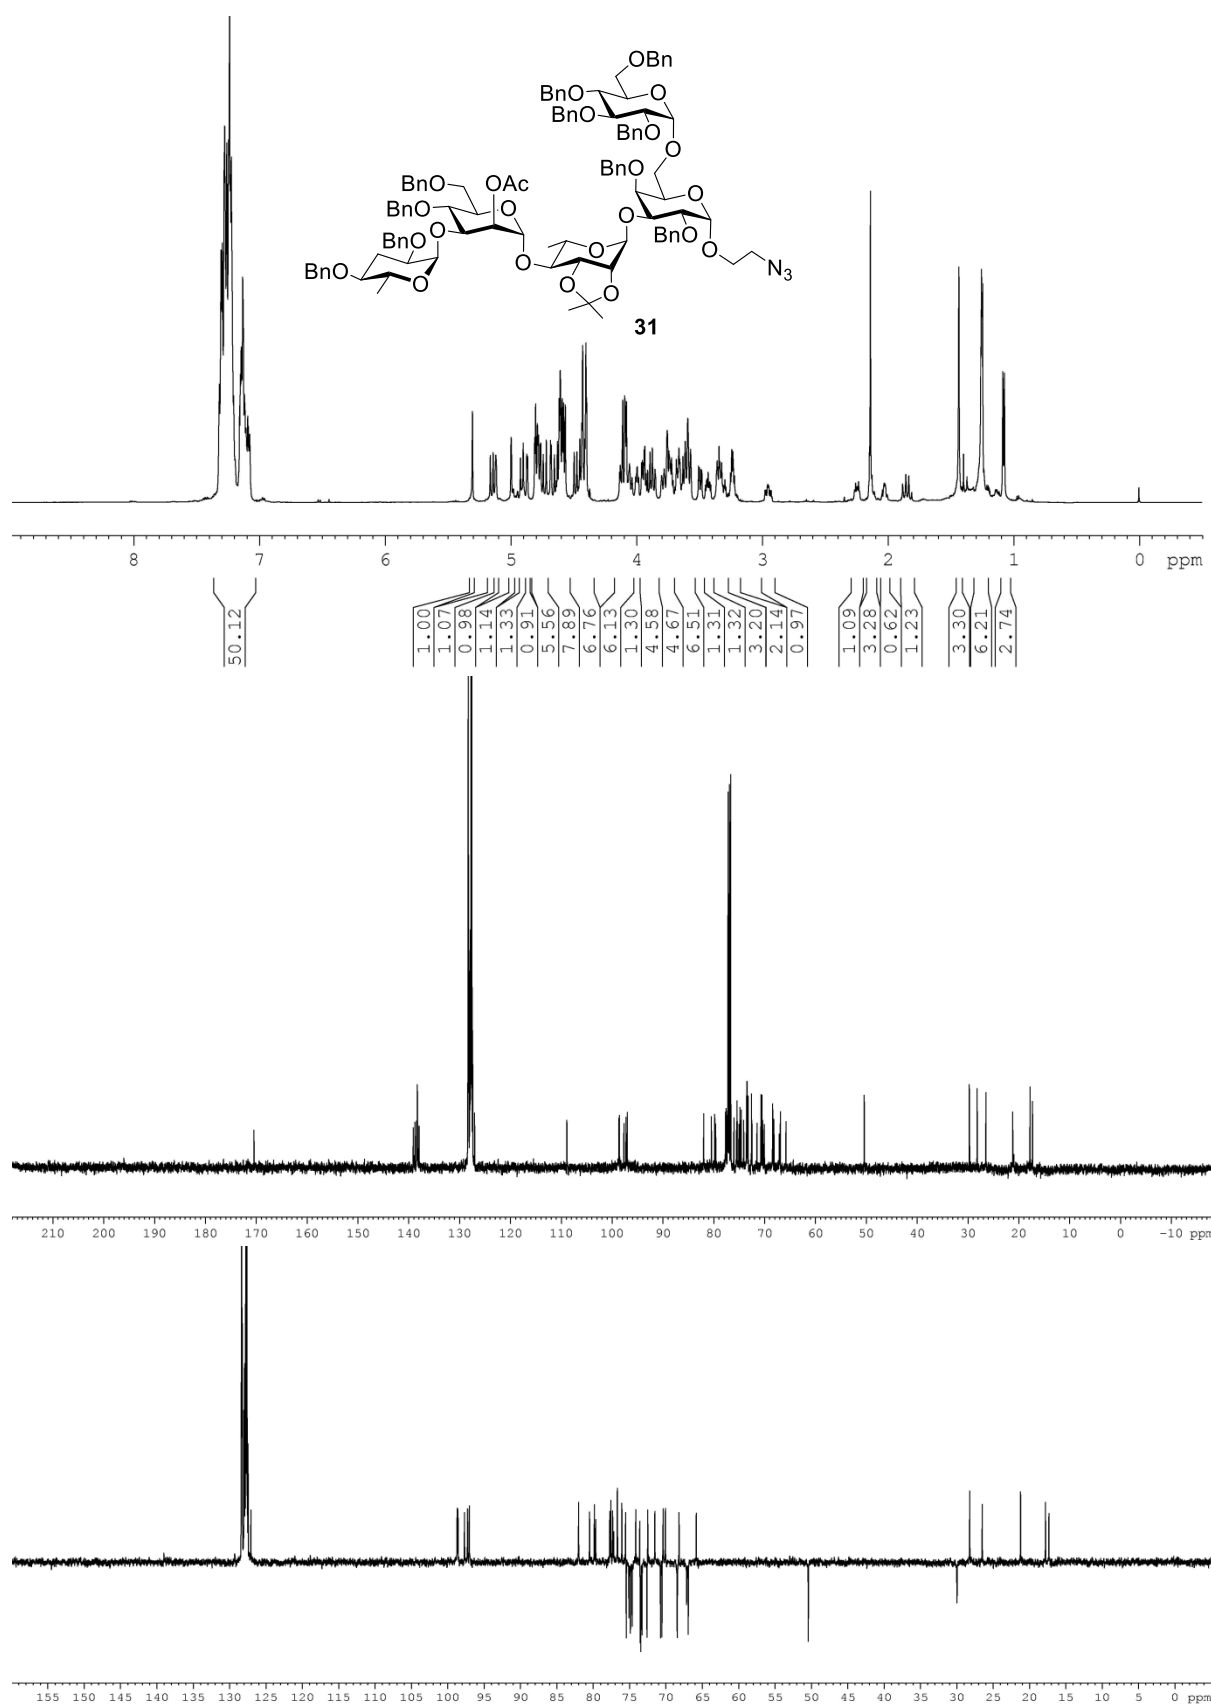

$^1\text{H}$ ,  $^{13}\text{C}$  and DEPT-135 NMR spectra of 2-azidoethyl (2,4-di-*O*-benzyl-3,6-dideoxy- $\alpha$ -D-ribohexopyranosyl)-(1 $\rightarrow$ 3)-(2-*O*-acetyl-4,6-di-*O*-benzyl- $\alpha$ -D-mannopyranosyl)-(1 $\rightarrow$ 4)-(2,3-*O*-isopropylidene- $\alpha$ -L-rhamnopyranosyl)-(1 $\rightarrow$ 3)-[(2,3,4,6-tetra-*O*-benzyl- $\alpha$ -D-glucopyranosyl)-(1 $\rightarrow$ 6)]-2,4-di-*O*-benzyl- $\alpha$ -D-galactopyranoside (**31**) ( $\text{CDCl}_3$ , 500 MHz).

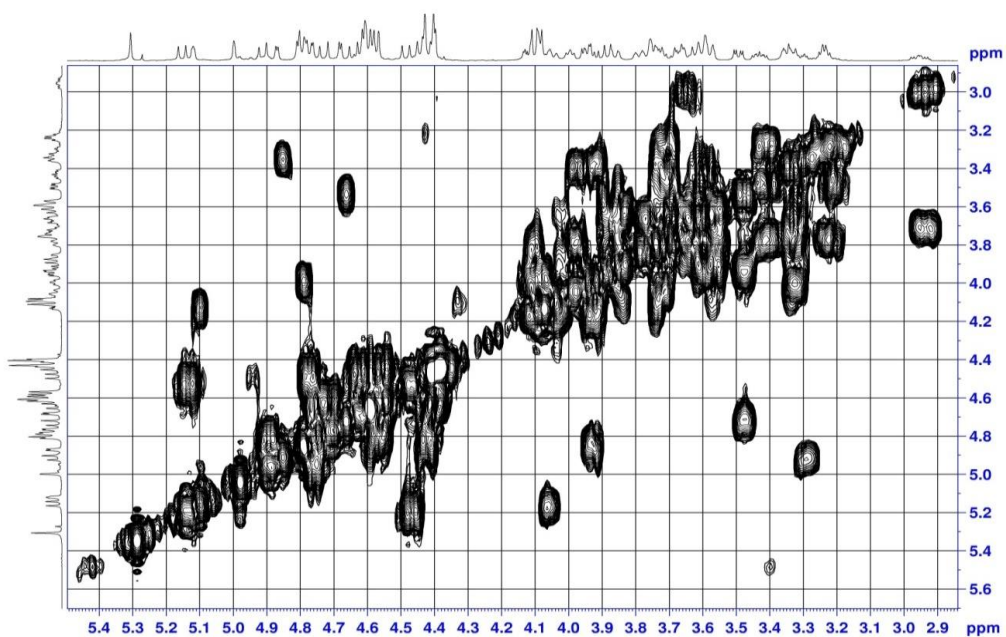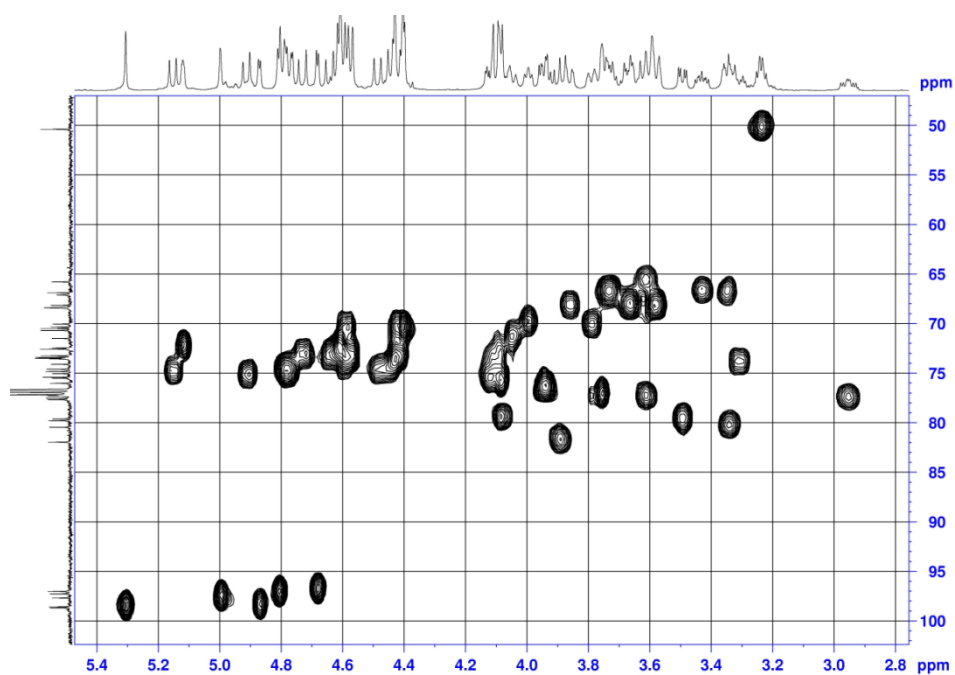

2D COSY and HSQC NMR spectra (selected regions) of 2-azidoethyl (2,4-di-*O*-benzyl-3,6-dideoxy- $\alpha$ -D-ribo-hexopyranosyl)-(1 $\rightarrow$ 3)-(2-*O*-acetyl-4,6-di-*O*-benzyl- $\alpha$ -D-mannopyranosyl)-(1 $\rightarrow$ 4)-(2,3-*O*-isopropylidene- $\alpha$ -L-rhamnopyranosyl)-(1 $\rightarrow$ 3)-[(2,3,4,6-tetra-*O*-benzyl- $\alpha$ -D-glucopyranosyl)-(1 $\rightarrow$ 6)]-2,4-di-*O*-benzyl- $\alpha$ -D-galactopyranoside (31) (CDCl<sub>3</sub>, 500 MHz).

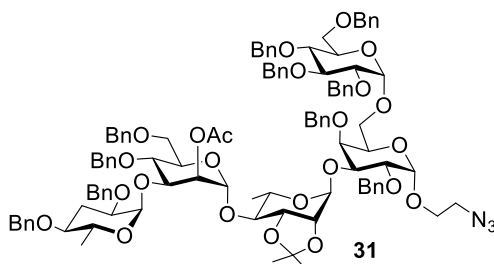

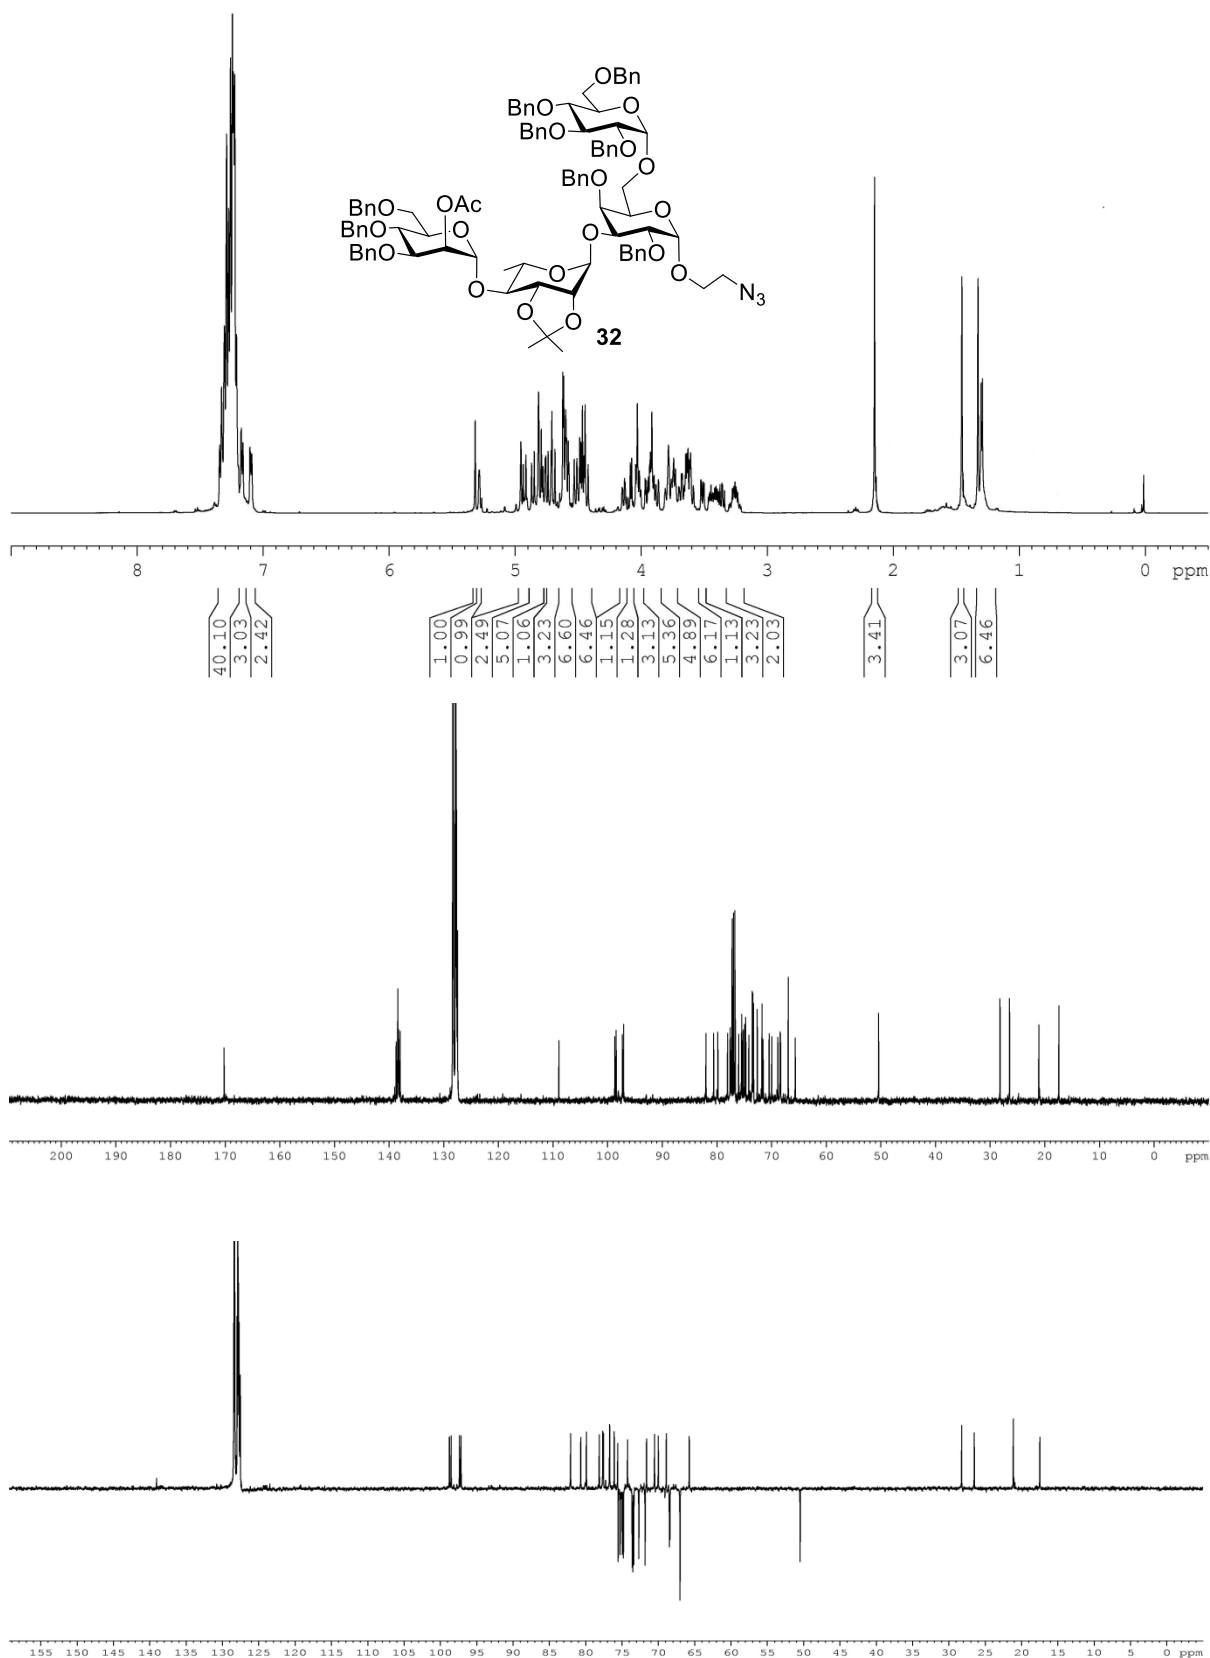

$^1\text{H}$ ,  $^{13}\text{C}$  and DEPT-135 NMR spectra of 2-azidoethyl (2-*O*-acetyl-3,4,6-tri-*O*-benzyl- $\alpha$ -D-mannopyranosyl)-(1 $\rightarrow$ 4)-(2,3-*O*-isopropylidene- $\alpha$ -L-rhamnopyranosyl)-(1 $\rightarrow$ 3)-[(2,3,4,6-tetra-*O*-benzyl- $\alpha$ -D-glucopyranosyl)-(1 $\rightarrow$ 6)]-2,4-di-*O*-benzyl- $\alpha$ -D-galactopyranoside (**32**) ( $\text{CDCl}_3$ , 500 MHz).



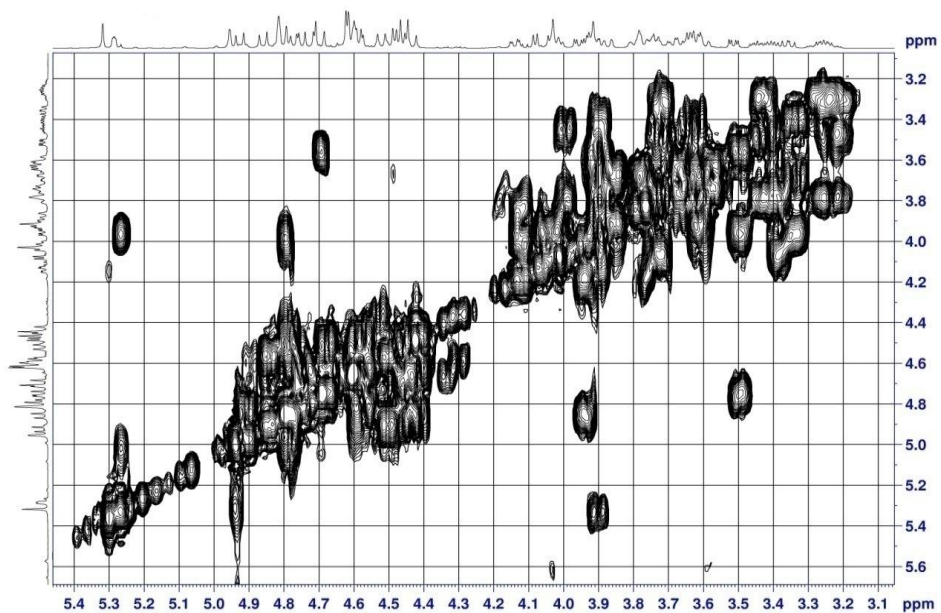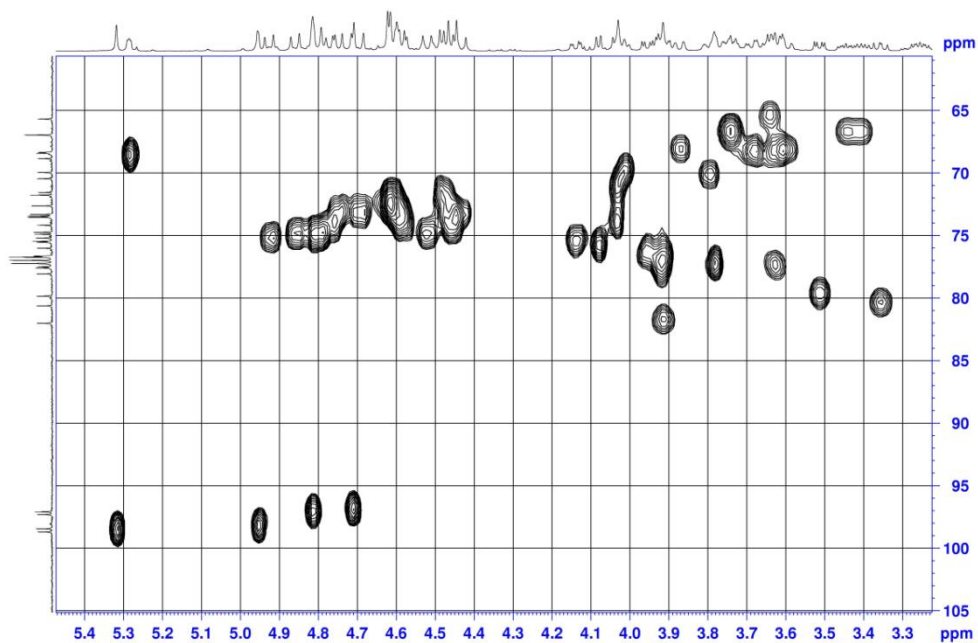

2D COSY and HSQC NMR spectra (selected regions) of 2-azidoethyl (2-*O*-acetyl-3,4,6-tri-*O*-benzyl- $\alpha$ -D-mannopyranosyl)-(1 $\rightarrow$ 4)-(2,3-*O*-isopropylidene- $\alpha$ -L-rhamnopyranosyl)-(1 $\rightarrow$ 3)-[(2,3,4,6-tetra-*O*-benzyl- $\alpha$ -D-glucopyranosyl)-(1 $\rightarrow$ 6)]-2,4-di-*O*-benzyl- $\alpha$ -D-galactopyranoside (**32**) (CDCl<sub>3</sub>, 500 MHz).

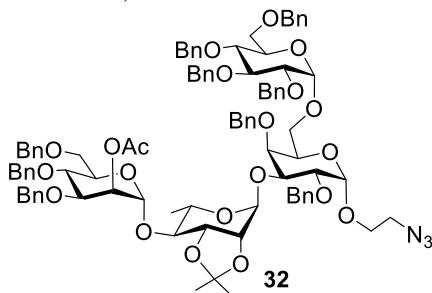

Supplement: NIHMS1631182-supplement-Supporting_info.pdf [file NIHMS1631182-supplement-Supporting_info.pdf]
